# Supplementary material
Source: Research Square preprint supplement (doi:10.21203/rs.3.rs-9391948/v1)
Supplement: Supplementary file 1 [file a9f0626cf8307709e44feb39.xlsx]

## Sheet: Sheet1
year	id	Do you use mobile data?	Do you access the internet using a computer?	Do you play online games?	Do you watch short videos?	Do you shop online?	Do you engage in online learning?	Do you use WeChat?	Frequency of posts on Moments	The Importance of the Internet for Work	The Importance of the Internet for Leisure and Entertainment	The Importance of the Internet for Staying in Touch with Family and Friends	The Importance of the Internet for Learning	The Importance of the Internet in Daily Life	sz	insurance	age	marry	edu	economic	family	zc	sr	agriture	jr	tpp
2020	1	1	0	0	1	1	0	1	5	3	3	4	4	4	0.0900168	0	30	1	9	3	6	64500	82900	0	0	1
2022	1	1	0	0	1	0	0	1	2	2	4	4	2	3	0.0311119	0	32	1	9	2	5	77260	80500	0	0	0
2020	2	1	0	0	1	1	0	1	7	5	5	5	5	4	0.113821	1	44	1	16	3	4	118480	156000	0	0	1
2022	2	1	0	0	1	1	0	1	1	3	4	4	3	4	0.0682794	1	46	1	16	3	4	42000	100000	0	1	0
2020	3	1	0	0	0	0	0	1	4	3	4	5	5	4	0.0453565	0	42	1	9	1	5	93680	70000	1	0	0
2022	3	1	0	0	1	1	0	1	2	3	4	5	5	3	0.0761095	0	44	1	9	2	5	42956	104160	1	0	0
2020	4	1	0	0	1	1	0	1	1	3	3	4	3	4	0.0660637	0	29	1	12	3	6	54940	90000	0	0	0
2022	4	1	0	1	1	0	0	1	2	5	3	4	4	4	0.147479	0	31	1	12	3	7	36500	151600	1	1	1
2020	5	1	0	0	1	1	0	1	2	2	5	5	4	5	0.0776719	1	38	1	9	3	6	157500	90400	0	0	1
2022	5	1	0	0	1	1	0	1	3	5	3	5	5	5	0.0893736	0	40	1	9	3	6	408760	200000	0	0	0
2020	6	1	0	0	1	0	0	1	2	5	4	5	4	5	0.0483606	1	39	1	10	4	6	157500	90400	0	0	1
2022	6	1	0	0	1	0	1	1	1	1	1	2	1	1	0.114162	1	41	1	9	4	6	408760	200000	0	0	0
2020	7	1	0	0	1	0	0	1	2	2	3	4	2	3	0.0288962	0	42	0	12	3	2	63770	50000	0	0	1
2022	7	1	0	0	1	1	0	1	3	1	2	1	1	2	0.0592883	0	44	0	12	1	4	25980	57000	0	0	1
2020	8	1	0	0	1	0	0	1	2	2	5	5	5	5	0.0437064	0	40	1	12	3	4	81960	82000	0	0	1
2022	8	1	0	1	1	0	0	1	2	2	5	5	4	5	0.145868	0	42	1	12	4	4	53440	97000	0	0	0
2020	9	1	0	1	1	1	1	1	6	3	2	4	4	4	0.302755	0	23	0	15	3	7	185840	267900	1	0	1
2022	9	1	0	1	1	0	0	1	7	5	5	3	3	5	0.179074	0	25	1	15	3	8	714200	240000	1	1	0
2020	10	1	0	0	1	0	0	1	1	5	5	5	4	5	0.0450559	0	44	0	9	2	3	52340	53400	0	0	1
2022	10	1	0	0	1	1	0	1	1	4	2	5	4	3	0.0672001	0	46	0	9	3	2	45236	24654	0	0	1
2020	11	1	0	0	1	1	0	1	6	3	4	4	4	4	0.097753	0	23	0	15	3	3	52340	53400	0	0	0
2022	11	1	0	0	1	1	0	1	5	2	5	5	5	5	0.0961046	1	25	0	15	3	1	143000	70000	0	1	1
2020	12	1	0	1	1	0	0	1	2	5	5	5	5	5	0.15648	0	42	1	15	3	6	47100	80000	0	0	1
2022	12	1	0	0	1	1	0	1	1	3	3	5	5	5	0.0725052	0	44	1	12	3	6	71210	91000	0	0	1
2020	13	1	0	0	1	1	0	1	3	5	3	3	5	5	0.088108	0	40	0	9	3	3	54360	53600	0	0	1
2022	13	1	0	0	1	1	0	1	2	4	5	5	5	4	0.0833049	0	42	0	9	3	3	54342	43680	0	0	1
2020	14	1	1	0	0	1	0	1	2	4	4	3	5	5	0.184876	1	27	0	16	3	1	192000	123000	0	1	0
2022	14	1	1	0	0	0	0	1	2	3	3	3	4	3	0.137907	1	29	0	16	2	1	69160	101000	0	0	0
2020	15	1	0	1	0	1	1	1	5	4	5	5	5	5	0.303342	0	35	1	9	3	4	59400	50000	1	0	1
2022	15	1	1	1	0	1	1	1	3	5	3	5	5	5	0.401794	1	37	1	9	3	4	104460	102600	1	0	1
2020	16	1	0	1	1	1	1	1	2	5	5	5	5	5	0.297718	0	32	1	9	3	4	134680	141000	1	0	1
2022	16	1	0	1	0	1	0	1	2	1	2	5	5	1	0.157729	0	34	1	9	4	7	100000	170000	1	0	0
2020	17	1	0	0	0	0	0	1	3	3	3	3	2	2	0.0266087	0	46	1	9	3	3	39060	50000	1	0	0
2022	17	1	0	0	0	0	0	1	3	1	3	3	1	3	0.0209757	0	48	1	9	3	3	51480	114900	1	0	1
2020	18	1	0	0	0	0	0	1	1	3	3	2	3	1	0.0147405	0	21	0	15	3	3	39060	50000	1	0	0
2022	18	1	1	0	1	1	0	1	2	4	3	3	3	4	0.184875	1	23	0	16	4	3	51480	114900	1	0	0
2020	19	1	0	0	1	1	1	1	2	5	5	5	5	5	0.193685	0	36	1	12	3	5	62300	118400	1	0	1
2022	19	1	0	0	1	1	0	1	2	3	4	4	4	4	0.0756712	0	38	1	9	1	5	57880	100000	1	0	1
2020	20	1	0	0	0	1	0	1	1	3	3	3	3	2	0.0532762	0	34	0	9	2	5	62300	118400	1	0	0
2022	20	1	0	0	1	0	0	1	1	1	3	2	2	1	0.0150645	0	36	0	9	1	3	61696	43550	1	0	0
2020	21	1	0	0	1	0	0	1	1	3	3	5	3	1	0.0246619	0	35	0	9	3	4	29696	24100	1	0	1
2022	21	1	1	0	1	1	0	1	3	5	4	5	4	3	0.196596	1	37	0	9	3	4	71720	60000	1	0	1
2020	22	1	0	1	1	1	0	1	5	5	5	5	5	5	0.208879	0	50	1	9	1	5	19500	20000	1	0	1
2022	22	1	0	0	1	0	0	1	4	5	3	4	3	2	0.0484839	0	52	1	9	1	5	14496	23500	1	0	0
2020	23	1	0	1	1	0	0	1	1	5	2	3	2	4	0.135367	0	48	1	6	2	4	33520	10000	0	0	1
2022	23	1	0	0	1	0	0	1	5	5	5	5	5	1	0.0607454	0	50	1	6	1	4	59600	13000	1	0	1
2020	24	1	0	0	1	0	0	1	1	3	3	5	3	3	0.0287937	0	46	1	0	1	4	33520	10000	0	0	0
2022	24	1	0	0	1	1	0	1	1	3	3	5	2	1	0.0586274	0	48	1	0	2	4	59600	13000	1	0	1
2020	25	1	0	0	0	0	0	1	1	1	1	5	1	1	0.0026372	0	41	1	9	4	6	37900	20000	1	0	1
2022	25	1	0	0	1	1	0	1	2	3	2	5	3	4	0.0700012	0	43	1	9	3	6	79500	33000	1	0	1
2020	26	1	1	1	1	1	1	1	5	5	5	5	5	5	0.425289	0	19	0	13	3	6	37900	20000	1	0	0
2022	26	1	1	1	1	1	1	1	3	5	5	5	5	5	0.414248	0	21	0	15	3	6	79500	33000	1	0	1
2020	27	1	0	0	1	1	0	1	1	5	5	5	5	5	0.0827642	0	45	1	9	5	5	38000	25300	0	0	1
2022	27	1	0	0	1	0	1	1	1	5	5	5	5	5	0.152328	0	47	1	9	3	5	59340	72100	1	0	1
2020	28	1	1	1	1	1	0	1	4	4	4	5	5	4	0.307173	0	22	0	15	4	5	38000	25300	0	0	1
2022	28	1	0	1	1	1	0	1	2	3	4	4	3	3	0.175767	0	24	0	15	3	5	59340	72100	1	0	1
2020	29	1	0	0	1	1	0	1	4	1	2	5	5	1	0.0727596	0	47	1	12	2	3	43400	63000	1	0	0
2022	29	1	0	0	1	1	0	1	1	1	1	4	1	1	0.0458642	0	49	1	12	2	3	52500	64500	1	0	1
2020	30	1	0	0	1	0	0	1	1	3	3	5	2	5	0.0310541	0	47	1	6	1	6	79568	81200	1	0	1
2022	30	1	0	0	1	0	0	1	1	1	5	5	3	5	0.0315294	0	49	1	6	3	4	75000	70000	1	0	1
2020	31	1	0	0	1	1	1	1	1	5	5	5	5	5	0.188165	0	44	1	9	2	6	182300	45340	1	0	1
2022	31	1	0	0	1	1	0	1	1	5	5	5	5	5	0.0827642	0	46	0	9	2	6	97900	90000	1	0	1
2020	32	1	0	0	1	1	1	1	6	2	5	5	5	2	0.200828	0	37	1	9	3	6	67000	56800	1	0	1
2022	32	1	0	0	1	0	0	1	1	1	1	1	1	1	0.0081289	0	39	1	9	3	6	40600	20000	1	0	1
2020	33	1	0	0	1	1	0	1	1	3	3	3	3	3	0.063365	0	36	1	6	3	6	67000	56800	1	0	1
2022	33	1	0	0	0	0	0	1	1	1	1	3	1	1	0.0013716	0	38	1	6	3	6	40600	20000	1	0	0
2020	34	1	0	0	0	1	0	1	7	1	4	3	2	1	0.0788496	0	21	0	13	3	5	51700	38000	1	0	1
2022	34	1	0	0	1	1	0	1	4	2	5	3	2	2	0.0775066	0	23	0	14	1	3	35000	16000	1	0	1
2020	35	1	0	0	1	1	0	1	4	4	4	4	4	3	0.08756	0	39	0	9	3	3	20160	60800	1	0	1
2022	35	1	0	0	1	0	0	1	3	5	5	5	5	3	0.0538363	0	41	0	9	2	3	41700	40000	1	0	1
2020	36	1	0	0	1	1	0	1	1	1	3	3	3	1	0.0534056	0	30	1	9	3	5	141900	54300	1	0	1
2022	36	1	0	0	1	0	0	1	1	1	3	5	5	3	0.0267089	0	32	1	9	3	5	147100	140500	1	0	1
2020	37	1	0	0	1	1	0	1	1	5	3	5	5	5	0.0783327	0	37	1	6	3	2	21646	8850	1	0	0
2022	37	1	0	0	1	1	1	1	4	5	3	5	5	5	0.200294	0	39	1	0	3	2	27125	13160	1	0	0
2020	38	1	0	0	1	1	1	1	3	5	5	5	5	5	0.199205	0	38	0	9	3	3	66100	70000	1	0	1
2022	38	1	0	0	1	0	0	1	3	5	5	5	5	1	0.0497045	0	40	0	9	3	3	74150	142760	1	0	1
2020	39	1	0	0	1	1	1	1	3	4	4	5	4	3	0.188073	0	42	0	9	3	2	54800	22180	1	0	1
2022	39	1	0	0	1	0	1	1	1	5	5	5	5	5	0.152328	0	44	0	0	2	2	20230	24200	1	0	0
2020	40	1	0	1	1	0	1	1	4	4	3	5	5	5	0.265576	0	47	1	9	3	4	171940	90000	0	0	1
2022	40	1	0	1	1	1	0	1	4	3	3	3	3	3	0.183959	0	49	1	9	3	4	303840	199000	1	0	1
2020	41	1	0	0	1	1	1	1	2	4	3	5	4	3	0.180337	0	50	1	12	3	4	171940	90000	0	0	0
2022	41	1	0	0	1	1	0	1	2	3	2	3	3	3	0.0666697	0	52	1	12	2	4	303840	199000	1	0	0
2020	42	1	0	1	1	1	0	1	4	5	2	5	5	3	0.192579	1	30	1	12	2	5	61980	63200	1	0	1
2022	42	1	0	1	1	1	0	1	3	2	3	3	2	4	0.175719	0	32	1	12	3	5	55400	62160	1	0	1
2020	43	1	0	0	1	1	0	1	7	5	5	5	5	5	0.115887	0	27	1	9	3	5	61980	63200	1	0	1
2022	43	1	0	1	1	1	0	1	7	5	5	5	5	5	0.219919	0	29	1	9	3	5	55400	62160	1	0	1
2020	44	1	0	0	1	1	1	1	5	1	3	5	3	3	0.186285	0	31	1	9	3	4	54980	50000	0	0	1
2022	44	1	0	0	1	0	0	1	5	5	5	5	5	3	0.0648772	1	33	1	9	3	4	63640	70000	0	0	0
2020	45	1	0	1	1	1	0	1	2	5	3	5	5	5	0.187886	1	39	1	9	4	3	60920	30000	0	0	1
2022	45	1	0	0	1	1	0	1	2	5	3	5	5	5	0.0838532	1	41	1	9	3	3	108160	110000	0	1	1
2020	46	1	0	0	1	1	0	1	2	1	1	5	3	2	0.0578262	0	32	1	9	1	4	98520	70000	0	0	1
2022	46	1	0	0	1	1	0	1	2	3	5	5	5	5	0.082457	0	34	1	9	3	4	67200	70000	0	0	1
2020	47	1	0	0	1	0	0	1	4	2	4	5	3	3	0.0446569	0	16	0	9	4	6	61060	64500	1	0	1
2022	47	1	1	0	0	0	0	1	3	3	4	4	3	2	0.142338	0	18	0	11	3	6	64100	65000	1	0	0
2020	48	1	0	0	0	0	0	1	1	3	4	4	5	3	0.0260964	0	46	1	9	3	3	30000	40000	1	0	1
2022	48	1	0	0	1	1	0	1	1	4	4	5	4	4	0.0736974	0	48	1	9	3	3	38596	50000	0	0	1
2020	49	1	0	1	1	1	0	1	2	5	5	4	5	4	0.189619	0	33	1	15	4	5	20000	129000	1	0	1
2022	49	1	1	0	1	1	0	1	2	5	3	5	4	3	0.18886	0	35	1	15	3	5	101340	150000	1	1	1
2020	50	1	1	0	1	1	1	1	3	3	4	3	4	3	0.294903	0	34	1	15	3	5	20000	129000	1	0	0
2022	50	1	1	0	1	1	0	1	3	5	5	5	5	4	0.202749	0	36	1	16	3	5	101340	150000	1	1	1
2020	51	1	0	1	1	1	0	1	2	1	5	5	5	5	0.180662	0	44	1	9	5	5	77200	130000	0	0	1
2022	51	1	0	1	1	1	0	1	4	5	5	5	3	3	0.195484	0	46	1	6	3	5	96600	180000	0	1	1
2020	52	1	0	0	1	1	0	1	6	1	1	5	5	5	0.0898484	0	42	1	9	5	5	77200	130000	0	0	0
2022	52	1	1	0	1	1	0	1	1	4	3	5	4	3	0.180425	0	44	1	9	4	5	96600	180000	0	1	0
2020	53	1	0	1	1	1	0	1	7	5	3	3	4	5	0.212351	0	45	1	9	4	5	81700	92700	1	0	0
2022	53	1	0	0	1	1	0	1	4	5	3	5	3	3	0.0870195	0	47	1	9	3	5	83320	186920	0	0	1
2020	54	1	0	0	1	1	0	1	4	4	5	4	4	3	0.0897757	0	22	0	15	3	5	81700	92700	1	0	0
2022	54	1	0	0	1	1	0	1	6	5	5	3	4	5	0.107229	1	24	0	15	4	5	83320	186920	0	0	0
2020	55	1	0	0	0	0	0	1	4	5	4	5	4	3	0.0472468	0	33	1	9	2	4	72250	78500	0	1	0
2022	55	1	0	0	1	1	0	1	5	4	5	5	4	5	0.100061	0	35	1	9	2	4	209934	86200	0	1	0
2020	56	1	0	0	0	0	0	1	1	5	5	4	5	5	0.0382715	0	32	1	12	3	4	3000	120000	0	0	0
2022	56	1	0	0	0	0	0	1	5	5	5	5	5	5	0.0609861	0	34	1	12	1	4	41150	103820	1	0	0
2020	57	1	0	0	1	1	0	1	2	5	5	5	5	4	0.0862187	0	32	1	15	2	4	3000	120000	0	0	0
2022	57	1	0	0	1	1	0	1	2	5	5	5	5	5	0.0882846	1	34	1	15	2	4	41150	103820	1	0	0
2020	58	1	0	0	0	1	0	1	1	2	1	2	1	1	0.0394895	0	31	1	9	1	7	17500	2000	1	0	0
2022	58	1	0	1	1	0	1	1	2	5	5	5	5	3	0.257749	0	33	1	6	1	7	111736	17800	1	0	1
2020	59	1	1	0	1	1	0	1	2	4	3	5	5	3	0.187817	1	34	1	15	3	3	60600	60000	0	0	0
2022	59	1	1	0	1	1	0	1	3	3	4	4	5	3	0.192007	0	36	1	15	3	3	59800	100000	0	0	0
2020	60	1	0	0	1	1	0	1	4	2	4	4	4	4	0.0837983	0	32	1	15	2	5	20000	70900	1	0	0
2022	60	1	0	0	1	1	0	1	5	5	3	3	3	4	0.0933402	0	34	1	15	2	6	72552	140000	1	1	0
2020	61	1	0	0	1	1	0	1	1	3	4	3	3	2	0.0635148	0	41	1	12	2	6	56520	34400	0	0	0
2022	61	1	1	0	1	0	0	1	1	2	3	4	4	3	0.138128	1	43	1	12	2	5	105810	90000	0	0	1
2020	62	1	0	0	1	0	1	1	6	5	5	5	5	5	0.17993	0	32	1	12	5	3	47300	70000	1	0	0
2022	62	1	0	0	0	0	1	1	5	5	5	5	5	5	0.166386	0	34	1	12	4	3	48100	52000	1	0	1
2020	63	1	0	0	0	0	0	1	1	3	1	5	2	4	0.0165339	0	51	1	9	3	4	34708	42200	1	0	0
2022	63	1	0	0	1	0	0	1	1	4	3	5	4	5	0.0377107	0	53	1	9	2	4	26804	54150	1	0	1
2020	64	1	0	1	1	0	0	1	1	5	3	5	3	2	0.136588	0	52	1	9	1	4	34708	42200	1	0	0
2022	64	1	0	1	1	0	0	1	1	4	4	2	2	3	0.134186	0	54	1	9	3	4	26804	54150	1	0	1
2020	65	1	1	0	0	1	1	1	2	5	3	5	5	4	0.290174	1	23	0	16	3	4	34708	42200	1	0	0
2022	65	1	1	0	0	1	1	1	2	5	5	5	5	5	0.296672	1	25	0	16	4	4	26804	54150	1	0	0
2020	66	1	0	0	0	1	1	1	1	3	3	5	5	3	0.165751	0	51	1	9	2	8	42240	53920	1	0	0
2022	66	1	0	0	1	1	0	1	1	3	2	5	3	4	0.0644808	0	53	1	9	2	3	47480	44500	1	0	1
2020	67	1	0	0	1	1	1	1	5	4	3	5	5	4	0.200835	0	52	1	9	3	8	42240	53920	1	0	0
2022	67	1	0	0	1	1	0	1	3	5	5	5	5	5	0.093805	0	54	1	9	3	3	47480	44500	1	0	0
2020	68	1	0	1	1	1	0	1	4	5	4	5	5	5	0.201143	0	31	1	9	3	6	50380	74800	1	0	0
2022	68	1	0	1	1	1	1	1	5	5	5	5	5	5	0.314279	0	33	1	9	3	6	56200	150000	1	0	0
2020	69	1	0	0	1	1	1	1	7	5	1	5	5	5	0.212424	0	31	1	9	3	6	50380	74800	1	0	0
2022	69	1	0	0	1	1	1	1	7	5	4	5	4	5	0.2172	0	33	1	9	3	6	56200	150000	1	0	0
2020	70	1	0	0	1	0	0	1	2	1	3	5	3	1	0.0243548	0	43	1	9	3	5	65740	45000	0	0	0
2022	70	1	0	0	1	0	0	1	2	5	3	3	3	4	0.040942	0	45	1	9	2	5	38000	69100	0	0	0
2020	71	1	1	0	1	0	0	1	4	4	4	4	3	3	0.160861	0	46	1	9	4	4	69720	86160	0	0	1
2022	71	1	0	0	1	0	0	1	2	5	3	5	3	4	0.0422076	0	48	1	9	3	4	87792	98180	0	0	1
2020	72	1	0	0	1	0	0	1	2	1	3	4	3	3	0.0278538	0	45	1	6	3	4	69720	86160	0	0	1
2022	72	1	0	1	1	1	0	1	4	3	3	4	3	3	0.184592	0	47	1	9	3	4	87792	98180	0	0	1
2020	73	1	0	1	1	0	0	1	2	5	5	5	5	5	0.15648	1	31	1	6	2	8	150000	226000	0	0	1
2022	73	1	0	0	1	1	0	1	1	5	3	5	5	5	0.0783327	0	33	1	6	3	3	60252	31000	0	0	1
2020	74	1	0	1	1	1	0	1	5	2	3	4	3	2	0.185133	0	47	1	6	2	5	169640	99300	1	0	0
2022	74	1	0	0	1	1	0	1	5	3	4	5	1	3	0.0851853	0	49	1	6	3	5	129520	94400	1	0	1
2020	75	1	0	0	1	1	1	1	1	5	3	3	4	2	0.174398	0	44	1	10	4	4	30000	113800	0	0	1
2022	75	1	1	1	1	1	0	1	2	2	3	3	4	5	0.287017	0	46	1	12	3	4	49244	120490	1	0	1
2020	76	1	0	0	1	0	1	1	5	3	3	5	3	3	0.156276	0	49	1	9	4	3	38420	70000	1	0	0
2022	76	1	0	0	1	0	0	1	5	2	2	4	2	2	0.0411758	0	51	1	9	3	2	56436	83600	1	0	1
2020	77	1	0	0	1	0	0	1	2	3	3	5	4	4	0.0382514	0	41	1	15	2	5	252172	300000	1	0	1
2022	77	1	0	0	1	1	0	1	4	5	5	5	5	5	0.0993255	0	43	1	15	3	5	71002	121200	1	0	1
2020	78	1	0	0	1	1	0	1	4	2	2	4	3	3	0.0754296	0	37	1	9	3	5	252172	300000	1	0	0
2022	78	1	0	0	1	1	1	1	4	3	5	5	3	5	0.195156	0	39	1	9	3	5	71002	121200	1	0	0
2020	79	1	0	1	1	1	1	1	3	5	4	5	5	3	0.296891	0	30	1	9	2	4	50300	40000	0	0	0
2022	79	1	0	0	1	0	0	1	5	3	4	4	3	2	0.0503924	0	32	1	9	3	4	30110	45000	0	0	0
2020	80	1	0	0	1	0	0	1	1	3	4	5	5	5	0.038884	0	32	1	9	5	5	82140	100700	1	0	1
2022	80	1	0	0	1	0	0	1	1	5	5	5	5	5	0.0469273	0	34	1	6	3	5	226792	50000	1	0	1
2020	81	1	0	0	1	0	0	1	5	5	5	5	5	5	0.069009	0	50	1	9	4	3	54640	200000	1	0	1
2022	81	1	0	0	1	0	0	1	1	5	5	5	5	5	0.0469273	0	52	1	9	5	2	28040	131100	1	0	1
2020	82	1	0	0	1	1	0	1	1	5	3	5	5	5	0.0783327	0	47	1	7	3	3	54640	200000	1	0	0
2022	82	1	0	0	1	0	0	1	1	3	3	5	4	5	0.0347969	0	49	1	9	3	2	28040	131100	1	0	0
2020	83	1	0	0	1	1	0	1	1	1	3	3	2	2	0.0536001	0	38	1	9	3	6	19740	60000	1	0	0
2022	83	1	0	0	1	0	0	1	1	1	3	5	5	3	0.0267089	0	40	1	9	3	6	272320	80000	1	0	1
2020	84	1	1	0	1	1	1	1	5	4	4	4	4	4	0.311556	0	21	0	15	3	3	5395	10000	1	0	0
2022	84	1	0	0	1	0	1	1	4	4	4	5	5	4	0.161694	0	23	1	15	4	2	35000	60000	0	0	0
2020	85	1	0	0	1	1	0	1	5	5	5	5	5	4	0.10278	0	38	1	12	3	5	85040	100000	1	0	1
2022	85	1	0	0	1	1	0	1	5	5	5	5	5	3	0.100714	0	40	1	12	3	5	49866	158636	1	0	1
2020	86	1	1	0	1	1	1	1	1	5	3	5	5	5	0.294743	1	30	1	9	3	3	123640	83600	1	0	0
2022	86	1	1	0	1	0	0	1	1	5	2	5	5	5	0.15129	1	32	1	9	3	3	125800	141000	0	0	0
2020	87	1	0	0	1	1	0	1	1	5	5	5	5	5	0.0827642	0	36	1	6	5	4	14840	13000	1	0	1
2022	87	1	0	1	1	1	0	1	1	1	3	5	3	5	0.166968	0	38	1	6	4	4	26328	25620	1	0	1
2020	88	1	0	0	1	1	0	1	5	5	5	5	5	5	0.104846	0	34	1	6	3	4	14840	13000	1	0	0
2022	88	1	0	0	1	1	0	1	2	2	3	5	5	4	0.0730459	0	36	1	6	2	4	26328	25620	1	0	0
2020	89	1	0	0	1	0	0	1	2	2	2	4	4	3	0.0304232	0	47	1	6	3	4	39420	50000	1	0	0
2022	89	1	0	0	1	0	0	1	3	5	3	4	4	4	0.0489666	0	49	1	6	3	4	50280	155700	1	0	0
2020	90	1	1	0	1	1	1	1	1	4	4	5	5	5	0.294045	0	21	0	15	4	4	39420	50000	1	0	0
2022	90	1	1	0	1	1	1	1	3	4	4	4	4	4	0.300515	1	23	0	16	3	4	50280	155700	1	0	1
2020	91	1	0	0	1	0	0	1	2	5	5	5	5	5	0.0524477	0	46	1	9	2	4	31100	33300	1	0	0
2022	91	1	0	0	1	1	0	1	2	4	5	5	5	4	0.0833049	0	48	1	9	2	4	46420	42130	1	0	0
2020	92	1	0	0	1	1	0	1	1	5	5	5	5	5	0.0827642	0	43	1	9	3	4	31100	33300	1	0	0
2022	92	1	0	0	1	0	0	1	3	3	3	5	5	5	0.0477091	0	45	1	9	2	4	46420	42130	1	0	0
2020	93	1	0	0	0	0	0	1	1	4	3	5	4	2	0.02349	0	55	1	9	3	2	14090	15000	1	0	0
2022	93	1	0	0	1	1	0	1	1	2	2	4	2	3	0.0569969	0	57	1	9	3	2	11856	37660	1	0	0
2020	94	1	0	1	0	0	0	1	2	5	5	5	5	5	0.148457	0	29	0	12	3	6	31340	65000	1	0	0
2022	94	1	0	1	1	1	0	1	3	5	3	5	4	5	0.191535	0	31	0	9	3	6	25100	40000	1	0	0
2020	95	1	0	0	1	0	0	1	2	5	5	5	5	5	0.0524477	0	43	1	6	5	5	34700	30900	1	0	1
2022	95	1	0	0	1	0	0	1	1	2	2	3	3	1	0.0182668	0	45	1	6	2	4	35180	30000	1	0	0
2020	96	1	0	0	1	1	0	1	4	4	4	5	4	4	0.0902587	0	42	1	6	4	5	34700	30900	1	0	0
2022	96	1	0	0	1	1	0	1	2	5	4	5	5	5	0.0860689	0	44	1	6	4	4	35180	30000	1	0	0
2020	97	1	0	0	1	1	0	1	4	3	4	5	4	4	0.0873449	0	29	1	12	2	3	233890	110000	1	0	0
2022	97	1	0	0	1	1	1	1	3	2	4	5	5	5	0.188248	1	31	1	12	3	3	124800	144000	0	0	0
2020	98	1	0	0	1	1	0	1	1	5	4	4	5	3	0.0757838	0	32	1	12	3	3	167624	122160	0	0	0
2022	98	1	0	0	1	1	0	1	2	4	4	5	4	5	0.0812837	0	34	1	12	3	4	146294	135000	0	0	0
2020	99	1	1	0	1	1	0	1	1	1	2	3	1	3	0.162589	0	32	1	12	2	4	31100	100500	0	0	0
2022	99	1	1	0	1	0	1	1	1	3	3	3	3	3	0.243938	0	34	1	13	2	4	74270	85000	0	0	0
2020	100	1	0	1	0	0	0	1	1	2	4	4	3	3	0.123473	0	33	1	12	2	6	13800	20300	1	0	1
2022	100	1	0	1	1	1	0	1	2	3	4	5	4	4	0.180337	0	35	1	12	2	6	59160	62090	1	0	1
2020	101	1	1	0	1	1	1	1	3	5	5	5	5	5	0.310215	0	34	1	9	3	2	64272	120000	0	0	1
2022	101	1	0	0	1	1	1	1	6	5	5	5	5	5	0.215767	1	36	1	9	3	2	57200	150000	0	0	1
2020	102	1	0	0	1	1	0	1	5	3	3	4	5	5	0.0939541	0	29	1	12	3	2	25440	80000	0	0	1
2022	102	1	0	1	1	0	0	1	3	3	3	5	4	5	0.14987	1	31	1	12	3	1	17720	60000	0	0	1
2020	103	1	0	1	1	1	0	1	1	3	3	4	4	4	0.171968	1	34	1	9	3	2	64272	120000	0	0	1
2022	103	1	0	0	1	1	1	1	4	4	4	5	4	4	0.195659	1	36	1	9	3	2	57200	150000	0	0	1
2020	104	1	0	0	1	1	1	1	5	4	4	4	5	5	0.204484	1	28	0	16	3	6	75000	231740	1	0	0
2022	104	1	1	0	1	1	0	1	5	5	5	5	5	5	0.215856	0	30	1	16	3	2	74200	100000	0	0	0
2020	105	1	1	0	1	1	0	1	2	5	5	5	5	5	0.199294	1	34	1	15	3	6	75000	231740	1	0	1
2022	105	1	1	0	1	1	1	1	2	5	4	5	5	5	0.302479	1	36	1	15	2	5	70000	120000	1	1	1
2020	106	1	0	0	0	0	1	1	6	1	1	3	4	3	0.14412	0	38	1	12	3	6	33268	63990	1	0	1
2022	106	1	0	0	1	1	1	1	7	5	5	5	5	5	0.221287	0	40	1	12	1	6	35410	75350	1	0	1
2020	107	1	0	0	0	1	1	1	1	4	5	4	5	5	0.176595	0	38	1	12	3	6	33268	63990	1	0	0
2022	107	1	1	1	1	1	1	1	3	3	4	4	4	5	0.4037	0	40	1	12	3	6	35410	75350	1	0	1
2020	108	1	0	0	1	0	0	1	2	4	4	5	3	4	0.0415095	0	56	1	9	3	3	35000	40180	1	0	1
2022	108	1	0	0	1	1	0	1	1	3	1	2	3	2	0.0562348	0	58	1	9	3	3	38820	41420	1	0	1
2020	109	1	0	1	1	1	0	1	1	5	5	1	5	5	0.184266	0	33	0	12	3	3	43455	30795	1	1	1
2022	109	1	0	1	1	1	0	1	2	5	5	5	5	5	0.192317	0	35	0	9	2	3	15961	65000	1	1	1
2020	110	1	0	0	1	1	0	1	1	3	4	5	4	5	0.0728495	0	37	1	9	3	4	51860	68230	1	0	1
2022	110	1	0	0	1	0	0	1	1	1	2	5	4	5	0.0267536	0	39	1	9	1	4	25920	70000	1	0	1
2020	111	1	1	1	1	1	1	1	2	4	3	5	4	3	0.395379	0	33	1	9	3	4	7600	30100	1	0	1
2022	111	1	1	1	1	1	0	1	2	4	4	5	5	4	0.296132	0	35	1	9	3	5	61550	73980	1	0	0
2020	112	1	0	0	1	0	0	1	1	4	5	5	5	5	0.0440135	0	53	1	9	1	4	7600	30100	1	0	1
2022	112	1	0	0	1	1	0	1	1	5	5	5	5	5	0.0827642	0	55	1	9	1	5	61550	73980	1	0	1
2020	113	1	0	1	1	1	0	1	5	3	5	5	5	5	0.203051	0	28	0	12	3	4	7600	30100	1	0	1
2022	113	1	0	1	1	1	0	1	5	5	5	5	5	5	0.208879	0	30	0	12	3	5	61550	73980	1	0	1
2020	114	1	0	0	1	0	0	1	1	5	5	5	5	5	0.0469273	0	53	1	9	3	2	27590	34680	1	0	0
2022	114	1	0	0	1	0	0	1	1	5	5	5	5	1	0.0386637	0	55	1	9	1	2	23280	37370	1	0	1
2020	115	1	0	0	1	0	0	1	2	3	5	5	2	1	0.0327424	0	50	1	9	3	3	50660	50000	0	0	1
2022	115	1	0	0	0	1	0	1	1	1	1	4	1	1	0.0378413	0	52	1	9	3	3	19490	98000	0	0	0
2020	116	1	0	0	1	0	0	1	5	5	5	5	5	5	0.069009	0	22	0	15	3	1	90400	60000	0	0	0
2022	116	1	1	0	1	0	1	1	1	5	5	5	5	5	0.263337	1	24	0	15	3	1	214600	200000	0	0	1
2020	117	1	0	0	1	0	1	1	2	4	2	5	5	1	0.140024	0	31	1	9	3	4	97340	80000	0	0	0
2022	117	1	0	0	1	1	0	1	2	5	4	5	5	5	0.0860689	0	33	1	6	3	4	131220	100000	0	0	0
2020	118	1	0	0	1	1	0	1	5	3	3	5	3	3	0.0867123	0	30	1	9	3	4	97340	80000	0	0	0
2022	118	1	0	0	1	1	0	1	5	1	5	5	5	5	0.0931908	0	32	1	9	1	4	131220	100000	0	0	0
2020	119	1	0	0	1	1	0	1	4	3	4	5	4	3	0.085279	0	35	1	6	3	7	35038	108060	1	0	1
2022	119	1	0	1	1	1	1	1	4	3	5	5	3	5	0.299188	0	37	1	9	3	7	54900	140000	1	0	1
2020	120	1	0	0	1	1	0	1	1	5	5	5	5	5	0.0827642	0	32	0	9	3	7	35038	108060	1	0	0
2022	120	1	0	1	1	1	0	1	1	5	5	5	5	5	0.186797	0	34	0	9	5	7	54900	140000	1	0	0
2020	121	1	0	0	1	0	0	1	1	5	5	5	4	4	0.04299	0	33	1	6	2	7	35038	108060	1	0	0
2022	121	1	0	0	1	1	0	1	4	5	5	5	5	5	0.0993255	0	35	1	6	4	7	54900	140000	1	0	1
2020	122	1	0	0	1	1	1	1	3	4	3	3	4	2	0.182526	0	20	0	12	2	3	38328	32300	0	0	0
2022	122	1	0	0	1	1	0	1	2	5	5	5	5	5	0.0882846	0	22	1	12	2	2	12000	30000	0	0	0
2020	123	1	0	0	1	0	1	1	5	5	5	5	4	5	0.172538	0	47	1	9	3	6	37980	83664	1	0	1
2022	123	1	0	0	1	0	0	1	4	4	4	5	4	3	0.0523559	0	49	1	9	3	7	41078	62600	1	0	1
2020	124	1	0	1	1	0	0	1	2	2	2	2	2	1	0.125316	0	16	0	9	3	6	37980	83664	1	0	0
2022	124	1	0	1	1	0	0	1	3	5	5	5	1	4	0.152449	0	18	0	9	3	7	41078	62600	1	0	0
2020	125	1	0	1	1	0	0	1	4	4	5	5	5	5	0.164607	0	33	1	12	3	4	32140	101710	1	0	0
2022	125	1	0	0	1	1	0	1	2	3	3	4	5	5	0.0773928	0	35	1	12	3	4	70476	150000	0	0	1
2020	126	1	1	0	1	0	0	1	6	1	2	5	3	1	0.15523	0	36	1	9	2	4	24700	30000	1	0	0
2022	126	1	0	0	1	0	0	1	4	3	3	5	3	4	0.0474209	0	38	1	9	2	4	29380	62630	1	0	0
2020	127	1	0	0	1	1	0	1	1	5	3	5	5	3	0.0742009	0	38	1	9	2	4	24700	30000	1	0	0
2022	127	1	0	0	1	1	0	1	2	3	2	4	5	3	0.0710453	0	40	1	9	2	4	29380	62630	1	0	0
2020	128	1	0	0	1	0	0	1	3	1	2	5	5	2	0.0334682	0	50	1	9	1	3	14378	82500	1	0	1
2022	128	1	0	0	1	0	0	1	1	3	3	5	3	4	0.0308596	0	52	1	9	1	3	16960	90740	1	0	0
2020	129	1	0	1	1	0	0	1	1	1	5	5	5	1	0.131041	0	29	0	12	3	3	14378	82500	1	0	0
2022	129	1	0	1	0	0	0	1	1	1	4	5	3	3	0.121192	0	31	0	12	3	3	16960	90740	1	0	0
2020	130	1	0	0	1	0	0	1	1	1	4	5	4	2	0.0249873	0	27	1	6	3	4	38960	42000	0	0	0
2022	130	1	0	0	1	1	1	1	2	4	4	5	5	5	0.188555	0	29	1	6	3	4	72000	50000	0	0	0
2020	131	1	0	0	1	0	0	1	3	5	2	3	3	2	0.0401149	0	28	1	9	4	4	38960	42000	0	0	0
2022	131	1	0	0	1	1	0	1	4	5	3	4	1	1	0.0785121	0	30	1	6	3	4	72000	50000	0	0	0
2020	132	1	0	1	1	1	0	1	1	1	4	3	3	5	0.167918	0	32	1	9	1	7	45112	60000	1	0	1
2022	132	1	0	1	1	1	0	1	1	4	5	4	3	4	0.177442	0	34	1	9	2	8	45650	167505	1	0	1
2020	133	1	0	0	0	0	0	1	1	1	3	3	3	2	0.0116117	0	53	1	2	4	2	14056	20000	1	0	0
2022	133	1	0	0	1	0	0	1	1	3	3	4	3	3	0.0281609	0	55	1	0	3	2	35970	35000	1	0	1
2020	134	1	0	0	1	0	0	1	2	2	1	3	1	1	0.0178287	0	30	1	9	3	4	40000	70000	0	0	0
2022	134	1	0	1	1	1	0	1	1	3	2	3	2	2	0.161245	0	32	1	6	3	4	131560	60000	0	0	1
2020	135	1	0	0	1	1	0	1	3	5	3	5	5	5	0.0893736	0	33	1	7	2	4	52696	30500	0	0	1
2022	135	1	0	0	1	1	0	1	3	4	5	5	5	5	0.0908913	0	35	1	7	2	4	176199	60000	0	0	1
2020	136	1	0	0	1	1	0	1	3	4	3	4	4	3	0.0798238	0	32	1	9	2	4	40000	70000	0	0	0
2022	136	1	0	0	1	1	1	1	1	3	3	3	2	2	0.164828	0	34	1	9	2	4	131560	60000	0	0	0
2020	137	1	0	0	1	0	0	1	1	5	5	5	5	5	0.0469273	0	50	1	8	3	3	28016	154700	1	0	0
2022	137	1	0	0	1	0	0	1	1	5	5	5	5	5	0.0469273	0	52	1	8	3	3	29500	163400	1	0	0
2020	138	1	0	0	1	1	0	1	2	5	5	5	3	3	0.08041	0	30	1	16	3	2	82180	120000	0	0	0
2022	138	1	0	0	1	1	0	1	3	5	5	5	5	1	0.0855414	0	32	1	16	3	3	244800	150000	0	1	0
2020	139	1	1	0	1	1	0	1	4	5	5	4	4	5	0.207831	0	46	1	9	4	5	91360	52800	1	0	0
2022	139	1	0	0	1	1	1	1	1	4	5	5	4	5	0.183379	0	48	1	9	3	5	78976	85000	0	0	0
2020	140	1	0	0	1	1	0	1	4	4	3	4	4	4	0.0874102	0	45	1	9	3	5	91360	52800	1	0	0
2022	140	1	0	0	1	1	0	1	4	3	3	5	3	5	0.0853237	0	47	1	9	3	5	78976	85000	0	0	0
2020	141	1	1	1	1	1	0	1	3	3	4	4	3	3	0.292297	0	21	0	12	3	1	34520	60000	0	0	0
2022	141	1	1	1	1	1	0	1	1	3	3	3	3	3	0.278407	0	23	0	12	3	1	41860	70000	0	0	0
2020	142	1	0	0	1	1	0	1	2	3	3	4	1	3	0.0657755	0	51	1	10	3	3	37500	68390	1	0	0
2022	142	1	0	0	1	1	0	1	1	1	3	3	3	3	0.0575374	0	53	1	10	2	3	31600	40000	1	0	0
2020	143	1	0	0	0	1	1	1	1	5	1	3	5	2	0.163816	0	37	1	12	4	5	83370	150000	1	0	0
2022	143	1	1	0	1	1	0	1	1	5	1	5	5	2	0.178713	0	39	1	15	4	6	123920	197000	0	0	0
2020	144	1	0	0	1	0	0	1	5	1	3	5	3	5	0.0491797	0	54	1	12	3	2	10606	19000	0	0	0
2022	144	1	0	0	1	0	0	1	2	5	5	5	5	5	0.0524477	0	56	1	12	2	2	14808	20000	0	0	0
2020	145	1	0	0	1	1	0	1	2	3	3	5	4	3	0.0720224	0	58	1	11	3	4	58900	86440	1	0	1
2022	145	1	0	0	1	0	0	1	1	3	4	5	5	5	0.038884	0	60	1	11	3	4	57000	114740	0	0	1
2020	146	1	1	0	1	1	1	1	7	5	3	5	5	5	0.327865	0	30	1	15	2	2	43010	480000	0	0	0
2022	146	1	1	0	1	1	1	1	7	5	2	5	3	5	0.321907	0	32	0	15	2	2	51720	80000	0	1	0
2020	147	1	0	0	1	0	1	1	2	3	3	5	5	5	0.147589	1	26	0	16	2	4	58900	86440	1	0	0
2022	147	1	1	0	1	1	1	1	3	4	4	5	5	5	0.305086	0	28	0	16	3	4	57000	114740	0	0	1
2020	148	1	0	0	1	1	1	1	6	4	3	3	4	4	0.203219	1	31	1	15	3	3	92300	80000	0	0	1
2022	148	1	1	1	0	1	1	1	5	5	4	5	5	3	0.410918	1	33	1	16	3	4	150000	200000	0	0	0
2020	149	1	0	0	1	0	0	1	2	3	4	4	3	4	0.0379629	0	33	1	9	2	2	266420	60000	0	0	0
2022	149	1	0	0	1	1	0	1	3	4	3	3	3	4	0.0793855	0	35	0	9	2	1	284020	50000	0	0	0
2020	150	1	0	0	1	0	0	1	1	5	3	5	5	5	0.0424958	0	68	1	0	3	2	34302	9500	0	0	1
2022	150	1	0	0	1	0	0	1	1	3	2	4	2	2	0.0220079	0	70	1	0	3	2	45108	14700	0	0	1
2020	151	1	0	0	1	1	0	1	2	4	3	5	3	5	0.0771966	0	29	1	9	3	3	75440	30000	0	0	0
2022	151	1	0	0	1	1	0	1	2	2	1	2	2	1	0.0549042	0	31	1	9	1	4	58520	40000	0	0	0
2020	152	1	1	0	1	0	0	1	2	4	4	5	5	4	0.156262	0	33	1	6	3	5	92060	80000	1	0	0
2022	152	1	0	0	1	0	0	1	1	2	2	5	3	2	0.0215983	0	35	1	6	2	5	103765	80000	1	0	0
2020	153	1	0	0	0	0	0	1	1	1	1	1	1	1	0.000106	0	38	1	9	2	4	42700	29700	1	0	0
2022	153	1	0	0	1	0	0	1	2	2	1	4	3	2	0.0242702	0	40	1	6	1	4	33040	39350	1	0	0
2020	154	1	0	1	1	0	0	1	2	3	3	3	3	3	0.137081	0	37	1	9	3	4	42700	29700	1	0	0
2022	154	1	0	1	1	0	0	1	2	3	4	4	3	3	0.13993	0	39	1	6	3	4	33040	39350	1	0	0
2020	155	1	0	1	1	1	0	1	3	4	5	5	5	3	0.190792	0	50	1	7	1	8	73000	80000	1	0	1
2022	155	1	0	0	1	0	0	1	2	2	3	5	5	5	0.0392749	0	52	1	7	2	8	102704	131140	1	0	0
2020	156	1	0	1	1	1	0	1	3	2	3	4	3	2	0.174092	0	30	1	15	3	8	73000	80000	1	0	0
2022	156	1	0	0	1	0	0	1	2	2	2	4	3	4	0.0306177	0	32	1	9	3	8	102704	131140	1	0	0
2020	157	1	1	0	1	0	0	1	1	2	2	4	3	1	0.129909	0	32	1	12	3	8	73000	80000	1	0	0
2022	157	1	0	0	1	0	1	1	1	2	2	3	3	3	0.127799	1	34	1	12	2	8	102704	131140	1	0	0
2020	158	1	1	0	1	1	1	1	5	5	5	5	5	5	0.321256	0	38	1	9	4	6	159960	145400	1	0	1
2022	158	1	0	0	1	0	1	1	4	5	5	5	5	5	0.168889	0	40	1	6	4	6	120540	189900	1	0	1
2020	159	1	0	0	1	1	0	1	4	3	4	4	4	4	0.0867121	0	38	1	12	4	6	159960	145400	1	0	1
2022	159	1	0	0	0	1	1	1	4	4	3	5	5	5	0.189358	0	40	1	12	3	6	120540	189900	1	0	1
2020	160	1	0	0	1	1	0	1	5	1	5	5	1	5	0.0857053	0	35	1	9	2	6	75000	45200	0	0	0
2022	160	1	0	0	1	1	0	1	3	1	4	5	3	4	0.0741255	0	37	1	9	1	5	63260	41240	0	0	0
2020	161	1	1	1	1	1	0	1	3	3	4	5	5	5	0.300804	0	37	1	9	3	6	30000	80000	1	0	1
2022	161	1	1	0	1	1	0	1	6	5	4	5	4	5	0.217289	0	39	1	9	3	6	39800	47050	0	0	0
2020	162	1	0	0	1	0	0	1	1	3	3	4	4	3	0.0300323	0	57	1	12	3	7	59920	120000	0	0	0
2022	162	1	0	0	1	1	0	1	1	5	5	5	5	5	0.0827642	0	59	1	12	3	7	63080	104970	1	0	0
2020	163	1	0	1	1	1	0	1	7	5	5	5	5	5	0.219919	0	23	0	12	5	6	150940	202001	0	0	0
2022	163	1	0	1	1	1	1	1	4	5	5	5	3	5	0.305016	0	25	0	12	5	6	128920	240000	1	0	0
2020	164	1	0	0	1	0	0	1	1	3	2	2	4	3	0.0265509	0	45	1	9	3	3	49200	100000	0	0	0
2022	164	1	0	0	1	0	0	1	1	1	2	4	2	2	0.0161803	0	47	1	9	2	3	102836	100000	0	0	0
2020	165	1	0	0	1	0	0	1	5	3	3	4	4	4	0.0541799	0	41	1	9	3	7	92260	80000	0	0	1
2022	165	1	0	0	1	0	1	1	6	4	3	4	3	4	0.166143	0	43	1	12	3	6	20000	70000	0	0	1
2020	166	1	0	0	1	0	0	1	3	2	2	4	2	2	0.030135	0	33	1	9	2	2	13408	10000	0	0	0
2022	166	1	0	0	0	0	0	1	3	2	2	3	1	3	0.0216738	0	35	1	9	1	2	18480	20000	0	0	0
2020	167	1	0	0	1	0	0	1	3	1	3	3	3	2	0.0306755	0	33	1	12	2	4	27480	150000	0	0	0
2022	167	1	0	0	1	1	0	1	2	3	3	5	2	3	0.0682797	0	35	1	9	2	4	43456	121200	0	0	0
2020	168	1	0	0	1	0	0	1	5	5	5	5	5	5	0.069009	0	31	1	9	2	4	91880	50000	0	0	0
2022	168	1	0	0	0	0	0	1	5	3	3	5	3	3	0.0428525	0	33	1	9	3	4	110996	150000	0	0	0
2020	169	1	0	0	1	1	0	1	5	5	4	5	5	4	0.100564	0	29	1	9	1	4	91880	50000	0	0	0
2022	169	1	0	0	1	1	1	1	5	3	3	4	4	3	0.193351	0	31	1	9	3	4	110996	150000	0	0	0
2020	170	1	0	0	0	0	0	1	1	3	4	5	5	4	0.0287952	0	30	1	12	3	4	54600	60400	1	0	0
2022	170	1	0	1	0	0	0	1	5	4	5	5	5	4	0.160039	1	32	1	12	3	4	110496	62000	0	0	0
2020	171	1	1	0	1	1	0	1	4	4	3	3	2	2	0.189912	0	38	1	9	2	6	163840	130000	0	0	0
2022	171	1	0	0	1	1	0	1	2	4	4	3	2	1	0.0680117	0	40	1	9	3	4	53080	100000	0	0	0
2020	172	1	0	0	1	0	0	1	5	3	2	3	3	2	0.0453282	0	45	1	9	3	4	212940	112180	1	0	1
2022	172	1	0	0	1	1	0	1	1	5	2	4	4	3	0.069481	0	47	1	9	4	4	58136	157420	1	0	1
2020	173	1	0	0	1	0	0	1	1	3	4	4	3	2	0.0283107	0	46	1	9	3	4	212940	112180	1	0	0
2022	173	1	0	0	1	0	0	1	1	3	4	5	3	3	0.0310094	0	48	1	9	3	4	58136	157420	1	0	1
2020	174	1	1	1	1	1	1	1	3	5	5	5	5	5	0.414248	0	19	0	9	3	4	212940	112180	1	0	0
2022	174	1	0	1	1	1	0	1	1	5	5	5	5	5	0.186797	0	21	0	9	2	4	58136	157420	1	0	0
2020	175	1	1	0	1	0	1	1	7	5	4	5	5	5	0.294244	0	28	1	12	3	3	98750	170000	0	0	0
2022	175	1	1	0	1	1	1	1	7	5	3	4	4	4	0.323295	1	30	1	12	3	3	194900	200000	0	0	0
2020	176	1	0	0	1	1	0	1	2	2	2	4	4	5	0.0703919	0	31	1	9	2	6	35650	16000	1	0	0
2022	176	1	0	0	0	1	0	1	3	5	5	5	5	5	0.0857821	0	33	1	9	3	6	68200	31000	0	0	0
2020	177	1	0	0	1	1	0	1	2	3	4	5	4	4	0.076304	0	36	1	9	2	4	50580	50000	0	0	0
2022	177	1	0	0	1	0	0	1	2	4	3	4	4	3	0.0384665	0	38	1	6	3	4	58596	55000	0	0	0
2020	178	1	0	0	1	0	0	1	1	4	4	5	4	2	0.0337287	0	50	1	12	2	4	27660	67600	1	0	0
2022	178	1	0	0	1	0	0	1	1	1	1	5	1	1	0.0106601	0	52	1	12	3	3	31720	59960	1	0	1
2020	179	1	0	0	1	0	0	1	1	4	4	4	4	4	0.0372277	0	51	1	9	4	3	45692	50000	1	0	1
2022	179	1	0	0	1	0	0	1	1	5	5	5	5	5	0.0469273	0	53	1	9	4	3	31010	45000	1	0	1
2020	180	1	0	0	1	0	1	1	1	5	5	5	5	5	0.152328	0	48	1	9	3	5	69490	50000	1	0	1
2022	180	1	0	0	1	0	0	1	1	5	5	5	5	3	0.0427955	0	50	1	9	3	5	40540	70000	1	0	1
2020	181	1	1	1	1	1	1	1	2	5	3	5	5	4	0.40223	0	19	0	12	3	3	51900	30000	1	0	0
2022	181	1	1	1	1	0	1	1	3	5	4	4	4	4	0.371625	1	21	0	15	3	3	8396	104296	1	0	0
2020	182	1	1	1	0	1	1	1	1	5	5	2	4	2	0.385217	1	22	0	16	2	7	53500	35000	1	0	0
2022	182	1	0	0	0	0	0	1	1	5	5	2	4	3	0.0310027	1	24	0	16	3	7	39220	89800	1	0	0
2020	183	1	0	0	1	0	0	1	1	5	5	5	5	5	0.0469273	0	52	1	9	2	3	15384	25550	0	0	1
2022	183	1	0	0	1	0	0	1	1	3	3	5	3	2	0.0267278	0	54	1	9	2	3	24900	50200	0	0	1
2020	184	1	0	1	1	0	0	1	3	3	4	5	4	4	0.15002	0	51	1	12	3	3	15384	25550	0	0	1
2022	184	1	0	1	1	1	0	1	2	2	4	5	4	5	0.179489	0	53	1	12	2	3	24900	50200	0	0	1
2020	185	1	0	0	1	0	0	1	3	1	1	5	5	1	0.0291865	0	50	1	12	2	5	49460	50660	1	0	1
2022	185	1	0	0	1	0	0	1	1	2	2	2	2	2	0.0178285	0	52	1	12	1	4	54720	10000	1	0	1
2020	186	1	0	0	1	0	0	1	1	2	2	5	4	2	0.0234697	0	50	1	6	3	5	49460	50660	1	0	0
2022	186	1	0	0	1	0	0	1	3	5	3	4	4	3	0.0469007	0	52	1	6	4	4	54720	10000	1	0	0
2020	187	1	0	1	1	1	0	1	4	4	5	5	5	4	0.198379	0	29	1	12	1	4	45000	35000	0	0	0
2022	187	1	0	0	1	1	0	1	6	5	2	5	3	4	0.0979105	0	31	1	9	2	4	125150	25000	0	0	0
2020	188	1	0	0	1	0	0	1	3	3	3	4	4	3	0.0410731	0	49	1	6	3	4	51600	53930	0	0	1
2022	188	1	0	0	1	1	0	1	3	5	3	4	3	3	0.0808662	0	51	1	6	3	4	90972	88000	0	0	1
2020	189	1	0	0	1	0	0	1	2	5	4	4	4	3	0.043596	0	41	1	9	3	4	51600	53930	0	0	0
2022	189	1	0	0	1	1	1	1	2	5	3	4	4	4	0.184684	0	43	1	9	4	4	90972	88000	0	0	0
2020	190	1	0	0	1	1	0	1	1	5	3	5	5	4	0.0762668	0	40	1	9	2	5	76100	75081	0	1	1
2022	190	1	0	0	1	1	0	1	1	4	4	5	4	5	0.0757633	0	42	1	9	3	5	101160	70000	1	1	1
2020	191	1	1	0	1	1	0	1	2	5	3	5	5	5	0.194863	0	42	1	9	4	5	76100	75081	0	1	1
2022	191	1	1	0	1	1	1	1	1	4	4	4	4	5	0.29154	0	44	1	9	3	5	101160	70000	1	1	1
2020	192	1	0	1	1	0	0	1	1	5	5	5	5	5	0.15096	0	56	1	9	3	2	20060	30000	1	0	1
2022	192	1	1	1	1	1	0	1	3	3	3	5	4	5	0.296717	0	58	0	9	3	1	11640	25000	1	0	1
2020	193	1	0	0	1	0	0	1	1	5	4	5	4	1	0.0345766	0	32	1	9	4	4	17906	53400	1	0	0
2022	193	1	0	0	0	0	0	1	1	4	4	5	5	4	0.0317089	0	34	1	9	3	5	7670	51000	0	0	0
2020	194	1	0	0	1	1	0	1	5	4	2	5	5	5	0.095285	0	42	1	9	2	5	23620	62830	0	1	1
2022	194	1	0	0	1	0	0	1	3	5	3	5	5	5	0.0535367	0	44	1	9	3	5	28964	230000	1	0	1
2020	195	1	1	1	1	1	1	1	3	3	3	4	3	3	0.395481	0	20	0	15	3	5	23620	62830	0	1	1
2022	195	1	1	1	1	1	0	1	2	5	5	5	5	5	0.303327	0	22	0	15	2	5	28964	230000	1	0	1
2020	196	1	1	1	1	1	1	1	3	4	3	5	4	4	0.402965	1	42	1	12	4	5	140000	143400	0	0	1
2022	196	1	1	1	1	1	1	1	1	5	5	5	5	5	0.403207	1	44	1	12	3	5	84700	164100	1	1	1
2020	197	1	1	0	1	1	0	1	2	1	3	5	5	5	0.183208	1	42	1	9	3	5	140000	143400	0	0	0
2022	197	1	0	0	1	1	0	1	2	1	1	5	5	5	0.0677666	0	44	1	9	3	5	84700	164100	1	1	1
2020	198	1	0	0	1	1	0	1	4	4	4	4	4	5	0.0916918	0	47	1	9	3	4	33560	116680	1	0	0
2022	198	1	0	0	1	1	0	1	2	5	5	4	5	5	0.0876518	0	49	1	9	3	4	49540	37400	1	0	1
2020	199	1	0	0	0	0	0	1	2	2	4	4	3	4	0.0270262	1	25	0	15	2	4	33560	116680	1	0	0
2022	199	1	0	0	1	1	0	1	2	5	5	5	5	5	0.0882846	1	27	1	15	2	4	49540	37400	1	0	0
2020	200	1	1	1	1	0	0	1	3	3	4	4	2	4	0.256654	0	18	0	12	2	4	33560	116680	1	0	1
2022	200	1	1	1	1	1	0	1	5	5	5	5	5	5	0.319888	0	20	0	14	3	4	49540	37400	1	0	1
2020	201	1	0	0	1	0	0	1	3	5	3	5	5	5	0.0535367	0	42	1	9	3	6	189000	142500	1	0	1
2022	201	1	0	0	1	0	0	1	1	3	2	4	3	4	0.0280111	0	44	1	9	3	5	87800	100000	1	0	0
2020	202	1	0	0	1	1	0	1	7	3	5	5	5	5	0.110059	0	54	1	6	3	3	180400	40000	1	0	0
2022	202	1	0	0	1	1	0	1	1	1	2	4	1	2	0.0501458	0	56	1	6	3	2	51700	90000	1	0	1
2020	203	1	1	0	1	1	0	1	5	5	5	5	5	5	0.215856	1	28	1	12	3	8	45500	60000	1	0	1
2022	203	1	1	0	1	1	0	1	3	5	5	5	5	5	0.204815	1	30	1	12	3	7	61000	150000	1	0	0
2020	204	1	0	0	0	0	0	1	1	3	3	3	3	3	0.0195052	0	34	1	12	3	5	26496	100800	1	0	1
2022	204	1	0	0	1	0	0	1	1	3	3	3	3	3	0.0275281	1	36	1	12	3	5	18790	85600	1	0	1
2020	205	1	1	0	0	1	0	1	5	3	3	4	4	4	0.193003	0	34	1	12	1	5	26496	100800	1	0	1
2022	205	1	1	0	1	1	1	1	5	5	2	5	5	5	0.314609	1	36	1	11	3	5	18790	85600	1	0	1
2020	206	1	0	0	0	0	0	1	4	3	3	3	3	3	0.0360665	0	53	1	11	2	2	89620	32100	0	0	1
2022	206	1	0	0	0	0	0	1	1	1	2	2	2	2	0.0068918	0	55	1	11	1	2	44780	52070	0	0	1
2020	207	1	0	0	0	1	0	1	1	3	4	5	5	4	0.0646321	0	30	1	8	3	6	64500	82900	0	0	1
2022	207	1	0	1	1	0	0	1	1	5	4	5	1	4	0.139193	0	32	1	8	3	5	77260	80500	0	0	1
2020	208	1	1	1	1	1	1	1	1	5	2	3	2	4	0.387614	0	17	0	11	3	4	29960	129070	1	0	1
2022	208	1	1	1	1	1	1	1	3	3	2	4	5	5	0.40114	0	19	0	13	2	3	51740	100000	1	0	0
2020	209	1	0	0	1	1	0	1	4	2	3	3	3	3	0.0770125	0	47	1	9	2	4	29960	129070	1	0	1
2022	209	1	0	1	1	1	0	1	1	3	3	4	3	3	0.16803	0	49	1	9	3	3	51740	100000	1	0	1
2020	210	1	0	0	1	1	0	1	1	1	1	3	3	3	0.053106	0	38	1	9	1	6	101400	45000	0	0	1
2022	210	1	0	0	1	0	0	1	1	3	3	3	3	3	0.0275281	0	40	1	9	3	4	29460	70000	0	0	0
2020	211	1	0	0	0	0	0	1	2	1	2	3	1	3	0.0132395	0	43	1	12	1	6	101400	45000	0	0	1
2022	211	1	0	0	1	0	0	1	3	4	4	5	3	5	0.0490959	0	45	1	12	3	4	29460	70000	0	0	1
2020	212	1	0	0	1	1	0	1	1	3	3	5	5	3	0.0683734	0	42	1	7	4	3	39100	73700	1	0	0
2022	212	1	0	0	0	1	0	1	1	5	3	5	5	5	0.0703098	0	44	1	7	3	3	324600	85500	1	0	1
2020	213	1	0	0	1	0	0	1	1	5	3	5	5	5	0.0424958	0	42	1	9	3	3	39100	73700	1	0	0
2022	213	1	0	0	1	1	0	1	1	3	3	5	5	3	0.0683734	0	44	1	9	3	3	324600	85500	1	0	1
2020	214	1	0	0	1	1	1	1	7	2	3	2	1	2	0.192533	0	57	1	12	4	6	214740	196000	1	0	1
2022	214	1	0	0	1	1	1	1	1	4	4	5	4	4	0.179098	0	59	1	12	4	6	84080	121250	1	0	1
2020	215	1	0	0	1	1	0	1	3	5	4	4	4	5	0.0890851	0	35	1	9	3	6	214740	196000	1	0	0
2022	215	1	0	0	1	1	0	1	1	3	3	5	5	5	0.0725052	0	37	1	9	3	6	84080	121250	1	0	1
2020	216	1	0	0	1	0	0	1	1	3	3	5	3	4	0.0308596	0	37	1	9	4	6	214740	196000	1	0	1
2022	216	1	0	0	1	1	0	1	1	4	4	5	5	4	0.0755688	0	39	1	9	4	6	84080	121250	1	0	1
2020	217	1	0	0	1	1	0	1	1	3	3	5	4	3	0.066502	0	55	1	8	1	6	93700	179470	1	0	1
2022	217	1	0	0	1	0	0	1	2	1	5	5	1	5	0.033307	0	57	1	8	1	2	126796	127840	1	0	1
2020	218	1	0	0	1	1	0	1	3	2	5	5	5	5	0.0850637	0	33	1	8	3	4	50020	90300	0	0	0
2022	218	1	0	0	1	1	0	1	3	2	5	4	5	5	0.0844309	0	35	1	8	2	4	90300	120000	0	0	0
2020	219	1	0	0	0	0	0	1	5	4	4	5	5	5	0.0558566	0	47	1	12	3	4	30400	50000	1	0	1
2022	219	1	0	0	0	0	0	1	1	3	3	5	3	1	0.016639	0	49	1	12	3	4	38380	93100	1	0	1
2020	220	1	0	1	1	1	0	1	1	4	5	5	5	5	0.183883	0	22	1	9	4	5	80980	97600	1	0	0
2022	220	1	0	0	1	0	0	1	2	5	5	5	5	5	0.0524477	0	24	1	9	1	5	49804	70000	0	0	0
2020	221	1	1	0	1	1	0	1	5	1	1	1	1	2	0.179123	0	29	0	12	4	5	80980	97600	1	0	0
2022	221	1	1	1	1	1	1	1	5	5	5	5	5	5	0.425289	0	31	0	9	4	5	49804	70000	0	0	0
2020	222	1	0	0	0	0	1	1	1	5	2	5	5	5	0.137658	0	53	1	9	1	9	124260	100000	1	0	1
2022	222	1	0	0	1	1	0	1	1	2	1	3	3	3	0.0560198	0	55	1	9	3	9	109498	100000	1	0	1
2020	223	1	0	0	1	0	0	1	3	5	5	5	5	5	0.0579681	0	52	1	9	3	9	124260	100000	1	0	1
2022	223	1	0	0	1	0	0	1	1	5	5	5	5	5	0.0469273	0	54	1	9	3	9	109498	100000	1	0	1
2020	224	1	0	1	1	0	0	1	1	5	3	5	5	5	0.146529	0	31	1	9	2	9	124260	100000	1	0	0
2022	224	1	0	1	1	0	0	1	2	5	2	5	4	5	0.147962	0	33	1	9	1	9	109498	100000	1	0	1
2020	225	1	0	0	1	1	0	1	5	3	3	4	3	4	0.0881454	0	30	1	10	3	9	124260	100000	1	0	1
2022	225	1	0	0	1	1	0	1	3	2	4	4	3	4	0.0764065	0	32	1	10	3	9	109498	100000	1	0	1
2020	226	1	1	1	1	1	0	1	2	4	3	4	4	4	0.291412	1	31	1	15	4	4	102400	150000	0	0	1
2022	226	1	1	0	1	0	1	1	3	4	4	4	5	5	0.268616	0	33	1	15	4	4	194800	204000	0	0	1
2020	227	1	0	0	1	1	1	1	6	3	3	4	4	3	0.198872	0	34	1	12	2	4	102400	150000	0	0	0
2022	227	1	1	0	1	0	1	1	1	4	1	5	4	4	0.247623	0	36	1	12	2	4	194800	204000	0	0	0
2020	228	1	0	0	1	1	0	1	1	2	2	4	3	2	0.0568024	0	37	0	9	2	5	46420	61300	1	0	1
2022	228	1	0	1	1	0	0	1	1	5	3	5	4	5	0.144657	0	39	0	9	2	5	51715	50000	1	0	1
2020	229	1	0	0	1	1	0	1	4	3	3	4	4	5	0.0865623	0	49	1	9	3	6	72550	90000	1	0	1
2022	229	1	1	0	1	1	0	1	3	4	3	5	4	5	0.195598	0	51	1	9	3	7	381450	350000	1	0	1
2020	230	1	0	0	1	1	0	1	4	5	5	4	5	5	0.0986927	0	27	1	10	2	6	72550	90000	1	0	0
2022	230	1	0	0	1	1	0	1	1	5	5	4	5	5	0.0821314	0	29	1	10	1	7	381450	350000	1	0	0
2020	231	1	0	0	1	1	0	1	3	3	4	5	3	3	0.0778872	0	34	1	9	2	4	99500	30000	0	0	1
2022	231	1	0	0	1	1	0	1	3	2	3	4	2	4	0.0723194	0	36	1	6	3	4	119600	60000	0	0	1
2020	232	1	0	0	1	1	0	1	7	2	5	5	5	5	0.107145	0	36	1	9	1	4	99500	30000	0	0	1
2022	232	1	0	0	1	1	0	1	7	3	5	5	5	5	0.110059	0	38	1	9	3	4	119600	60000	0	0	1
2020	233	1	0	0	1	1	0	1	2	3	5	4	2	4	0.0741442	0	38	1	9	2	6	60840	80000	0	0	1
2022	233	1	0	0	1	1	0	1	2	3	4	4	4	4	0.0756712	0	40	1	9	3	6	140580	400000	1	0	1
2020	234	1	0	0	0	0	0	1	1	5	5	5	5	5	0.0389043	0	52	1	9	4	6	73600	150000	1	0	1
2022	234	1	0	0	1	1	0	1	1	3	1	3	3	3	0.0589336	0	54	1	9	3	6	36060	28000	1	0	1
2020	235	1	0	0	0	0	0	1	1	5	5	5	5	5	0.0389043	0	31	1	7	5	6	73600	150000	1	0	0
2022	235	1	0	0	0	0	0	1	1	5	4	5	5	5	0.0366886	0	33	1	7	5	6	36060	28000	1	0	1
2020	236	1	0	0	0	0	0	1	1	3	2	3	3	2	0.0152235	0	30	1	9	3	6	73600	150000	1	0	0
2022	236	1	0	0	0	0	0	1	2	4	2	4	3	2	0.0242906	0	32	1	9	2	6	36060	28000	1	0	0
2020	237	1	0	0	1	1	0	1	4	3	3	5	3	5	0.0853237	0	54	1	9	3	6	145180	200000	0	0	1
2022	237	1	0	0	1	1	0	1	3	3	3	5	3	5	0.0798033	0	56	1	9	3	6	49904	172000	0	0	1
2020	238	1	1	1	1	1	0	1	4	5	5	5	5	5	0.314368	0	30	1	9	3	6	145180	200000	0	0	1
2022	238	1	0	1	1	1	0	1	5	1	4	5	1	5	0.187522	0	32	1	9	4	6	49904	172000	0	0	1
2020	239	1	0	0	1	1	0	1	4	3	4	5	5	5	0.0912822	0	26	1	12	2	5	137760	94725	1	0	0
2022	239	1	0	0	1	1	0	1	5	3	4	5	4	4	0.0928653	0	28	1	12	4	6	252528	200000	1	0	1
2020	240	1	0	0	1	0	0	1	7	4	3	3	4	4	0.0675018	0	30	1	10	2	6	145180	200000	0	0	0
2022	240	1	0	0	1	1	0	1	6	4	4	4	4	5	0.102733	0	32	1	10	3	6	49904	172000	0	0	0
2020	241	1	0	0	1	1	0	1	3	4	4	5	5	5	0.0886756	0	47	1	6	3	6	87140	110000	0	0	1
2022	241	1	0	1	1	0	0	1	2	5	5	5	3	5	0.152738	0	49	1	6	3	6	124240	124440	1	0	0
2020	242	1	0	1	1	0	0	1	1	3	1	5	3	5	0.132527	0	44	1	9	1	6	87140	110000	0	0	1
2022	242	1	0	1	1	0	0	1	5	5	5	5	5	3	0.16891	0	46	1	9	3	6	124240	124440	1	0	1
2020	243	1	0	0	0	1	0	1	1	1	5	5	5	5	0.0630861	0	28	1	9	4	3	8985	50000	0	0	0
2022	243	1	0	0	1	1	0	1	1	5	5	5	5	5	0.0827642	1	30	1	9	5	3	49800	52820	0	0	0
2020	244	1	0	1	1	0	1	1	1	3	3	4	5	5	0.245469	0	30	1	8	3	3	8985	50000	0	0	0
2022	244	1	0	1	1	1	0	1	1	1	3	3	2	5	0.163831	0	32	1	8	3	3	49800	52820	0	0	1
2020	245	1	1	1	1	0	0	1	3	4	4	4	4	5	0.265377	0	32	1	10	3	6	142400	50200	1	0	1
2022	245	1	0	1	1	1	1	1	2	4	3	4	3	5	0.285997	0	34	1	9	4	6	168200	83220	1	0	1
2020	246	1	1	1	1	0	0	1	3	5	5	5	5	5	0.273011	1	31	1	15	4	3	132600	210000	0	0	0
2022	246	1	0	0	1	1	0	1	2	4	5	5	5	5	0.0853708	0	33	1	15	3	3	135100	300000	0	0	0
2020	247	1	0	1	1	1	1	1	3	1	2	5	5	5	0.284936	0	30	1	9	2	3	225760	83000	1	0	0
2022	247	1	0	0	1	1	1	1	3	1	1	5	2	5	0.173073	0	32	1	9	1	4	50180	5000	1	0	0
2020	248	1	1	0	1	0	0	1	6	4	2	5	5	2	0.16978	0	33	1	9	3	4	25320	17500	0	0	0
2022	248	1	0	0	1	0	0	1	1	1	2	4	4	4	0.0240549	0	35	1	8	2	3	16190	20000	0	0	0
2020	249	1	0	1	1	1	0	1	1	5	5	5	5	4	0.184731	0	25	0	15	2	1	50000	70000	0	0	1
2022	249	1	0	1	1	1	1	1	3	5	5	5	5	4	0.301172	0	27	1	15	3	1	42760	50000	0	0	0
2020	250	1	1	0	1	1	1	1	7	4	4	5	4	3	0.321164	0	23	0	16	3	3	53540	63000	0	0	1
2022	250	1	1	0	1	1	1	1	2	3	4	4	4	2	0.28795	0	25	0	16	3	3	20640	83100	1	0	1
2020	251	1	0	0	1	0	0	1	3	3	3	5	5	5	0.0477091	0	52	1	6	3	2	42800	31200	1	0	0
2022	251	1	0	0	0	0	0	1	3	3	3	5	5	4	0.0376203	0	54	1	6	3	5	52180	70000	1	0	1
2020	252	1	0	0	1	1	1	1	6	5	4	5	5	4	0.211485	0	31	0	15	3	1	123240	36000	0	0	0
2022	252	1	1	0	1	1	1	1	1	5	3	4	4	4	0.290173	1	33	0	15	3	5	52180	70000	1	0	0
2020	253	1	0	0	1	1	1	1	4	4	4	5	5	5	0.199596	0	36	1	11	3	6	272660	252000	0	0	1
2022	253	1	0	0	1	0	0	1	1	5	4	4	4	4	0.0401415	0	38	1	11	3	6	198936	120300	1	0	1
2020	254	1	1	0	1	1	1	1	6	5	2	5	4	4	0.316192	0	33	1	12	4	6	272660	252000	0	0	1
2022	254	1	1	0	1	1	1	1	4	5	3	5	5	5	0.311304	0	35	1	9	5	6	198936	120300	1	0	1
2020	255	1	0	1	1	1	1	1	2	3	4	4	4	5	0.28717	0	35	0	12	3	4	64896	151720	1	0	0
2022	255	1	0	1	1	1	1	1	1	5	3	5	4	2	0.279697	1	37	0	9	2	4	104700	101555	1	0	1
2020	256	1	0	0	1	1	0	1	1	3	3	5	3	5	0.0687624	0	32	1	6	2	6	60000	100828	1	0	0
2022	256	1	0	0	1	0	0	1	1	3	3	3	3	3	0.0275281	0	34	1	6	2	6	37500	144335	1	0	0
2020	257	1	0	0	1	0	0	1	1	4	4	5	4	5	0.0399264	0	47	1	9	3	2	64200	152300	1	0	1
2022	257	1	0	0	0	0	0	1	1	5	5	5	4	4	0.0349671	0	49	1	9	4	2	50980	210800	1	0	1
2020	258	1	1	0	1	0	0	1	2	1	3	3	1	1	0.130356	0	49	1	12	3	2	64200	152300	1	0	1
2022	258	1	1	0	1	1	0	1	1	5	5	5	5	5	0.193774	0	51	1	12	3	2	50980	210800	1	0	1
2020	259	1	0	0	1	1	1	1	1	5	5	4	5	4	0.185466	1	25	0	16	4	3	97420	65000	0	0	1
2022	259	1	1	1	1	1	1	1	2	4	5	4	5	3	0.401049	0	27	0	16	4	3	18900	83600	1	0	1
2020	260	1	0	0	1	0	0	1	7	1	1	1	1	5	0.0495151	0	52	1	9	4	3	100120	410000	0	1	0
2022	260	1	0	0	1	1	0	1	3	5	5	5	5	5	0.093805	0	54	1	9	4	4	319400	150000	0	0	1
2020	261	1	0	0	1	0	0	1	6	4	5	5	5	5	0.0716157	0	52	1	9	3	3	100120	410000	0	1	1
2022	261	1	0	0	1	1	0	1	1	2	5	5	5	5	0.0740228	0	54	1	9	3	4	319400	150000	0	0	1
2020	262	1	1	0	1	0	1	1	1	5	5	5	5	5	0.263337	0	28	0	15	2	3	100120	410000	0	1	0
2022	262	1	0	0	1	0	0	1	1	5	5	5	5	5	0.0469273	0	30	1	15	1	4	319400	150000	0	0	0
2020	263	1	0	0	1	1	0	1	4	5	1	4	5	5	0.0898298	0	25	1	15	3	5	51740	60000	1	0	1
2022	263	1	0	0	1	1	0	1	2	3	4	5	4	4	0.076304	0	27	1	15	3	5	69800	143400	0	0	0
2020	264	1	0	0	1	0	0	1	7	1	1	5	5	5	0.0595319	0	44	0	6	4	1	57820	11400	0	0	0
2022	264	1	0	0	1	1	0	1	5	5	3	5	5	5	0.100415	0	46	0	6	3	1	7480	30000	0	0	0
2020	265	1	1	1	1	0	1	1	7	3	4	2	3	4	0.384742	0	32	0	9	4	3	23580	120730	1	0	1
2022	265	1	1	1	1	0	0	1	6	5	3	3	4	1	0.27374	0	34	0	9	3	3	17060	102090	1	0	1
2020	266	1	0	1	1	0	1	1	2	5	5	5	5	5	0.261881	0	43	1	9	3	4	51600	84050	1	0	1
2022	266	1	0	1	1	0	1	1	3	4	3	4	4	4	0.255486	1	45	1	9	3	4	149600	110930	1	0	1
2020	267	1	0	0	1	0	0	1	1	5	5	5	5	5	0.0469273	0	44	1	6	4	4	51600	84050	1	0	1
2022	267	1	0	0	1	0	0	1	1	5	5	5	4	5	0.0450559	0	46	1	0	4	4	149600	110930	1	0	0
2020	268	1	0	0	1	1	0	1	1	4	2	4	4	4	0.0686332	0	38	1	9	1	6	41700	68000	1	0	0
2022	268	1	0	1	1	0	0	1	1	5	4	5	5	5	0.148744	0	40	1	6	3	6	25000	117280	1	0	1
2020	269	1	0	0	1	1	1	1	2	1	5	5	5	5	0.18203	0	40	1	9	3	1	50000	80000	1	0	0
2022	269	1	0	0	1	0	0	1	1	2	5	5	5	3	0.0340541	0	42	1	9	3	1	71940	100600	0	0	1
2020	270	1	0	1	0	0	0	1	2	1	3	5	3	5	0.128628	0	26	1	9	5	6	10750	54350	1	0	0
2022	270	1	1	0	1	1	0	1	3	2	4	4	3	3	0.18535	0	28	1	12	3	3	4510	43000	1	0	1
2020	271	1	0	1	0	0	0	1	2	3	5	5	5	5	0.14263	0	25	0	9	2	6	10750	54350	1	0	0
2022	271	1	0	0	1	0	0	1	1	5	3	3	3	3	0.0333556	0	27	1	9	2	3	10860	20000	0	0	0
2020	272	1	0	0	1	0	0	1	2	3	3	5	2	4	0.0345087	0	31	1	12	3	3	54760	90000	0	0	0
2022	272	1	1	0	1	1	0	1	2	5	4	5	5	5	0.197078	1	33	0	9	2	3	90940	100000	0	0	1
2020	273	1	0	0	1	0	0	1	3	3	3	5	4	4	0.0437719	0	46	1	6	3	2	64896	70000	1	0	0
2022	273	1	0	0	1	1	0	1	2	5	3	5	5	4	0.0817873	0	48	1	6	2	2	16900	50000	1	0	1
2020	274	1	0	0	1	0	0	1	5	5	5	5	5	4	0.0669431	0	42	1	9	3	3	122120	100000	0	0	1
2022	274	1	0	0	1	1	0	1	2	5	5	5	5	5	0.0882846	0	44	1	9	3	2	30060	65000	0	0	0
2020	275	1	0	0	1	0	0	1	1	1	1	5	3	2	0.0164688	0	57	1	9	4	2	7070	15000	0	0	1
2022	275	1	0	0	1	1	0	1	1	5	5	5	5	5	0.0827642	0	59	1	9	1	2	32410	10000	0	0	1
2020	276	1	0	0	1	0	0	1	1	4	5	5	5	5	0.0440135	0	51	1	9	3	2	7070	15000	0	0	0
2022	276	1	0	0	1	0	0	1	1	5	2	5	4	4	0.0363428	0	53	1	9	1	2	32410	10000	0	0	0
2020	277	1	0	0	1	0	0	1	2	5	2	5	2	2	0.0339887	0	50	1	9	2	3	8180	32100	1	0	1
2022	277	1	0	0	1	0	0	1	1	5	5	5	4	5	0.0450559	0	52	1	9	2	5	18500	30000	1	0	1
2020	278	1	0	0	1	0	0	1	1	1	3	4	4	4	0.0262706	0	31	1	7	1	6	24390	40000	1	0	0
2022	278	1	0	0	1	0	0	1	1	3	5	5	5	5	0.0410997	0	33	1	7	3	7	17800	30000	1	0	0
2020	279	1	0	0	1	0	0	1	1	1	1	5	1	1	0.0106601	0	58	1	6	3	2	6046	5000	1	0	0
2022	279	1	0	0	1	0	0	1	1	3	3	5	3	1	0.0246619	0	60	1	6	3	2	34884	30000	1	0	1
2020	280	1	0	0	1	0	0	1	1	2	4	4	4	4	0.0314001	0	36	1	9	2	3	55580	50000	0	0	0
2022	280	1	0	0	1	0	0	1	4	3	3	5	5	3	0.0490978	0	38	1	9	3	4	78400	50000	0	0	0
2020	281	1	0	0	1	0	0	1	1	2	2	5	3	2	0.0215983	0	54	1	7	2	4	10960	30000	1	0	1
2022	281	1	0	0	1	0	0	1	1	3	3	5	3	5	0.0329255	0	56	1	7	3	2	75000	12500	1	0	1
2020	282	1	0	0	1	1	0	1	1	1	3	5	1	3	0.0550603	0	32	1	12	3	6	16100	30000	1	0	1
2022	282	1	0	0	1	0	1	1	2	1	1	5	2	1	0.123452	0	34	1	12	2	6	25260	30000	1	0	1
2020	283	1	0	0	1	1	0	1	3	5	3	5	4	3	0.0833704	0	31	1	9	1	6	16100	30000	1	0	0
2022	283	1	0	0	1	0	0	1	3	5	3	5	5	5	0.0535367	0	33	1	9	2	6	25260	30000	1	0	0
2020	284	1	0	0	1	1	0	1	1	3	4	5	5	2	0.0685232	0	57	1	6	3	4	33760	43300	1	0	1
2022	284	1	0	0	1	1	0	1	2	5	5	5	5	5	0.0882846	0	59	1	6	1	4	45600	40000	1	0	1
2020	285	1	0	0	1	0	0	1	1	3	3	5	3	3	0.0287937	0	56	1	6	3	4	33760	43300	1	0	1
2022	285	1	0	0	1	1	0	1	1	5	5	5	5	5	0.0827642	0	58	1	6	1	4	45600	40000	1	0	1
2020	286	1	0	0	1	1	0	1	4	3	4	3	5	5	0.0900166	0	56	1	12	2	3	13220	20000	1	0	1
2022	286	1	0	1	1	1	1	1	5	5	5	5	5	5	0.314279	0	58	1	12	1	3	69540	20380	1	0	1
2020	287	1	0	1	1	1	0	1	7	1	4	5	4	5	0.204177	0	29	1	16	1	3	43740	85700	0	0	0
2022	287	1	0	1	1	1	0	1	5	5	4	5	5	5	0.206663	0	31	1	16	2	4	73900	50000	0	0	0
2020	288	1	0	0	1	0	1	1	4	2	3	5	4	3	0.149713	0	43	1	9	3	5	47408	54000	1	0	1
2022	288	1	1	0	1	0	1	1	1	2	3	4	2	4	0.241852	0	45	1	6	3	5	211240	75000	1	0	1
2020	289	1	0	0	1	0	0	1	4	3	3	3	3	4	0.0461553	0	36	1	12	3	5	81500	65000	1	0	0
2022	289	1	0	0	1	1	0	1	1	1	4	5	4	4	0.064956	0	38	1	12	2	5	102380	73000	1	0	1
2020	290	1	0	0	1	1	0	1	2	5	3	5	4	5	0.0819818	0	34	1	9	3	5	81500	65000	1	0	0
2022	290	1	0	0	1	0	0	1	3	3	3	3	4	4	0.0425062	0	36	1	9	3	5	102380	73000	1	0	0
2020	291	1	0	0	1	1	0	1	2	3	3	5	3	5	0.0742828	0	40	1	7	4	4	54020	131600	1	0	1
2022	291	1	0	0	1	1	0	1	1	3	3	5	4	4	0.0685679	0	42	1	9	3	4	550000	135000	1	0	1
2020	292	1	0	1	1	1	0	1	7	5	4	5	5	5	0.217704	0	40	1	9	3	4	54020	131600	1	0	0
2022	292	1	0	0	1	1	0	1	1	3	3	5	4	5	0.0706338	0	42	1	9	3	4	550000	135000	1	0	1
2020	293	1	1	0	1	0	1	1	5	4	5	5	5	3	0.278373	0	37	1	9	4	7	30000	30000	1	0	0
2022	293	1	1	0	1	1	1	1	3	3	3	4	4	3	0.29332	0	39	1	9	3	6	41130	69540	1	0	1
2020	294	1	1	0	0	0	0	1	5	3	3	4	5	5	0.161104	0	38	1	12	3	7	30000	30000	1	0	0
2022	294	1	0	0	1	0	0	1	3	4	4	5	5	5	0.0528386	0	40	1	12	3	6	41130	69540	1	0	0
2020	295	1	0	0	1	0	0	1	5	5	3	5	5	5	0.0645776	0	40	1	9	3	8	29040	30000	1	0	1
2022	295	1	0	0	1	1	1	1	5	5	3	5	5	5	0.205815	0	42	1	9	4	6	75000	39592	1	0	1
2020	296	1	0	0	1	1	0	1	3	5	3	5	5	3	0.0852418	0	44	1	9	3	4	149196	50000	0	1	1
2022	296	1	0	0	1	0	0	1	2	5	3	4	4	5	0.0455121	0	46	1	9	3	3	206390	530000	0	0	1
2020	297	1	0	1	1	1	0	1	5	5	3	3	5	3	0.19905	0	39	1	7	3	4	149196	50000	0	1	1
2022	297	1	0	1	1	1	0	1	4	1	2	4	3	4	0.178615	0	41	1	9	2	3	206390	530000	0	0	0
2020	298	1	1	0	1	1	1	1	7	5	4	4	4	3	0.323445	1	54	1	15	4	3	68360	69600	1	0	1
2022	298	1	1	0	1	1	1	1	2	4	3	4	4	4	0.292779	0	56	1	15	4	2	33790	100700	1	0	1
2020	299	1	0	1	1	1	0	1	5	3	3	4	4	4	0.19405	0	52	1	6	2	3	68360	69600	1	0	1
2022	299	1	0	1	1	1	0	1	5	5	5	5	5	4	0.206813	0	53	1	6	1	2	33790	100700	1	0	1
2020	300	1	0	0	1	0	0	1	3	3	3	4	4	4	0.043139	0	41	1	9	3	5	95800	130000	1	0	0
2022	300	1	0	0	1	1	0	1	2	1	3	3	3	5	0.0671897	0	43	1	9	3	4	50000	100000	1	0	1
2020	301	1	0	0	1	1	0	1	3	5	4	5	5	4	0.0895234	0	40	1	9	2	5	95800	130000	1	0	0
2022	301	1	0	0	1	1	0	1	1	2	4	5	2	5	0.066193	0	42	1	9	4	4	50000	100000	1	0	0
2020	302	1	0	0	1	1	0	1	4	5	2	5	5	5	0.0926783	0	50	1	7	2	3	396720	264800	1	1	0
2022	302	1	0	0	1	1	0	1	2	2	4	4	2	5	0.0710806	0	52	1	7	3	3	426800	326550	1	1	1
2020	303	1	1	1	1	1	1	1	3	5	3	5	5	4	0.407751	0	24	0	16	3	3	396720	264800	1	1	0
2022	303	1	1	1	1	1	1	1	7	5	4	5	5	4	0.432048	0	26	0	16	3	3	426800	326550	1	1	0
2020	304	1	1	0	1	0	1	1	3	5	3	5	3	5	0.266204	0	35	1	15	1	8	149240	80800	1	0	1
2022	304	1	1	0	1	0	1	1	2	5	3	5	5	5	0.264426	1	37	1	15	1	8	254000	300000	1	0	1
2020	305	1	1	0	0	0	0	1	1	4	4	5	5	1	0.136521	1	54	1	12	3	5	36100	36900	1	0	1
2022	305	1	1	0	1	0	0	1	2	5	5	5	5	1	0.155194	0	56	1	12	3	5	24740	35300	0	0	1
2020	306	1	1	1	1	0	0	1	3	2	3	4	4	2	0.251136	0	26	0	9	3	5	36100	36900	1	0	0
2022	306	1	1	1	1	1	0	1	3	2	3	4	2	2	0.28323	0	28	0	9	3	5	24740	35300	0	0	1
2020	307	1	0	0	1	0	0	1	4	2	3	3	3	2	0.0391097	0	42	1	9	3	4	93660	80000	0	0	1
2022	307	1	0	0	1	1	0	1	2	1	1	5	5	5	0.0677666	0	44	1	9	5	4	26500	100000	1	0	0
2020	308	1	0	1	1	1	0	1	2	5	5	5	5	5	0.192317	0	51	1	9	3	4	101000	175000	1	0	1
2022	308	1	0	1	1	1	0	1	2	3	5	5	5	5	0.18649	0	53	1	9	2	7	11000	168500	1	0	1
2020	309	1	0	0	1	1	1	1	5	3	3	5	4	3	0.193984	0	47	1	9	4	4	46460	65600	0	0	0
2022	309	1	0	0	1	0	0	1	3	5	3	5	5	5	0.0535367	0	49	1	12	2	4	72600	143200	1	0	1
2020	310	1	0	1	1	1	0	1	2	3	3	5	2	2	0.170246	0	47	1	9	3	4	46460	65600	0	0	0
2022	310	1	0	1	0	0	0	1	1	1	1	3	1	1	0.105404	0	49	1	9	3	4	72600	143200	1	0	1
2020	311	1	0	0	1	0	1	1	2	1	5	5	5	3	0.142061	0	48	1	9	3	4	42000	93790	1	0	1
2022	311	1	0	0	1	0	0	1	7	3	3	5	4	2	0.0617218	0	50	1	9	3	4	50000	70000	1	0	1
2020	312	1	1	0	1	1	0	1	2	1	3	5	5	5	0.183208	0	26	0	9	1	4	42000	93790	1	0	0
2022	312	1	1	1	1	0	0	1	2	2	4	5	3	5	0.25279	1	28	0	10	3	4	50000	70000	1	0	0
2020	313	1	0	0	0	0	0	1	3	4	2	5	3	3	0.0325097	0	40	1	9	4	4	35080	29000	1	0	1
2022	313	1	0	0	0	0	0	1	4	5	4	5	5	5	0.0532499	0	42	1	9	3	4	37380	30000	1	0	1
2020	314	1	1	0	0	1	0	1	2	4	4	4	4	4	0.181572	0	29	1	9	3	2	107100	40840	1	0	1
2022	314	1	0	0	1	0	0	1	2	3	4	5	4	5	0.042533	0	51	1	9	2	2	105960	12000	1	0	1
2020	315	1	0	0	1	1	0	1	2	3	4	5	3	5	0.0764986	0	47	1	9	4	2	107100	40840	1	0	1
2022	315	1	0	0	1	0	0	1	2	3	3	5	5	4	0.0401228	0	49	1	9	3	2	105960	12000	1	0	1
2020	316	1	0	0	0	0	0	1	1	2	2	3	2	1	0.0083725	0	56	1	9	3	7	86840	111000	1	0	0
2022	316	1	0	0	0	0	0	1	1	1	1	5	1	1	0.0026372	0	58	1	9	2	9	30000	400000	1	0	1
2020	317	1	1	0	1	1	1	1	4	5	4	5	5	5	0.31352	0	33	1	16	3	7	86840	111000	1	0	0
2022	317	1	1	0	1	0	1	1	1	5	4	5	5	5	0.261122	1	35	1	15	3	9	30000	400000	1	0	0
2020	318	1	0	0	1	1	0	1	7	5	3	5	5	5	0.111455	0	38	1	9	2	5	37500	52000	1	0	0
2022	318	1	0	0	1	1	1	1	6	5	5	5	5	5	0.215767	0	40	1	9	3	5	103500	121000	1	0	1
2020	319	1	0	0	1	0	1	1	5	3	3	4	4	3	0.157514	0	37	1	12	4	7	51440	70000	1	0	0
2022	319	1	0	0	1	0	0	1	1	5	4	5	5	4	0.0426456	0	39	1	12	3	7	86104	65000	1	0	1
2020	320	1	0	0	0	0	0	1	1	2	3	4	2	3	0.0153528	0	35	1	9	3	7	51440	70000	1	0	0
2022	320	1	0	0	1	0	0	1	1	4	4	5	4	4	0.0378605	0	37	1	6	4	7	86104	65000	1	0	1
2020	321	1	0	1	1	0	1	1	1	3	4	5	2	2	0.236505	0	35	1	15	2	5	108500	100000	0	0	0
2022	321	1	0	1	1	0	1	1	2	3	4	4	4	5	0.251333	1	37	1	15	2	5	122496	100000	1	0	1
2020	322	1	0	0	1	1	1	1	1	5	1	5	4	3	0.173298	0	25	0	15	3	5	36600	220000	1	0	0
2022	322	1	0	0	0	0	0	1	1	4	3	4	3	1	0.0189199	1	27	0	15	1	5	86200	104600	0	0	1
2020	323	1	1	1	1	1	0	1	4	4	4	3	3	4	0.302164	0	19	0	13	2	5	36600	220000	1	0	0
2022	323	1	0	1	1	1	0	1	1	5	5	4	4	2	0.178095	0	21	0	15	2	5	86200	104600	0	0	0
2020	324	1	1	0	1	0	0	1	1	3	3	3	3	3	0.138538	0	32	1	16	3	8	63340	80650	1	0	1
2022	324	1	1	1	1	0	0	1	2	5	5	3	4	4	0.262287	0	34	1	16	2	9	88570	126300	1	0	1
2020	325	1	0	0	1	1	0	1	1	5	5	5	5	5	0.0827642	0	31	1	15	3	8	63340	80650	1	0	0
2022	325	1	0	0	1	1	0	1	1	5	3	4	4	4	0.0737626	1	33	1	15	2	9	88570	126300	1	0	1
2020	326	1	0	0	1	0	0	1	6	5	3	2	5	3	0.0640678	0	29	1	16	3	8	63340	80650	1	0	0
2022	326	1	0	0	1	0	0	1	5	5	2	3	3	5	0.0573535	0	31	1	16	5	9	88570	126300	1	0	0
2020	327	1	0	0	0	1	0	1	5	5	5	5	5	5	0.096823	0	57	1	12	3	2	16405	15100	1	0	1
2022	327	1	0	0	1	0	0	1	1	2	2	5	4	4	0.0276015	0	59	1	12	3	2	23964	4800	1	0	1
2020	328	1	0	0	0	0	1	1	1	4	5	1	5	4	0.136794	0	28	0	0	1	3	18540	147600	0	0	1
2022	328	1	0	0	1	0	1	1	4	4	4	5	5	5	0.16376	0	30	0	0	2	3	29000	49680	0	0	1
2020	329	1	0	0	1	1	0	1	5	3	5	5	4	5	0.097147	0	53	1	9	3	2	23608	19800	1	0	0
2022	329	1	0	0	1	1	1	1	7	2	5	5	5	5	0.212546	0	55	1	9	3	2	45224	55400	1	0	1
2020	330	1	1	0	1	1	1	1	7	3	5	5	5	5	0.326469	0	33	1	15	3	3	74830	50000	0	0	0
2022	330	1	1	0	1	1	1	1	6	4	3	5	4	2	0.311362	0	35	1	15	3	3	138120	69000	0	0	1
2020	331	1	0	0	1	1	0	1	5	4	4	5	5	4	0.0976505	0	28	1	12	3	3	67000	70000	0	0	0
2022	331	1	0	1	1	1	0	1	2	5	5	5	5	4	0.190251	0	30	1	12	3	3	7000	76700	0	0	0
2020	332	1	0	0	1	0	0	1	4	5	5	5	5	5	0.0634886	0	59	1	12	4	2	180550	82130	1	0	0
2022	332	1	0	0	1	0	0	1	3	5	5	5	5	4	0.0559022	1	61	1	12	4	2	64540	100400	1	0	0
2020	333	1	0	0	0	0	0	1	3	4	2	3	4	2	0.0310496	0	52	1	9	3	5	55950	28000	1	0	1
2022	333	1	0	0	1	0	1	1	2	2	2	3	2	2	0.129382	0	54	1	9	3	5	13750	25000	1	0	0
2020	334	1	0	0	1	1	0	1	7	2	2	5	2	3	0.0907523	0	26	0	9	2	3	64130	30000	1	0	0
2022	334	1	0	0	1	1	1	1	5	5	2	5	5	5	0.203599	0	28	0	9	2	3	62220	75000	1	0	1
2020	335	1	0	0	1	1	0	1	3	5	5	5	5	4	0.0917391	0	55	1	12	3	5	67540	140000	1	0	1
2022	335	1	0	0	1	1	0	1	2	5	5	5	5	4	0.0862187	0	57	1	12	2	5	94820	135000	1	0	1
2020	336	1	1	0	1	1	0	1	2	2	3	4	4	1	0.175354	0	26	1	12	3	5	67540	140000	1	0	1
2022	336	1	0	0	1	1	0	1	2	3	3	4	4	4	0.0734555	0	28	1	12	2	5	94820	135000	1	0	0
2020	337	1	1	1	1	1	0	1	2	5	5	5	5	5	0.303327	1	29	1	12	3	6	61780	82100	1	0	1
2022	337	1	1	0	1	1	1	1	1	5	4	5	5	5	0.296959	0	31	1	12	3	6	90740	350000	1	0	1
2020	338	1	0	0	1	1	0	1	2	3	3	5	5	4	0.0759597	0	31	1	9	3	3	59654	35000	1	0	0
2022	338	1	0	1	1	1	0	1	2	5	3	5	5	5	0.187886	0	33	1	9	2	3	59460	45000	0	0	0
2020	339	1	0	1	1	1	0	1	1	3	3	3	3	2	0.165332	0	30	1	6	1	3	59654	35000	1	0	1
2022	339	1	0	0	1	1	0	1	2	3	3	3	4	2	0.0686909	0	32	1	6	1	3	59460	45000	0	0	0
2020	340	1	0	0	1	1	0	1	4	5	5	5	5	3	0.0951937	0	28	1	9	3	3	100880	86996	0	0	1
2022	340	1	0	1	1	1	0	1	3	1	4	5	3	3	0.176092	0	30	1	6	3	3	61080	100000	0	0	1
2020	341	1	0	0	1	1	0	1	3	5	5	5	5	5	0.093805	0	35	1	9	4	4	113400	100000	0	0	1
2022	341	1	0	0	1	1	1	1	2	4	4	5	5	5	0.188555	0	37	1	9	3	4	133120	150000	1	0	1
2020	342	1	0	1	1	0	0	1	1	1	3	4	4	3	0.128238	0	34	1	9	3	5	15980	129700	1	0	0
2022	342	1	0	1	1	1	0	1	1	5	2	3	5	5	0.178884	0	36	1	9	4	6	50000	88540	0	0	0
2020	343	1	0	1	1	1	0	1	5	4	4	4	5	5	0.203116	0	32	1	9	4	5	15980	129700	1	0	0
2022	343	1	0	0	1	1	0	1	6	3	4	5	4	3	0.0963199	0	34	1	9	3	6	50000	88540	0	0	0
2020	344	1	0	0	1	1	0	1	1	2	2	4	4	4	0.0628056	0	31	1	9	3	4	34700	47500	1	0	0
2022	344	1	0	0	1	1	0	1	1	2	2	4	3	2	0.0568024	1	33	1	9	3	3	49260	30000	1	0	1
2020	345	1	0	0	1	0	0	1	1	2	2	4	1	3	0.0192886	0	46	1	9	3	3	54960	72300	1	0	1
2022	345	1	0	0	1	1	0	1	1	2	2	4	1	2	0.0530596	0	48	1	6	3	3	31400	62000	0	0	1
2020	346	1	0	0	0	1	0	1	1	5	3	5	3	4	0.0645012	0	33	1	9	3	5	42070	50000	1	0	1
2022	346	1	0	0	1	1	0	1	1	4	3	4	4	3	0.068783	0	35	1	9	3	5	58680	64150	1	0	1
2020	347	1	0	0	1	1	0	1	3	4	3	4	4	2	0.0777579	0	42	1	9	3	5	42070	50000	1	0	0
2022	347	1	0	0	1	1	1	1	1	5	3	5	5	4	0.181667	0	44	1	7	3	5	58680	64150	1	0	1
2020	348	1	0	0	1	1	0	1	1	2	4	5	5	5	0.0718071	0	37	1	9	2	4	40000	45020	0	0	1
2022	348	1	0	0	1	1	0	1	2	1	4	5	5	4	0.0723479	0	39	1	9	2	4	30400	44000	0	0	1
2020	349	1	0	0	1	0	0	1	4	1	2	4	4	4	0.0406162	0	35	1	9	2	6	23640	36000	0	0	0
2022	349	1	0	0	1	0	0	1	1	4	3	4	2	2	0.0271374	0	37	1	9	3	6	27160	10000	1	0	0
2020	350	1	0	0	1	0	0	1	1	2	2	4	4	4	0.0269687	0	49	1	9	3	3	36380	86000	1	1	0
2022	350	1	0	0	1	1	0	1	1	5	5	5	5	5	0.0827642	0	51	1	9	3	3	66120	100000	1	0	1
2020	351	1	0	0	1	1	0	1	1	2	2	4	4	4	0.0628056	0	52	1	6	2	3	36380	86000	1	1	0
2022	351	1	0	0	1	1	0	1	1	1	3	5	3	3	0.058803	0	54	1	6	3	3	66120	100000	1	0	0
2020	352	1	0	0	1	0	0	1	1	3	3	4	4	4	0.0320982	0	42	1	12	3	5	32750	80000	1	0	0
2022	352	1	0	0	1	0	0	1	1	3	3	3	3	3	0.0275281	0	44	1	12	3	6	70000	70000	1	0	1
2020	353	1	0	0	1	1	0	1	1	3	4	4	4	4	0.0701508	0	53	1	9	2	3	151400	73730	0	1	1
2022	353	1	0	1	1	0	0	1	1	5	5	5	5	5	0.15096	0	55	1	9	2	4	100000	120000	1	0	1
2020	354	1	0	0	1	1	0	1	2	5	5	5	5	5	0.0882846	0	42	1	9	2	5	28040	47300	1	0	0
2022	354	1	0	0	1	1	0	1	2	3	5	5	5	5	0.082457	0	44	1	9	2	5	61300	53280	0	0	0
2020	355	1	0	0	1	0	1	1	4	3	3	5	4	4	0.154693	0	36	1	9	5	6	17210	113000	0	0	0
2022	355	1	0	0	1	0	0	1	7	4	4	4	5	4	0.0722217	0	38	1	9	4	6	131600	82700	1	0	0
2020	356	1	1	0	0	0	1	1	1	3	4	5	5	3	0.243139	0	35	1	11	3	6	17210	113000	0	0	0
2022	356	1	1	0	1	0	0	1	7	5	4	3	3	4	0.18177	0	37	1	12	2	6	131600	82700	1	0	0
2020	357	1	0	0	1	0	0	1	2	3	3	4	2	5	0.0359417	0	41	1	9	4	7	40780	60850	1	0	1
2022	357	1	0	0	1	1	0	1	3	5	5	5	3	3	0.0859305	0	43	1	6	2	6	96704	96600	1	0	0
2020	358	1	0	0	1	0	0	1	2	3	2	5	3	4	0.0341643	0	34	1	9	3	7	40780	60850	1	0	0
2022	358	1	0	0	1	0	1	1	1	2	3	5	2	1	0.125277	0	36	1	6	2	6	96704	96600	1	0	0
2020	359	1	0	0	1	1	0	1	2	5	5	5	5	5	0.0882846	0	32	0	6	3	3	37724	52320	1	0	1
2022	359	1	0	0	1	0	0	1	2	4	4	5	5	5	0.0473182	0	34	0	6	4	3	20394	60000	1	0	1
2020	360	1	0	0	1	1	0	1	2	4	3	4	3	3	0.072432	0	22	0	15	3	6	60280	40000	0	0	1
2022	360	1	1	0	1	1	0	1	2	4	3	5	5	4	0.189883	0	24	0	16	3	5	40000	30300	1	0	1
2020	361	1	0	0	1	0	0	1	1	2	4	5	1	2	0.022287	0	36	0	9	3	4	79416	20000	1	0	1
2022	361	1	0	0	0	0	0	1	1	2	2	3	3	1	0.0102439	0	38	0	9	2	4	38230	35000	1	0	1
2020	362	1	0	0	1	0	0	1	2	1	5	5	1	2	0.0271093	0	28	1	9	3	4	33640	50000	1	0	0
2022	362	1	0	1	1	0	0	1	1	5	5	5	1	5	0.143475	0	30	0	9	5	4	10000	50000	1	0	1
2020	363	1	0	0	1	0	0	1	2	2	5	5	3	3	0.0358318	0	24	1	9	4	4	33640	50000	1	0	0
2022	363	1	0	1	1	1	0	1	1	5	3	5	3	5	0.178623	0	26	1	9	2	4	10000	50000	1	0	0
2020	364	1	1	1	1	1	0	1	4	1	5	5	1	1	0.286964	0	16	0	9	5	4	108720	30000	1	0	0
2022	364	1	0	1	1	1	0	1	4	3	3	5	4	3	0.187096	0	18	0	9	3	2	2000	40000	0	0	0
2020	365	1	0	1	1	0	0	1	2	5	5	5	5	5	0.15648	0	25	1	9	2	5	38066	97900	1	0	0
2022	365	1	0	0	1	1	0	1	1	3	3	5	5	4	0.0704393	0	27	1	9	3	3	19484	25000	0	0	0
2020	366	1	0	1	1	0	0	1	4	5	5	5	5	5	0.167521	0	23	0	15	1	5	38066	97900	1	0	0
2022	366	1	0	1	1	1	0	1	2	5	5	5	5	5	0.192317	0	25	0	15	3	4	25100	61300	1	0	0
2020	367	1	0	0	1	0	0	1	1	2	2	3	3	4	0.0244645	0	29	1	12	3	5	102700	50000	0	0	1
2022	367	1	0	0	1	1	0	1	2	4	4	3	3	5	0.0781467	0	31	1	12	3	6	89100	50000	0	0	0
2020	368	1	0	0	1	1	0	1	5	3	4	5	5	4	0.0947367	0	27	1	12	5	5	102700	50000	0	0	0
2022	368	1	0	0	1	1	0	1	2	3	4	5	3	3	0.0723668	0	29	1	12	4	6	89100	50000	0	0	0
2020	369	1	0	0	1	0	0	1	1	5	5	5	5	4	0.0448614	0	26	0	6	3	2	8860	6200	0	0	0
2022	369	1	1	0	0	0	0	1	4	3	3	3	3	3	0.147076	0	28	0	6	3	2	8350	31020	0	0	0
2020	370	1	0	1	1	1	0	1	7	5	5	5	5	5	0.219919	0	37	1	12	3	3	150400	80000	0	0	1
2022	370	1	0	0	1	1	1	1	6	5	5	5	5	5	0.215767	0	39	1	12	3	3	118304	100000	0	0	1
2020	371	1	0	0	0	1	0	1	1	5	5	5	5	5	0.0747413	0	30	1	9	1	3	150400	80000	0	0	1
2022	371	1	0	0	0	0	0	1	2	1	3	1	5	5	0.025807	0	32	1	9	1	3	118304	100000	0	0	0
2020	372	1	0	1	1	1	0	1	2	1	5	5	3	1	0.168656	0	30	1	12	2	4	43168	40000	0	0	1
2022	372	1	0	0	1	1	0	1	1	1	5	5	3	5	0.0673663	0	32	1	12	2	4	39920	50000	0	0	1
2020	373	1	1	0	1	1	0	1	6	5	3	1	4	4	0.210476	0	28	1	9	2	4	43168	40000	0	0	0
2022	373	1	0	0	1	0	0	1	1	1	5	5	3	4	0.0294635	0	30	1	9	2	4	39920	50000	0	0	1
2020	374	1	0	0	1	0	0	1	2	5	5	5	5	5	0.0524477	0	57	1	9	5	2	27220	30000	0	0	1
2022	374	1	0	0	1	1	0	1	1	5	5	5	5	5	0.0827642	0	59	1	9	2	2	33104	48000	0	0	1
2020	375	1	1	1	1	0	0	1	2	5	5	5	5	5	0.26749	0	31	1	16	3	2	105200	240000	0	1	0
2022	375	1	1	0	1	1	0	1	1	4	4	5	4	4	0.184707	0	33	1	16	3	3	114420	325000	0	1	0
2020	376	1	0	0	1	1	0	1	4	4	3	5	5	5	0.0919803	0	56	1	12	3	8	10000	130000	0	0	1
2022	376	1	0	0	1	1	0	1	1	4	5	5	5	5	0.0798504	0	58	1	6	4	3	78400	52700	1	0	1
2020	377	1	0	0	1	1	0	1	1	4	5	4	5	3	0.0750858	1	30	1	15	3	8	10000	130000	0	0	0
2022	377	1	0	0	1	0	1	1	1	5	5	5	5	5	0.152328	1	32	1	15	5	3	78400	52700	1	0	1
2020	378	1	0	0	1	1	1	1	4	5	4	4	3	5	0.198135	1	29	1	15	3	4	405200	300000	0	1	1
2022	378	1	0	0	1	1	1	1	2	4	4	5	3	5	0.184813	1	31	1	12	3	4	107400	70000	0	0	1
2020	379	1	0	0	1	1	1	1	4	5	4	4	5	4	0.199811	0	36	1	12	3	6	77000	200000	1	0	1
2022	379	1	1	1	1	1	1	1	3	3	3	3	4	4	0.398786	0	38	1	12	2	6	142700	60000	1	0	1
2020	380	1	0	0	1	1	0	1	2	3	3	4	2	3	0.0676468	0	31	1	9	1	5	23660	44980	1	0	0
2022	380	1	0	0	1	1	0	1	4	3	2	5	2	1	0.072973	0	33	1	9	4	5	31096	56198	1	0	1
2020	381	1	0	0	0	0	0	1	1	3	4	5	3	5	0.0271183	0	45	1	9	3	5	77560	105200	0	0	0
2022	381	1	0	0	1	1	0	1	2	3	2	3	2	3	0.0647983	0	47	1	9	3	5	165740	65000	1	0	1
2020	382	1	0	0	0	1	1	1	2	3	5	5	5	5	0.179835	0	29	1	9	2	4	34220	50380	1	0	0
2022	382	1	0	0	1	1	1	1	2	3	1	5	5	5	0.178995	0	31	1	9	2	5	20000	52670	1	0	1
2020	383	1	0	0	1	1	1	1	4	3	3	4	3	4	0.188025	0	23	1	12	3	4	34220	50380	1	0	0
2022	383	1	0	0	1	1	0	1	2	4	4	5	4	4	0.0792178	0	25	1	9	4	5	20000	52670	1	0	1
2020	384	1	0	1	1	0	0	1	1	4	3	5	3	5	0.139872	0	50	1	9	3	3	16530	50000	0	0	0
2022	384	1	0	1	1	0	0	1	1	2	2	4	3	3	0.127064	0	52	1	9	3	4	41530	92400	1	0	1
2020	385	1	0	0	1	0	1	1	3	5	1	5	1	5	0.14702	0	36	1	9	2	6	18106	64300	1	0	1
2022	385	1	0	0	1	1	0	1	3	5	4	5	5	5	0.0915893	0	38	1	9	3	6	43220	65000	1	0	0
2020	386	1	0	0	1	0	0	1	1	3	3	5	3	3	0.0287937	0	33	1	9	2	6	18106	64300	1	0	0
2022	386	1	0	0	1	1	0	1	7	3	4	5	5	3	0.103712	0	35	1	8	1	6	43220	65000	1	0	0
2020	387	1	0	0	1	1	0	1	1	3	2	4	3	5	0.0659139	0	35	1	6	5	6	49040	30000	1	0	0
2022	387	1	0	0	1	1	0	1	2	1	1	3	3	2	0.0565605	0	37	1	6	3	6	55518	60000	1	0	1
2020	388	1	0	0	1	1	0	1	4	3	3	5	3	3	0.0811919	0	33	1	6	3	6	49040	30000	1	0	1
2022	388	1	0	0	1	1	1	1	5	1	1	5	5	5	0.189728	0	35	1	8	1	6	55518	60000	1	0	1
2020	389	1	1	0	1	1	1	1	3	4	3	4	4	4	0.2983	0	28	0	16	4	8	10000	164300	1	0	0
2022	389	1	1	0	1	1	1	1	4	1	4	4	4	4	0.297295	0	30	0	16	3	9	83220	166130	1	0	0
2020	390	1	0	1	1	1	0	1	3	3	4	4	3	4	0.183353	0	26	1	16	4	8	10000	164300	1	0	1
2022	390	1	0	1	1	0	0	1	2	3	4	4	3	3	0.13993	1	29	1	12	3	9	83220	166130	1	0	1
2020	391	1	0	0	1	1	0	1	4	4	5	4	4	5	0.0939075	0	25	1	9	3	8	10000	164300	1	0	1
2022	391	1	0	0	1	0	0	1	6	5	5	5	5	5	0.0745294	0	27	1	9	1	9	83220	166130	1	0	1
2020	392	1	1	0	1	1	0	1	5	3	5	5	5	3	0.205896	0	31	1	9	3	6	77480	80000	1	0	0
2022	392	1	0	0	1	1	0	1	3	2	3	4	3	4	0.0741908	0	33	1	12	2	6	92792	100000	1	0	0
2020	393	1	0	0	1	1	0	1	2	1	3	5	4	3	0.0661949	0	34	1	12	3	6	77480	80000	1	0	0
2022	393	1	0	0	1	1	1	1	1	3	3	4	4	4	0.173336	0	36	1	12	4	6	92792	100000	1	0	1
2020	394	1	0	0	1	1	1	1	1	5	5	5	5	5	0.188165	0	49	1	8	3	3	41920	90000	1	0	0
2022	394	1	0	0	1	1	0	1	2	5	3	5	5	5	0.0838532	0	51	1	8	3	3	20000	114600	0	0	0
2020	395	1	0	1	1	0	0	1	1	1	5	5	5	5	0.139305	1	29	0	12	1	3	41920	90000	1	0	1
2022	395	1	0	1	1	0	0	1	1	1	2	5	1	3	0.12104	0	31	0	12	2	3	20000	114600	0	0	1
2020	396	1	0	1	1	0	0	1	7	3	3	5	5	3	0.169692	0	33	1	9	2	4	56500	60000	0	0	0
2022	396	1	0	1	1	0	0	1	1	1	3	5	5	5	0.134874	0	35	1	8	5	4	102000	69300	1	0	1
2020	397	1	0	0	1	1	0	1	7	5	1	5	5	5	0.107024	0	33	1	9	5	4	56500	60000	0	0	0
2022	397	1	0	0	1	1	1	1	4	5	2	3	5	5	0.196813	0	35	1	12	3	4	102000	69300	1	0	0
2020	398	1	0	0	1	0	0	1	3	1	4	5	2	3	0.0343513	0	51	1	8	4	2	33840	82000	0	0	0
2022	398	1	0	0	1	0	0	1	3	4	3	5	5	5	0.0506229	0	53	1	9	3	2	66060	100000	0	0	0
2020	399	1	0	0	0	0	0	1	3	5	5	5	5	5	0.0499452	0	53	0	9	5	2	36660	23600	0	0	1
2022	399	1	0	0	1	1	0	1	4	5	5	5	5	5	0.0993255	0	55	0	9	1	2	19136	10000	1	0	1
2020	400	1	0	0	1	1	0	1	2	3	3	5	5	5	0.0780256	0	35	1	12	3	4	16400	45700	1	0	1
2022	400	1	0	0	1	1	1	1	2	3	3	5	5	5	0.183426	0	37	1	9	3	4	226200	102800	1	0	0
2020	401	1	0	0	1	0	0	1	2	3	2	4	2	3	0.0295942	0	35	1	9	3	4	16400	45700	1	0	1
2022	401	1	0	0	1	1	1	1	1	5	3	5	5	3	0.179601	0	37	1	9	3	4	226200	102800	1	0	1
2020	402	1	0	0	1	0	0	1	1	3	5	5	3	5	0.0373569	0	31	1	9	3	4	34840	60000	0	0	0
2022	402	1	0	0	1	0	0	1	1	3	2	3	4	2	0.0251178	0	33	1	9	3	4	177680	37500	0	0	0
2020	403	1	0	1	1	0	1	1	2	4	3	3	4	2	0.245201	0	19	0	13	2	4	45760	29000	0	0	0
2022	403	1	1	1	1	0	0	1	2	3	3	3	3	3	0.248091	0	21	0	15	5	4	37500	18000	0	0	0
2020	404	1	0	0	0	0	0	1	7	5	4	5	3	5	0.0660685	0	42	1	12	4	4	99200	156160	1	0	0
2022	404	1	0	0	1	0	0	1	2	5	4	5	5	5	0.050232	0	44	1	9	4	6	199300	192000	1	0	0
2020	405	1	0	0	1	0	0	1	2	1	5	5	2	5	0.0351784	0	34	1	9	2	6	68260	55000	1	0	0
2022	405	1	0	0	1	0	0	1	1	5	5	5	5	3	0.0427955	0	36	1	9	5	6	30000	103360	0	0	0
2020	406	1	0	0	1	1	1	1	5	5	4	5	4	5	0.206159	0	31	1	12	3	6	68260	55000	1	0	0
2022	406	1	0	0	1	1	1	1	5	5	3	4	5	4	0.203116	0	33	1	12	1	6	30000	103360	0	0	0
2020	407	1	0	1	1	1	0	1	2	2	4	5	3	5	0.177618	0	28	1	9	2	6	69060	104400	1	0	1
2022	407	1	0	0	1	1	0	1	2	4	4	4	4	4	0.078585	0	30	1	12	2	6	90860	135000	1	0	1
2020	408	1	0	1	1	1	0	1	2	3	4	5	4	4	0.180337	0	31	1	12	4	6	69060	104400	1	0	1
2022	408	1	0	1	1	1	1	1	1	3	3	5	5	5	0.281938	0	33	1	9	3	6	90860	135000	1	0	1
2020	409	1	0	0	1	1	1	1	1	5	4	5	5	5	0.185949	1	31	1	9	3	7	100120	80000	1	0	1
2022	409	1	0	0	1	1	0	1	3	3	3	3	3	4	0.0764717	0	33	1	15	3	7	318492	170000	1	0	0
2020	410	1	0	0	1	0	0	1	1	5	3	5	1	5	0.0350103	0	57	1	8	3	6	42520	147275	1	0	1
2022	410	1	0	0	1	0	0	1	1	5	3	5	3	5	0.0387531	0	59	1	8	3	6	55840	116500	1	0	1
2020	411	1	0	1	1	1	0	1	1	3	4	5	1	3	0.167136	0	32	1	9	4	6	42520	147275	1	0	1
2022	411	1	0	0	1	1	0	1	4	3	4	5	3	5	0.0875394	0	34	1	9	3	6	55840	116500	1	0	1
2020	412	1	0	0	1	1	0	1	3	3	4	5	5	5	0.0857618	0	26	1	7	4	6	42520	147275	1	0	0
2022	412	1	0	0	1	1	1	1	7	5	5	5	5	5	0.221287	0	28	1	6	3	6	55840	116500	1	0	1
2020	413	1	1	1	1	1	0	1	7	3	4	4	4	5	0.320382	1	35	1	16	3	3	189220	160000	0	1	0
2022	413	1	1	1	1	1	1	1	5	5	5	5	5	5	0.425289	0	37	1	16	3	3	116240	130000	0	1	0
2020	414	1	0	1	1	1	0	1	1	3	5	3	5	5	0.179704	0	19	0	9	3	6	13176	65600	1	0	0
2022	414	1	0	1	1	1	0	1	5	5	5	3	1	5	0.200128	0	21	1	9	1	7	13896	70000	0	0	0
2020	415	1	1	0	1	1	1	1	4	3	3	4	4	3	0.298841	0	31	1	15	1	6	10000	55000	1	0	0
2022	415	1	1	0	1	1	0	1	1	1	2	3	4	4	0.170269	0	33	1	15	1	5	75000	80000	1	0	0
2020	416	1	0	1	1	1	1	1	1	3	3	3	3	3	0.272798	0	30	1	15	3	3	186440	100000	0	0	0
2022	416	1	0	1	1	1	0	1	2	1	3	3	3	3	0.167091	1	32	1	15	3	3	223972	100000	0	0	0
2020	417	1	1	0	0	0	0	1	3	5	5	5	4	5	0.159083	0	42	0	9	5	7	121860	132200	1	0	1
2022	417	0	1	0	0	1	0	1	5	5	5	5	5	5	0.207727	1	44	1	7	3	7	119580	43940	1	0	0
2020	418	1	0	0	1	0	0	1	4	2	1	5	3	3	0.0380098	0	26	1	9	2	7	156400	96000	1	0	0
2022	418	1	0	0	1	1	0	1	5	3	3	4	3	5	0.0902113	0	28	1	6	2	7	60000	200000	1	0	1
2020	419	1	0	0	1	1	1	1	4	5	5	3	3	5	0.199717	0	21	1	9	1	6	61000	60000	1	0	0
2022	419	1	0	0	1	1	1	1	3	5	3	5	5	5	0.194774	0	23	1	9	3	6	215096	96200	1	0	0
2020	420	1	1	0	1	1	1	1	6	4	3	5	3	2	0.309491	1	34	1	15	3	3	128580	151300	0	0	0
2022	420	1	1	0	1	0	1	1	2	5	3	5	5	3	0.260294	1	36	1	15	3	3	377140	300002	0	1	1
2020	421	1	0	0	1	1	0	1	4	2	2	5	5	5	0.083937	0	28	1	9	5	2	84400	84300	0	0	1
2022	421	1	0	1	1	1	0	1	4	5	5	5	5	5	0.203358	0	30	1	9	5	2	105500	93000	0	0	1
2020	422	1	1	0	1	1	0	1	6	4	3	5	5	5	0.214031	0	34	1	15	3	4	28160	33500	1	0	1
2022	422	1	1	0	1	1	1	1	4	5	5	5	5	5	0.315736	1	36	1	15	3	4	260700	40550	1	0	1
2020	423	1	0	0	1	0	1	1	7	5	2	5	5	5	0.178803	0	29	1	9	3	4	44200	223000	0	0	0
2022	423	1	0	0	1	1	1	1	7	5	4	5	5	5	0.219072	0	31	1	9	3	6	159800	357300	1	0	0
2020	424	1	0	0	1	1	0	1	4	5	1	5	5	5	0.0904626	0	30	1	9	3	4	52600	55700	1	0	0
2022	424	1	0	0	1	0	0	1	4	5	5	5	5	5	0.0634886	0	32	1	9	3	4	98060	80000	1	0	0
2020	425	1	1	1	1	1	0	1	2	5	5	5	5	5	0.303327	0	29	1	12	3	5	167460	75360	0	0	1
2022	425	1	1	0	1	1	0	1	7	5	2	5	5	5	0.220249	0	31	1	6	2	5	161840	150000	1	0	1
2020	426	1	1	1	1	1	1	1	2	4	3	5	4	5	0.399511	0	27	1	12	3	5	47560	83000	1	0	1
2022	426	1	0	1	1	0	1	1	1	2	3	1	2	3	0.23091	1	29	1	12	3	5	81880	100000	0	0	0
2020	427	1	1	0	0	0	0	1	2	2	3	4	4	4	0.137692	0	33	1	16	4	4	56900	75000	1	0	0
2022	427	1	1	1	1	0	1	1	2	5	3	5	4	4	0.364522	0	35	1	16	4	4	51620	50000	0	0	0
2020	428	1	0	0	1	1	0	1	3	3	3	4	4	3	0.07691	0	32	1	9	2	4	68100	80000	0	0	0
2022	428	1	0	0	1	1	0	1	1	1	3	5	2	3	0.0569317	0	34	1	9	2	4	114760	240000	0	0	0
2020	429	1	0	0	1	1	1	1	1	5	3	5	5	5	0.183733	0	27	1	12	3	6	42300	96900	1	0	0
2022	429	1	0	0	0	1	1	1	1	2	3	5	3	5	0.163226	0	29	1	12	3	6	87800	179800	1	0	0
2020	430	1	0	0	1	0	0	1	2	5	5	5	5	5	0.0524477	0	48	1	9	2	5	114640	51800	1	0	1
2022	430	1	0	1	1	1	0	1	2	5	3	5	3	2	0.177946	0	50	1	9	1	6	50000	44000	1	0	1
2020	431	1	1	1	1	0	0	1	3	5	5	5	5	3	0.268879	0	25	1	12	3	5	114640	51800	1	0	1
2022	431	1	0	0	1	0	0	1	2	5	5	5	5	5	0.0524477	0	27	1	15	3	6	50000	44000	1	0	1
2020	432	1	0	0	1	1	0	1	3	3	3	4	4	3	0.07691	0	20	0	12	2	3	61000	10000	1	0	0
2022	432	1	0	0	1	1	1	1	5	4	4	5	5	5	0.205117	0	22	0	15	3	7	48200	81500	1	0	1
2020	433	1	0	1	1	1	0	1	5	4	4	4	4	4	0.199179	0	39	1	6	5	6	4580	70800	0	0	0
2022	433	1	0	0	1	1	1	1	5	5	5	5	5	5	0.210246	0	41	1	6	5	6	46800	72400	1	0	1
2020	434	1	0	0	1	0	0	1	2	3	5	5	5	5	0.0466201	0	33	1	9	3	6	42300	70000	1	0	0
2022	434	1	0	0	1	1	0	1	2	5	4	5	5	5	0.0860689	0	35	1	9	4	4	141100	50120	1	0	1
2020	435	1	0	0	1	0	1	1	4	5	5	5	5	5	0.168889	0	35	1	9	4	6	42300	70000	1	0	1
2022	435	1	0	0	1	0	0	1	3	2	3	4	4	5	0.0422912	0	37	1	6	4	4	141100	50120	1	0	1
2020	436	1	0	0	1	0	0	1	4	4	5	5	5	4	0.0585089	0	44	1	6	4	2	29500	37715	1	0	0
2022	436	1	0	0	1	0	0	1	3	3	4	5	2	5	0.0443107	0	54	1	6	4	2	18260	40000	1	0	1
2020	437	1	0	0	0	0	0	1	1	3	2	5	3	2	0.0164892	0	49	1	12	2	8	36780	80000	1	0	1
2022	437	1	0	0	1	0	0	1	2	3	2	5	5	2	0.0337753	0	51	1	12	3	7	32404	97000	1	0	1
2020	438	1	1	1	1	1	0	1	3	4	3	4	3	3	0.292995	0	23	0	15	1	8	36780	80000	1	0	0
2022	438	1	1	0	1	0	1	1	5	5	5	5	5	5	0.285419	0	25	0	15	3	7	32404	97000	1	0	0
2020	439	1	0	0	1	0	0	1	1	5	5	5	5	5	0.0469273	0	51	1	9	5	2	43736	40000	1	0	0
2022	439	1	0	0	1	0	0	1	5	5	5	5	5	5	0.069009	0	53	1	9	5	2	32100	20000	1	0	1
2020	440	1	0	0	1	0	0	1	1	5	5	5	5	5	0.0469273	0	57	1	0	5	2	43736	40000	1	0	0
2022	440	1	0	0	1	0	0	1	1	5	5	5	5	5	0.0469273	0	59	1	0	5	2	32100	20000	1	0	1
2020	441	1	0	0	0	0	0	1	1	5	3	5	5	4	0.032407	0	34	1	9	1	3	49720	30000	0	0	0
2022	441	1	0	0	1	1	1	1	1	3	3	5	5	5	0.177906	0	36	1	9	3	3	29140	40000	1	0	0
2020	442	1	0	0	1	1	1	1	5	3	3	4	4	4	0.195417	0	43	1	12	3	5	33360	8340	1	0	0
2022	442	1	0	0	1	1	1	1	4	4	4	5	4	4	0.195659	0	45	1	12	3	5	54500	30000	1	0	0
2020	443	1	0	0	1	0	0	1	7	2	3	5	3	3	0.0590025	0	43	1	8	2	5	67548	33950	1	0	1
2022	443	1	0	0	1	0	0	1	5	3	4	5	2	5	0.0553516	0	45	1	8	2	5	86100	85900	1	0	0
2020	444	1	1	1	1	1	0	1	2	5	5	5	5	5	0.303327	0	25	0	16	3	3	86544	141500	1	0	1
2022	444	1	1	0	1	1	1	1	2	5	5	5	5	5	0.304695	1	27	0	16	3	3	116060	150000	1	0	0
2020	445	1	0	0	0	0	0	1	4	5	5	5	5	5	0.0554656	1	40	1	9	4	4	104900	40000	1	0	0
2022	445	1	0	0	1	0	0	1	5	3	3	5	5	5	0.05875	1	42	1	9	3	4	45660	61000	1	0	0
2020	446	1	0	0	1	1	0	1	5	5	5	5	5	5	0.104846	0	22	0	12	1	4	32120	102400	1	0	0
2022	446	1	0	1	1	1	0	1	7	5	5	5	5	5	0.219919	0	24	0	12	3	4	28232	117600	1	0	0
2020	447	1	0	0	1	0	0	1	4	5	3	3	4	3	0.0517883	0	54	1	9	3	3	137095	115500	0	1	0
2022	447	1	0	0	1	0	0	1	1	5	4	5	5	4	0.0426456	0	56	1	9	4	3	40000	104200	0	0	0
2020	448	1	0	0	1	0	0	1	1	3	3	1	4	4	0.0301997	0	30	0	12	2	3	137095	115500	0	1	0
2022	448	1	0	0	1	0	0	1	1	2	2	2	2	1	0.0157626	0	32	0	6	2	3	40000	104200	0	0	1
2020	449	1	0	0	1	0	0	1	4	1	5	5	5	5	0.0518334	0	39	1	9	4	6	62036	86898	1	0	1
2022	449	1	0	0	1	0	0	1	1	5	5	5	5	3	0.0427955	0	41	1	9	3	6	84700	74000	1	0	1
2020	450	1	0	0	1	1	0	1	1	3	3	4	4	4	0.0679351	0	57	1	11	3	2	32460	80000	1	0	0
2022	450	1	0	0	1	1	0	1	1	5	4	5	4	3	0.0745453	0	59	1	12	3	2	40880	79250	1	0	1
2020	451	1	0	0	1	1	0	1	2	5	5	5	5	5	0.0882846	0	34	0	12	1	1	60008	46010	0	1	1
2022	451	1	0	1	1	1	0	1	1	2	4	5	4	3	0.169837	0	36	0	12	1	1	30610	35000	0	0	0
2020	452	1	0	0	1	1	0	1	4	3	5	5	5	5	0.0934979	0	48	1	9	3	5	28540	50000	1	0	1
2022	452	1	0	0	1	1	0	1	4	5	3	5	5	4	0.0928281	0	50	1	9	3	5	34130	170000	1	0	1
2020	453	1	0	0	1	1	0	1	2	5	3	5	5	5	0.0838532	0	50	1	9	5	4	70002	60300	0	0	0
2022	453	1	0	0	1	1	0	1	2	5	5	5	5	5	0.0882846	0	52	1	9	5	4	24480	72200	0	0	0
2020	454	1	0	0	1	0	0	1	4	2	2	3	4	3	0.0408313	0	48	1	9	3	4	70002	60300	0	0	0
2022	454	1	0	0	1	1	1	1	4	3	3	3	3	2	0.183261	0	50	1	9	2	4	24480	72200	0	0	1
2020	455	1	0	0	1	1	0	1	3	4	4	4	4	3	0.0820395	0	53	1	9	3	6	68146	124690	1	0	1
2022	455	1	0	0	1	1	0	1	2	3	3	4	3	4	0.0715841	0	55	1	9	3	6	74700	147660	1	0	1
2020	456	1	0	0	1	0	1	1	5	3	3	5	3	3	0.156276	0	53	1	8	5	6	68146	124690	1	0	1
2022	456	1	0	0	1	0	0	1	1	5	5	5	5	5	0.0469273	0	55	1	8	4	6	74700	147660	1	0	1
2020	457	1	0	0	1	0	0	1	3	3	3	5	5	5	0.0477091	0	32	1	9	3	6	68146	124690	1	0	0
2022	457	1	0	1	1	0	0	1	4	5	1	5	5	5	0.158659	0	34	1	9	3	6	74700	147660	1	0	1
2020	458	1	0	0	1	1	0	1	4	3	4	5	4	4	0.0873449	1	34	1	15	3	6	68146	124690	1	0	1
2022	458	1	0	0	1	1	0	1	3	4	4	3	4	4	0.0834726	0	36	1	15	3	6	74700	147660	1	0	1
2020	459	1	1	1	1	0	1	1	2	3	2	5	3	5	0.356673	0	20	0	9	2	4	59180	89400	1	0	0
2022	459	1	1	0	1	1	1	1	1	5	2	3	4	3	0.285258	0	22	0	9	2	4	48080	92400	1	0	0
2020	460	1	0	0	1	1	0	1	1	3	2	5	3	2	0.060349	0	43	0	9	3	4	59180	89400	1	0	0
2022	460	1	0	1	1	1	0	1	2	5	3	3	3	3	0.178746	0	45	0	9	3	4	48080	92400	1	0	0
2020	461	1	0	0	1	0	0	1	1	1	3	3	1	1	0.0138259	0	50	1	9	3	3	86820	76540	0	0	1
2022	461	1	0	1	1	0	0	1	1	2	1	5	1	1	0.117607	0	52	1	9	3	3	22700	64800	0	0	1
2020	462	1	0	0	1	1	0	1	5	3	2	5	3	3	0.0844966	0	44	1	9	3	5	42296	107100	1	0	1
2022	462	1	0	0	1	1	0	1	5	5	3	5	3	5	0.0966717	1	46	1	6	3	4	41556	89780	1	0	1
2020	463	1	0	0	1	0	0	1	5	4	4	4	4	4	0.0593094	1	21	0	15	3	5	42296	107100	1	0	0
2022	463	1	0	0	1	1	0	1	5	3	3	4	3	3	0.0860795	0	23	0	15	3	1	108000	96000	0	0	0
2020	464	1	0	0	0	1	0	1	4	1	5	5	1	1	0.0638983	1	45	1	9	3	3	97700	98900	1	0	1
2022	464	1	0	0	1	1	0	1	2	1	1	5	5	1	0.059503	1	47	1	9	5	2	98900	100000	1	0	0
2020	465	1	0	0	0	1	0	1	1	4	5	5	4	5	0.0699561	0	23	0	15	3	3	97700	98900	1	0	0
2022	465	1	0	0	1	1	0	1	1	5	4	5	4	4	0.0766112	1	25	0	15	3	1	62960	100000	0	0	0
2020	466	1	0	0	1	0	0	1	2	5	5	5	5	5	0.0524477	0	35	1	9	3	5	63208	80908	1	0	0
2022	466	1	1	0	1	1	1	1	1	1	3	3	4	1	0.271687	0	37	1	9	3	5	60000	139140	1	0	1
2020	467	1	1	0	1	0	0	1	4	5	4	5	3	5	0.16854	0	34	1	9	3	5	63208	80908	1	0	0
2022	467	1	0	0	1	0	0	1	1	3	3	3	3	3	0.0275281	0	36	1	9	3	5	60000	139140	1	0	0
2020	468	1	0	0	1	0	0	1	1	3	3	5	3	5	0.0329255	0	48	1	6	3	3	26140	58510	1	0	1
2022	468	1	0	0	1	1	0	1	6	4	4	5	5	5	0.105237	0	50	1	6	3	3	33920	100000	1	0	1
2020	469	1	0	0	0	0	0	1	2	3	4	5	1	4	0.0268301	0	47	1	6	3	3	26140	58510	1	0	0
2022	469	1	0	0	0	0	0	1	2	2	3	5	3	3	0.0233774	0	49	1	6	3	3	33920	100000	1	0	1
2020	470	1	0	0	1	1	0	1	2	3	4	5	4	5	0.0783699	0	53	1	12	3	2	43092	50000	1	0	1
2022	470	1	0	0	1	1	0	1	2	4	4	5	4	3	0.0771519	0	55	1	12	4	2	26500	66000	0	0	1
2020	471	1	1	1	1	1	0	1	5	5	5	5	3	5	0.316146	1	37	1	16	4	6	70325	130000	1	0	1
2022	471	1	0	1	1	1	0	1	5	4	3	5	3	3	0.193659	1	39	1	16	3	6	30000	47700	1	0	1
2020	472	1	0	0	1	0	0	1	4	4	3	3	3	4	0.0490691	0	38	1	15	3	6	70325	130000	1	0	0
2022	472	1	0	0	0	0	0	1	1	2	3	4	3	2	0.0151583	0	40	1	15	3	6	30000	47700	1	0	0
2020	473	1	0	1	1	1	0	1	5	3	5	5	5	5	0.203051	0	32	1	15	3	4	70856	61600	0	0	0
2022	473	1	0	0	1	1	0	1	5	4	5	3	3	3	0.0927919	0	34	1	15	2	4	90740	45000	0	0	0
2020	474	1	0	0	1	1	0	1	2	3	2	3	4	3	0.0685411	0	35	1	9	3	9	107840	98600	1	0	1
2022	474	1	0	0	1	1	0	1	1	4	2	5	3	5	0.0694605	0	37	1	9	2	8	256880	157700	1	0	1
2020	475	1	0	0	1	1	0	1	4	3	5	5	3	5	0.0897551	0	32	1	9	1	9	107840	98600	1	0	1
2022	475	1	0	0	1	1	0	1	3	5	3	5	1	5	0.0818881	0	34	1	9	1	8	256880	157700	1	0	1
2020	476	1	0	0	1	1	0	1	3	5	5	5	4	5	0.0919337	0	35	1	12	1	4	96860	56000	0	0	1
2022	476	1	0	0	1	1	0	1	5	4	3	5	4	4	0.0935634	0	37	1	12	2	3	79585	72000	0	0	1
2020	477	1	0	0	1	0	0	1	6	1	2	3	3	4	0.0491529	0	46	1	8	3	4	83000	65000	1	0	1
2022	477	1	0	0	1	1	0	1	1	1	3	3	4	4	0.0614747	0	48	1	8	3	4	84120	109210	1	0	1
2020	478	1	0	0	1	0	0	1	1	1	5	1	1	1	0.0169917	1	47	1	6	4	4	83000	65000	1	0	1
2022	478	1	0	0	1	1	0	1	1	1	1	5	2	2	0.0504343	1	49	1	6	3	4	84120	109210	1	0	1
2020	479	1	0	0	0	0	0	1	1	2	2	4	3	2	0.0129426	0	24	1	9	3	3	49740	106000	0	0	0
2022	479	1	0	0	1	1	0	1	1	1	3	4	3	3	0.0581702	0	26	1	9	3	4	77000	100000	0	0	1
2020	480	1	0	0	1	0	0	1	2	5	5	5	5	5	0.0524477	0	53	1	6	3	2	38872	52114	1	0	0
2022	480	1	0	0	1	1	0	1	2	4	3	5	5	2	0.0747417	0	55	1	6	3	2	25130	50400	0	0	0
2020	481	1	0	1	1	0	0	1	4	4	3	3	4	3	0.152907	1	37	0	12	3	3	63760	86120	0	0	1
2022	481	1	1	0	1	1	0	1	4	2	2	3	1	5	0.186196	1	39	0	12	4	3	79220	106400	0	0	1
2020	482	1	0	0	1	1	1	1	2	4	3	4	4	4	0.18177	0	39	1	0	2	3	47448	140000	1	0	0
2022	482	1	1	0	1	1	0	1	3	4	3	3	4	4	0.192267	1	41	1	0	3	4	80900	53600	0	0	1
2020	483	1	0	0	1	0	0	1	2	5	3	5	5	5	0.0480163	1	51	1	8	5	3	29760	101500	1	0	1
2022	483	1	0	0	1	1	0	1	1	5	5	5	5	5	0.0827642	1	53	1	6	3	3	27850	144000	1	0	1
2020	484	1	1	1	1	1	0	1	2	3	4	3	2	3	0.284272	1	25	0	16	2	3	29760	101500	1	0	0
2022	484	1	0	1	1	0	0	1	7	5	3	5	4	5	0.17778	0	27	0	16	3	3	27850	144000	1	0	0
2020	485	1	1	1	1	1	0	1	6	5	5	5	5	5	0.325409	0	18	0	9	1	4	66080	276200	0	0	0
2022	485	1	1	1	1	1	0	1	7	5	5	5	5	5	0.330929	0	20	1	6	5	2	683115	230000	0	0	0
2020	486	1	1	1	1	1	0	1	5	5	3	5	5	5	0.315457	0	22	0	9	3	4	65800	66000	0	0	1
2022	486	1	0	0	1	1	0	1	3	4	4	4	5	5	0.0880427	0	24	0	9	3	4	80700	82700	1	0	1
2020	487	1	0	0	1	1	0	1	4	2	4	5	5	5	0.0883684	0	34	0	9	2	3	29540	84600	1	0	1
2022	487	1	0	0	1	0	0	1	4	5	5	5	5	5	0.0634886	0	36	1	9	5	5	20000	100000	1	0	1
2020	488	1	0	0	0	0	0	1	1	1	1	4	1	1	0.0020044	0	60	1	9	1	7	244155	70000	0	0	0
2022	488	1	0	0	1	0	0	1	2	4	4	4	2	1	0.0328076	0	62	1	9	2	6	137080	140300	0	0	1
2020	489	1	0	0	0	1	0	1	2	5	3	5	5	5	0.0758303	0	34	1	16	1	7	244155	70000	0	0	0
2022	489	1	0	0	1	1	1	1	2	5	5	5	5	5	0.193685	0	36	1	16	2	6	137080	140300	0	0	1
2020	490	1	1	0	0	1	1	1	2	5	5	5	5	5	0.296672	0	34	1	15	3	7	244155	70000	0	0	0
2022	490	1	1	0	1	1	1	1	1	5	5	5	5	5	0.299174	1	36	1	15	4	6	137080	140300	0	0	0
2020	491	1	1	0	1	1	1	1	2	5	3	5	5	5	0.300263	0	43	1	15	3	3	60300	100000	0	1	1
2022	491	1	1	0	1	1	1	1	3	4	3	3	3	5	0.297862	1	45	1	15	3	3	75340	100500	0	0	1
2020	492	1	1	0	1	1	1	1	5	5	3	4	4	4	0.312254	0	18	0	12	3	3	60300	100000	0	1	0
2022	492	1	1	1	1	1	1	1	5	5	4	3	4	4	0.41787	0	20	0	14	4	3	75340	100500	0	0	0
2020	493	1	0	0	1	1	0	1	2	3	3	4	3	3	0.0695182	1	45	1	12	2	3	60100	60000	0	0	0
2022	493	1	0	0	1	1	0	1	2	2	3	4	2	3	0.0647331	1	47	1	12	3	3	50284	116400	0	0	0
2020	494	1	0	1	1	1	0	1	5	5	3	5	5	5	0.204447	0	43	1	9	3	3	88340	100000	1	0	1
2022	494	1	0	1	1	1	0	1	4	5	5	5	5	5	0.203358	0	45	1	9	3	4	82260	150000	1	0	0
2020	495	1	0	1	1	1	0	1	4	5	5	5	4	3	0.197355	0	42	1	12	3	6	134660	150000	1	0	1
2022	495	1	0	1	1	1	0	1	5	3	5	5	5	4	0.200985	0	44	1	12	3	6	120300	150000	1	0	0
2020	496	1	0	0	1	0	0	1	4	2	5	5	5	5	0.0547472	0	39	1	6	3	4	30200	35000	1	0	1
2022	496	1	0	0	0	0	0	1	5	5	5	5	5	1	0.0527225	0	41	1	6	2	4	45260	50000	1	0	1
2020	497	1	0	0	1	1	0	1	3	3	4	3	3	4	0.0786875	0	34	1	12	2	4	30200	35000	1	0	0
2022	497	1	0	0	1	0	0	1	1	3	3	4	3	2	0.026095	0	36	1	9	2	4	45260	50000	1	0	0
2020	498	1	0	0	1	0	0	1	1	1	3	5	3	5	0.0270979	0	49	1	9	2	5	112292	100000	1	0	1
2022	498	1	0	0	1	0	0	1	1	3	5	5	5	5	0.0410997	0	51	1	9	2	5	28320	80000	1	0	1
2020	499	1	0	0	1	0	1	1	4	5	5	5	3	4	0.16308	0	54	0	9	2	3	31780	75600	1	0	1
2022	499	1	0	0	1	0	0	1	4	3	3	3	3	4	0.0461553	0	56	0	9	3	3	96100	110000	1	0	1
2020	500	1	0	0	1	1	0	1	4	3	5	5	5	5	0.0934979	0	32	1	9	3	3	31780	75600	1	0	1
2022	500	1	0	0	1	1	0	1	5	1	5	5	5	3	0.089059	0	34	1	9	4	3	96100	110000	1	0	1
2020	501	1	0	0	1	1	0	1	2	3	3	2	2	4	0.0684471	0	33	1	9	3	3	31780	75600	1	0	0
2022	501	1	0	0	1	1	1	1	4	5	5	5	4	5	0.202854	0	35	1	9	1	3	96100	110000	1	0	0
2020	502	1	0	1	1	0	0	1	1	3	2	5	1	1	0.122736	0	54	1	6	1	2	47495	20000	1	0	0
2022	502	1	0	1	1	0	0	1	1	1	5	5	2	2	0.127493	0	56	1	6	2	2	74412	30000	1	0	0
2020	503	1	1	0	1	0	1	1	1	2	4	3	4	5	0.249243	0	41	1	12	5	4	228000	84000	0	0	0
2022	503	1	0	0	1	0	0	1	5	4	4	5	4	5	0.0620081	1	43	1	9	3	6	355630	180000	1	0	0
2020	504	1	1	0	1	0	1	1	7	3	3	4	4	5	0.283697	0	38	1	12	3	4	228000	84000	0	0	1
2022	504	1	1	0	1	1	1	1	7	5	3	5	5	5	0.327865	0	40	1	12	3	6	355630	180000	1	0	1
2020	505	1	0	0	0	0	0	1	7	5	5	5	5	5	0.072027	0	44	1	6	5	2	63090	100000	1	0	0
2022	505	1	0	0	1	1	0	1	5	5	5	5	5	5	0.104846	0	46	1	6	5	2	202310	200000	1	0	1
2020	506	1	0	0	1	0	0	1	1	4	4	5	5	5	0.0417978	0	57	1	9	4	1	44380	282000	1	0	1
2022	506	1	0	0	1	0	0	1	1	5	5	5	5	5	0.0469273	0	59	1	9	3	2	44450	100000	1	0	1
2020	507	1	0	0	1	0	1	1	1	4	4	4	4	4	0.142628	0	49	1	9	3	4	42200	62164	1	0	0
2022	507	1	0	0	0	1	0	1	1	3	4	4	4	3	0.060062	0	51	1	9	3	3	75760	100000	1	0	0
2020	508	1	0	1	1	1	0	1	1	3	5	2	3	5	0.175328	0	33	1	9	4	5	78900	50000	1	0	0
2022	508	1	0	0	1	1	0	1	2	3	5	5	3	4	0.0766484	0	35	1	9	4	5	21900	155450	1	0	1
2020	509	1	0	0	1	0	0	1	1	5	3	5	3	2	0.0325554	0	44	0	9	3	1	35300	30600	0	0	1
2022	509	1	0	0	1	0	0	1	1	5	4	5	4	4	0.0407743	0	46	0	9	4	1	25800	20000	0	0	0
2020	510	1	0	1	1	1	0	1	7	5	5	5	5	5	0.219919	1	37	1	12	3	2	75844	5000	0	0	1
2022	510	1	0	0	1	1	0	1	4	5	5	5	5	5	0.0993255	1	39	1	9	2	2	80600	30000	0	0	1
2020	511	1	0	0	1	0	1	1	2	3	1	5	4	3	0.137155	0	41	1	12	2	1	81680	100000	0	0	0
2022	511	1	0	0	1	0	0	1	3	4	2	5	5	5	0.0484072	1	43	1	12	3	1	133260	90000	0	0	0
2020	512	1	0	0	1	0	0	1	1	3	5	5	5	5	0.0410997	0	54	1	9	4	5	54300	96800	1	0	1
2022	512	1	0	0	1	1	0	1	1	5	5	5	5	5	0.0827642	0	56	1	9	5	3	21160	10000	1	0	1
2020	513	1	0	1	1	0	1	1	2	2	5	5	5	3	0.249008	0	33	1	9	3	5	54300	96800	1	0	1
2022	513	1	1	1	1	1	0	1	2	3	3	5	4	5	0.291197	1	35	1	9	3	2	82800	170000	0	0	1
2020	514	1	0	0	1	1	0	1	7	2	5	5	5	5	0.107145	0	32	1	9	2	5	54300	96800	1	0	1
2022	514	1	0	1	1	1	0	1	2	5	5	5	5	5	0.192317	1	34	1	9	2	2	82800	170000	0	0	0
2020	515	1	0	0	1	1	0	1	3	5	5	5	5	5	0.093805	1	37	1	9	4	3	83400	80000	0	0	0
2022	515	1	0	0	1	0	1	1	2	5	4	5	5	4	0.153566	0	39	1	9	3	3	97600	55000	0	0	0
2020	516	1	0	0	0	0	0	1	2	3	2	3	2	2	0.0188726	0	55	1	9	3	2	12980	37400	1	0	0
2022	516	1	0	0	1	0	0	1	1	4	3	5	4	5	0.0377107	0	57	1	9	2	2	21830	25050	1	0	0
2020	517	1	1	0	1	1	0	1	2	5	3	5	4	5	0.192992	1	29	1	15	3	3	118060	360000	1	0	0
2022	517	1	1	1	1	1	0	1	1	5	3	5	5	5	0.293375	0	31	1	15	1	3	73990	50000	1	0	0
2020	518	1	0	0	1	0	0	1	7	3	1	5	3	1	0.0533531	0	44	1	9	1	3	23340	22700	1	0	1
2022	518	1	0	0	1	0	0	1	6	2	2	3	3	1	0.0458689	0	46	1	9	2	3	32172	44616	0	0	1
2020	519	1	0	0	1	0	1	1	2	2	2	3	3	4	0.135385	0	33	1	12	4	5	35540	77400	1	0	1
2022	519	1	0	1	1	0	0	1	3	2	2	4	2	2	0.134168	0	35	1	12	3	5	37480	70000	0	0	0
2020	520	1	0	0	1	1	0	1	3	1	5	5	5	1	0.0738863	0	30	1	9	3	5	35540	77400	1	0	0
2022	520	1	0	0	1	0	0	1	7	5	5	5	5	4	0.077984	0	32	1	9	3	5	37480	70000	0	0	0
2020	521	1	0	0	1	1	0	1	1	1	2	5	4	5	0.0625905	0	46	1	9	3	2	44592	80000	1	0	1
2022	521	1	0	0	1	1	0	1	1	4	4	5	5	5	0.0776347	1	48	1	9	4	2	67932	400000	1	0	1
2020	522	1	0	0	0	1	0	1	1	1	3	5	1	2	0.0449715	0	49	1	6	1	2	20760	25000	1	0	1
2022	522	1	0	0	1	1	0	1	1	3	3	5	3	3	0.0646306	0	51	1	6	2	2	12140	20100	0	0	1
2020	523	1	0	0	1	0	0	1	1	1	4	5	5	4	0.0309905	0	51	1	7	5	2	79900	130000	1	0	0
2022	523	1	0	0	1	1	0	1	2	5	5	5	5	2	0.0820869	0	53	1	7	4	2	28568	80000	1	0	0
2020	524	1	0	0	1	0	0	1	1	5	5	5	5	5	0.0469273	0	51	1	6	3	3	34332	54500	0	0	1
2022	524	1	0	0	1	1	0	1	1	5	5	5	5	5	0.0827642	1	53	1	7	3	3	43072	60000	1	0	1
2020	525	1	0	0	1	0	0	1	3	4	3	4	3	4	0.0441814	0	39	1	9	2	5	26300	50000	1	0	0
2022	525	1	0	0	0	0	0	1	1	3	1	3	3	3	0.0150737	0	41	1	9	3	5	44436	20000	0	0	0
2020	526	1	0	0	1	1	0	1	2	4	3	5	5	3	0.0768076	0	39	1	9	4	5	26300	50000	1	0	0
2022	526	1	0	0	1	1	0	1	2	3	4	5	5	3	0.0761095	0	41	1	12	1	5	44436	20000	0	0	1
2020	527	1	1	0	1	1	0	1	1	4	2	3	4	1	0.172812	1	28	0	16	3	4	18200	67616	1	0	0
2022	527	1	0	0	1	0	0	1	3	4	2	3	2	1	0.0332638	1	30	0	16	3	3	66752	91000	0	0	0
2020	528	1	0	0	1	0	0	1	1	2	2	5	1	1	0.0157896	0	42	1	6	1	6	74000	30000	1	0	0
2022	528	1	0	0	1	1	0	1	1	1	3	5	1	3	0.0550603	0	44	1	6	1	6	184120	50000	1	0	0
2020	529	1	0	0	1	0	0	1	4	1	1	5	5	5	0.0429706	0	44	1	7	1	6	74000	30000	1	0	0
2022	529	1	0	0	1	1	0	1	2	1	1	5	1	5	0.0602811	0	46	1	6	3	6	184120	50000	1	0	1
2020	530	1	0	1	1	1	0	1	2	4	4	4	4	4	0.182618	0	19	0	15	1	6	74000	30000	1	0	0
2022	530	1	0	1	1	1	1	1	3	3	4	5	3	4	0.289386	0	21	0	12	4	6	184120	50000	1	0	0
2020	531	0	1	0	1	0	0	1	1	3	5	5	5	2	0.145806	1	57	1	10	5	3	37800	104000	1	0	1
2022	531	1	0	0	1	1	0	1	1	1	3	5	3	2	0.0567371	0	59	1	10	3	2	16340	63500	1	0	1
2020	532	1	1	0	1	0	1	1	3	5	5	5	5	3	0.270246	0	57	1	15	3	3	37800	104000	1	0	0
2022	532	1	1	0	1	1	1	1	1	5	5	5	5	5	0.299174	0	59	1	15	4	2	16340	63500	1	0	0
2020	533	1	0	0	1	0	0	1	2	2	2	4	4	1	0.0262914	0	42	1	9	1	4	25840	22800	1	0	1
2022	533	1	0	0	1	0	0	1	1	2	3	5	3	3	0.0258799	0	44	1	9	2	4	119300	50000	1	0	1
2020	534	1	0	0	0	0	0	1	1	3	3	5	5	5	0.0286454	0	54	1	9	3	2	26200	30000	0	0	0
2022	534	1	0	0	1	0	0	1	1	5	3	3	3	3	0.0333556	0	56	1	9	3	2	32020	63500	1	0	0
2020	535	1	0	0	1	0	0	1	2	3	3	5	3	3	0.0343141	0	54	1	6	2	2	26200	30000	0	0	1
2022	535	1	0	0	1	0	0	1	5	5	5	5	5	1	0.0607454	0	56	1	6	5	2	32020	63500	1	0	1
2020	536	1	1	0	1	1	0	1	3	3	3	3	4	3	0.187287	0	22	0	15	3	3	58000	53800	1	0	0
2022	536	1	1	0	1	1	0	1	3	5	5	5	5	4	0.202749	1	24	0	16	3	1	51600	150000	0	0	0
2020	537	1	0	0	1	1	0	1	3	3	3	5	5	5	0.083546	0	25	1	9	5	6	64700	30000	1	0	0
2022	537	1	0	0	1	1	0	1	3	5	5	5	5	3	0.0896732	0	27	1	9	5	5	70660	70000	1	0	1
2020	538	1	0	0	1	0	0	1	1	3	3	4	3	4	0.0302268	0	48	1	8	3	4	23970	30400	1	0	0
2022	538	1	0	0	1	0	0	1	1	3	5	5	3	3	0.0332251	0	50	1	8	3	3	13620	20000	1	0	0
2020	539	1	0	0	0	0	0	1	6	5	4	5	5	5	0.0642908	0	49	1	9	4	4	23970	30400	1	0	1
2022	539	1	0	0	1	0	0	1	5	5	5	5	5	5	0.069009	0	51	1	9	4	3	13620	20000	1	0	1
2020	540	1	0	0	1	0	0	1	1	5	3	5	5	5	0.0424958	0	33	1	9	3	5	15000	700	1	0	1
2022	540	1	0	0	1	1	0	1	4	2	3	5	5	5	0.0861527	0	35	1	9	3	5	55390	35000	1	0	1
2020	541	1	0	0	1	0	0	1	1	1	1	5	1	1	0.0106601	0	54	1	6	3	5	96100	53000	1	0	0
2022	541	1	0	0	1	0	0	1	1	5	5	5	5	1	0.0386637	0	56	1	6	5	6	62200	30000	1	0	0
2020	542	1	0	0	1	1	0	1	1	5	5	5	5	5	0.0827642	0	58	1	9	1	5	96100	53000	1	0	1
2022	542	1	0	1	1	1	1	1	5	5	5	5	5	5	0.314279	0	60	1	9	1	6	62200	30000	1	0	1
2020	543	1	0	0	1	1	0	1	1	2	4	5	2	5	0.066193	0	30	1	6	3	5	96100	53000	1	0	0
2022	543	1	0	0	1	0	0	1	1	5	4	5	5	5	0.0447116	0	32	1	6	3	6	62200	30000	1	0	0
2020	544	1	0	0	1	1	0	1	5	4	5	5	4	5	0.100061	0	26	1	9	3	5	96100	53000	1	0	0
2022	544	1	0	0	1	1	0	1	5	4	4	5	4	5	0.097845	0	28	1	6	3	6	62200	30000	1	0	0
2020	545	1	0	0	1	0	0	1	3	1	2	3	3	2	0.0284598	0	41	1	9	2	5	80900	69750	1	0	0
2022	545	1	0	0	1	1	0	1	2	5	5	5	5	3	0.0841528	0	43	1	9	3	5	74500	89080	1	0	1
2020	546	1	0	0	0	0	0	1	3	4	2	4	3	3	0.0318769	0	47	1	9	3	4	33390	374400	1	0	1
2022	546	1	0	0	1	1	0	1	5	3	3	4	4	4	0.0900168	0	49	1	9	3	4	49980	52070	1	0	1
2020	547	1	0	0	1	0	0	1	2	3	3	5	4	4	0.0382514	0	49	1	9	3	4	9800	24000	0	0	1
2022	547	1	0	0	1	0	0	1	1	5	5	4	4	4	0.0423572	0	51	1	9	3	3	37900	67100	1	0	1
2020	548	1	0	0	1	1	0	1	2	5	3	5	3	4	0.0780445	0	17	0	9	3	4	9800	24000	0	0	0
2022	548	1	0	0	1	1	0	1	2	5	3	5	3	4	0.0780445	0	19	0	9	4	3	37900	67100	1	0	0
2020	549	1	0	0	1	0	0	1	1	1	5	5	1	1	0.019523	0	56	1	0	3	2	11760	9500	0	0	0
2022	549	1	0	0	1	0	0	1	1	1	5	5	1	1	0.019523	0	58	1	0	1	2	21440	13100	1	0	0
2020	550	1	0	1	1	1	0	1	3	1	5	5	5	3	0.182051	0	41	1	9	2	5	30420	62000	1	0	1
2022	550	1	0	1	1	0	0	1	2	3	3	3	1	3	0.133338	0	43	1	9	3	7	37220	50000	1	0	1
2020	551	1	0	0	0	0	0	1	5	5	1	5	5	1	0.0438596	0	42	1	9	5	5	30420	62000	1	0	1
2022	551	1	0	0	1	0	0	1	5	5	3	5	3	4	0.0587689	0	44	1	6	3	7	37220	50000	1	0	1
2020	552	1	0	1	1	1	0	1	6	3	3	4	4	5	0.201636	0	37	1	9	3	4	66460	100000	1	0	1
2022	552	1	0	0	1	1	0	1	3	3	3	4	4	5	0.0810419	0	39	1	9	3	4	116760	100000	1	0	1
2020	553	1	0	0	1	1	0	1	2	2	5	5	3	5	0.0758005	0	32	1	6	3	4	66460	100000	1	0	1
2022	553	1	0	0	1	1	0	1	2	2	3	5	3	5	0.0713691	0	34	1	6	3	4	116760	100000	1	0	1
2020	554	1	0	0	1	0	1	1	2	4	3	4	5	3	0.145738	0	49	1	9	3	2	55296	80000	1	0	1
2022	554	1	0	0	1	1	1	1	3	3	4	5	3	3	0.183288	0	51	1	9	3	2	39996	13000	1	0	1
2020	555	1	0	0	1	0	1	1	6	2	3	3	3	2	0.155551	0	48	1	9	3	2	55296	80000	1	0	1
2022	555	1	0	0	1	1	0	1	2	2	2	3	2	2	0.0598186	0	50	1	9	3	2	39996	13000	1	0	1
2020	556	1	0	1	1	0	1	1	4	5	4	5	5	5	0.270706	0	49	1	9	3	7	56148	52000	1	0	1
2022	556	1	0	0	1	1	0	1	4	5	5	5	5	5	0.0993255	0	51	1	9	3	4	44402	70000	1	0	1
2020	557	1	0	1	1	1	0	1	7	5	5	5	5	5	0.219919	0	26	1	9	4	7	56148	52000	1	0	1
2022	557	1	0	0	1	0	0	1	5	4	4	4	4	4	0.0593094	0	28	1	9	3	3	84948	96000	1	0	1
2020	558	1	0	1	1	0	0	1	4	3	3	4	3	3	0.148755	0	26	1	9	4	7	56148	52000	1	0	0
2022	558	1	0	0	1	0	0	1	4	3	3	4	3	4	0.0467881	0	28	1	9	3	3	84948	96000	1	0	1
2020	559	1	0	0	1	0	0	1	3	4	4	5	5	5	0.0528386	0	46	1	6	1	5	49420	20000	1	0	1
2022	559	1	0	0	1	0	0	1	2	5	5	5	5	5	0.0524477	0	48	1	6	1	5	87256	60000	1	0	1
2020	560	1	0	0	0	1	0	1	6	5	3	5	3	3	0.0900374	0	46	1	6	3	5	49420	20000	1	0	1
2022	560	1	0	0	1	0	0	1	2	3	4	5	5	5	0.0444044	0	48	1	6	3	5	87256	60000	1	0	1
2020	561	1	0	0	1	0	0	1	2	4	3	4	3	4	0.038661	0	30	1	8	3	5	107300	60300	1	0	1
2022	561	1	0	1	0	0	0	1	2	4	3	5	4	5	0.139241	0	32	1	0	3	5	70646	150000	1	0	1
2020	562	1	1	1	1	0	0	1	2	3	3	5	2	4	0.249551	0	51	0	9	3	4	79940	100000	1	0	1
2022	562	1	1	0	1	1	0	1	2	3	4	5	4	5	0.18938	0	53	1	9	3	4	85470	81000	1	1	1
2020	563	1	0	0	0	0	0	1	3	5	2	4	4	5	0.0407939	0	46	1	9	4	4	68900	70000	1	0	0
2022	563	1	0	0	1	1	0	1	3	4	3	5	5	5	0.0864598	0	48	1	9	3	4	136496	163500	1	0	0
2020	564	1	0	0	1	0	1	1	5	4	1	5	5	4	0.160567	0	45	1	9	4	4	42600	92500	1	0	1
2022	564	1	0	0	1	1	1	1	4	1	5	5	5	5	0.193071	0	47	1	9	3	4	70120	64900	0	0	1
2020	565	1	0	0	0	0	0	1	3	3	3	4	2	3	0.0293075	0	42	1	9	3	4	42600	92500	1	0	1
2022	565	1	0	0	1	0	0	1	2	3	3	4	3	2	0.0316154	0	44	1	9	3	4	70120	64900	0	0	1
2020	566	1	0	0	1	1	0	1	2	4	4	5	5	4	0.0810892	0	20	0	12	4	4	42600	92500	1	0	0
2022	566	1	0	0	1	0	0	1	2	3	4	5	3	3	0.0365299	1	22	0	12	3	4	70120	64900	0	0	1
2020	567	1	0	0	1	1	0	1	6	5	5	5	5	5	0.110366	0	37	1	9	2	5	67360	60000	1	0	1
2022	567	1	0	0	1	1	0	1	5	4	3	5	4	3	0.0914975	0	39	1	9	3	5	72140	100000	0	0	1
2020	568	1	0	0	1	0	0	1	5	3	2	3	4	4	0.0513314	0	56	1	6	1	2	21200	22600	0	0	0
2022	568	1	0	0	1	0	0	1	5	3	3	4	3	3	0.0502426	0	58	1	6	3	2	35710	48300	1	0	1
2020	569	1	0	0	1	1	0	1	5	4	5	3	5	5	0.100667	0	47	1	9	2	3	45400	80000	0	1	0
2022	569	1	0	0	1	1	0	1	5	5	4	5	5	3	0.0984984	0	49	1	9	1	3	69200	120000	1	0	1
2020	570	1	1	1	1	0	0	1	1	2	4	4	3	2	0.240439	0	21	0	9	3	1	33360	66500	0	0	0
2022	570	1	1	1	1	1	0	1	1	3	4	4	1	1	0.273381	0	23	0	6	3	1	25140	40000	0	0	0
2020	571	1	1	1	1	0	0	1	5	5	5	5	5	5	0.284051	0	21	0	13	3	3	87300	35000	1	0	0
2022	571	1	0	1	1	1	0	1	3	5	5	5	5	5	0.197838	1	23	0	15	5	3	34400	62000	0	0	1
2020	572	1	1	1	1	1	0	1	2	4	4	5	4	4	0.29426	0	26	0	15	3	3	38400	20000	1	0	0
2022	572	1	1	1	1	0	0	1	1	4	4	4	5	5	0.256207	0	28	0	15	2	1	60470	40000	0	0	0
2020	573	1	0	1	0	0	0	1	1	5	5	5	5	5	0.142937	0	35	1	9	1	6	20220	20100	1	0	0
2022	573	1	0	0	1	0	0	1	7	5	5	5	5	2	0.0738522	0	37	1	9	2	6	16680	30000	1	0	0
2020	574	1	0	1	1	1	1	1	3	3	3	3	3	4	0.285905	0	50	1	9	3	4	43080	150000	1	0	0
2022	574	1	0	0	1	0	0	1	2	5	3	5	5	5	0.0480163	0	52	1	9	3	4	67320	130000	1	0	0
2020	575	1	0	0	1	0	0	1	4	2	2	4	3	1	0.0354609	0	53	1	0	4	6	27000	20000	1	0	0
2022	575	1	0	0	1	0	0	1	1	2	1	5	1	1	0.0135739	0	57	1	0	3	6	85700	27000	1	0	0
2020	576	1	0	0	1	1	0	1	4	3	4	5	4	5	0.0894108	0	33	1	15	5	6	27000	20000	1	0	0
2022	576	1	0	0	1	1	0	1	5	5	4	4	3	4	0.0961887	0	35	1	0	3	6	85700	27000	1	0	0
2020	577	1	0	0	1	0	0	1	5	2	2	4	1	1	0.0372386	0	38	1	9	3	5	165600	60000	0	0	0
2022	577	1	0	0	1	0	0	1	2	1	2	3	1	2	0.0191966	0	40	1	9	4	5	109500	200000	1	0	0
2020	578	1	0	0	1	0	0	1	3	5	5	5	5	5	0.0579681	0	31	1	12	2	5	69560	38800	0	0	0
2022	578	1	0	0	1	0	0	1	1	5	5	5	5	5	0.0469273	0	33	1	12	2	4	68490	71300	0	0	0
2020	579	1	0	0	1	0	1	1	5	5	5	5	5	5	0.174409	0	45	0	9	1	2	10000	6000	0	0	0
2022	579	1	0	0	1	0	0	1	1	3	3	3	3	3	0.0275281	0	47	0	9	3	2	28300	10000	1	0	0
2020	580	1	0	0	1	0	0	1	1	1	3	5	3	1	0.0188343	0	33	1	6	3	6	109900	14500	1	0	0
2022	580	1	0	0	1	0	0	1	1	3	5	5	4	2	0.0330306	0	35	1	0	2	6	135400	20000	1	0	0
2020	581	1	0	0	1	0	0	1	1	3	2	4	1	1	0.0180706	0	41	1	9	4	3	41100	50000	1	0	0
2022	581	1	0	0	0	0	0	1	1	3	3	4	2	2	0.0162007	0	43	1	9	4	3	13610	50000	1	0	1
2020	582	1	0	0	0	0	1	1	2	4	3	5	4	2	0.134411	0	18	0	11	2	4	36080	30000	1	0	0
2022	582	1	1	0	1	1	1	1	3	5	3	4	5	2	0.298953	0	20	0	14	3	4	35000	80000	1	0	0
2020	583	1	0	0	1	1	1	1	2	5	5	5	5	5	0.193685	0	24	1	12	3	3	53400	30000	0	0	0
2022	583	1	0	0	1	1	0	1	2	5	5	5	5	5	0.0882846	0	26	1	12	3	3	54300	40000	0	0	0
2020	584	1	0	0	1	1	0	1	1	3	3	3	3	3	0.063365	0	36	1	9	3	5	122800	50000	1	0	1
2022	584	1	0	0	1	1	0	1	1	3	3	5	1	1	0.056756	0	38	1	9	2	5	121400	221200	1	0	1
2020	585	1	1	0	1	1	1	1	5	5	5	5	5	5	0.321256	0	33	1	9	2	5	122800	50000	1	0	0
2022	585	1	0	0	1	1	0	1	2	5	5	5	5	5	0.0882846	0	35	1	9	5	5	121400	221200	1	0	0
2020	586	1	0	0	1	0	0	1	4	5	3	5	4	2	0.0509881	0	47	1	9	3	2	25080	63850	1	0	1
2022	586	1	0	1	1	1	0	1	2	4	3	5	3	4	0.179164	0	49	1	9	5	2	89040	493600	1	0	1
2020	587	1	0	0	0	0	0	1	5	5	5	5	5	5	0.0609861	0	49	1	6	5	3	14820	42090	1	0	0
2022	587	1	0	0	1	0	0	1	1	1	1	5	1	1	0.0106601	0	51	1	6	5	3	109620	93000	1	0	0
2020	588	1	1	0	1	1	1	1	3	5	5	5	5	5	0.310215	0	41	1	9	3	7	109960	150000	1	0	1
2022	588	1	0	0	1	1	0	1	4	4	4	5	5	5	0.094196	0	43	1	9	3	7	228740	180000	1	0	1
2020	589	1	0	0	1	1	0	1	4	5	5	5	2	4	0.0916454	0	41	1	9	4	7	109960	150000	1	0	1
2022	589	1	0	0	1	1	0	1	2	4	4	5	5	5	0.0831551	0	43	1	9	3	7	228740	180000	1	0	1
2020	590	1	0	0	1	1	0	1	5	3	4	4	4	4	0.0922325	0	31	1	9	2	6	109400	150000	1	0	0
2022	590	1	0	0	1	1	1	1	6	5	5	5	5	5	0.215767	0	33	1	15	3	4	82620	56700	0	0	0
2020	591	1	0	1	1	0	0	1	3	1	5	5	4	1	0.140211	0	23	1	12	3	4	28076	74100	1	0	0
2022	591	1	0	1	1	0	0	1	3	4	5	5	3	3	0.151212	0	25	1	12	4	3	39700	53400	1	0	0
2020	592	1	0	0	1	0	0	1	6	1	3	5	1	1	0.0426937	0	58	0	6	2	1	120900	36100	0	0	0
2022	592	1	0	0	1	0	0	1	2	5	5	5	1	1	0.0366986	0	60	0	0	2	1	30238	17300	0	0	0
2020	593	1	0	0	1	1	0	1	5	4	3	3	3	3	0.0883605	0	33	1	9	3	5	30680	30000	1	0	0
2022	593	1	0	0	1	1	0	1	5	3	3	4	4	4	0.0900168	0	35	1	9	2	5	42920	26500	0	0	0
2020	594	1	0	0	1	1	0	1	5	4	4	4	4	4	0.0951463	0	31	1	12	2	5	30680	30000	1	0	0
2022	594	1	0	0	1	1	0	1	6	3	2	4	2	4	0.0895788	0	33	1	12	2	5	42920	26500	0	0	0
2020	595	1	0	0	1	1	0	1	4	5	5	5	4	1	0.0891905	0	34	1	9	3	5	35900	105192	1	0	0
2022	595	1	0	0	1	1	0	1	5	5	5	5	5	5	0.104846	0	36	1	9	3	5	43230	103926	1	0	1
2020	596	1	0	0	1	0	0	1	1	2	3	4	4	2	0.0250526	0	49	1	9	3	2	11000	25000	1	0	1
2022	596	1	0	0	1	0	0	1	2	1	3	5	2	2	0.0245493	0	51	1	9	3	2	20900	40000	1	0	1
2020	597	1	0	0	1	0	0	1	1	1	3	1	1	1	0.0125603	0	52	1	6	3	2	11000	25000	1	0	1
2022	597	1	0	0	1	0	0	1	1	3	3	5	5	3	0.0325365	0	54	1	6	3	2	20900	40000	1	0	1
2020	598	1	0	1	1	0	1	1	5	3	2	5	3	2	0.256027	0	54	1	9	3	3	33400	308500	1	0	1
2022	598	1	0	1	1	0	0	1	1	5	3	5	5	3	0.142397	0	56	1	9	4	3	49660	50000	0	0	1
2020	599	1	0	0	0	0	0	1	3	3	3	5	3	5	0.0359435	0	47	1	9	4	3	33400	308500	1	0	0
2022	599	1	0	1	1	1	0	1	1	5	4	5	4	5	0.18271	0	49	1	9	4	3	49660	50000	0	0	0
2020	600	1	0	0	0	0	0	1	1	1	1	3	4	1	0.0069857	0	51	1	0	1	2	42140	37200	1	0	1
2022	600	1	0	0	1	1	0	1	1	1	1	5	1	1	0.0464971	0	53	1	0	1	2	38570	30000	1	0	1
2020	601	1	0	0	0	0	0	1	1	1	1	1	1	1	0.000106	0	51	1	9	1	2	42140	37200	1	0	0
2022	601	1	0	0	0	0	0	1	1	3	3	5	3	3	0.0207708	0	53	1	9	1	2	38570	30000	1	0	1
2020	602	1	0	0	1	0	0	1	4	5	5	5	5	1	0.055225	0	52	1	9	3	3	33620	88500	0	0	1
2022	602	1	0	0	1	1	0	1	2	5	5	5	5	5	0.0882846	0	54	1	9	3	2	60500	71000	0	0	1
2020	603	1	0	1	1	0	0	1	1	2	5	5	1	1	0.12647	0	55	1	9	3	3	33620	88500	0	0	0
2022	603	1	0	0	1	0	0	1	5	1	4	5	2	1	0.0412604	0	57	1	9	4	2	60500	71000	0	0	1
2020	604	1	0	0	1	0	0	1	4	5	5	4	4	3	0.0568526	0	21	0	9	2	3	33620	88500	0	0	0
2022	604	1	0	0	1	1	0	1	4	2	5	5	3	1	0.0785777	0	23	0	9	3	1	60060	47100	0	1	0
2020	605	1	0	1	1	1	0	1	3	2	2	4	2	3	0.17207	0	42	1	9	3	4	87560	112000	1	0	1
2022	605	1	0	0	1	0	0	1	1	5	3	3	3	3	0.0333556	0	44	1	9	3	3	104000	133200	1	0	0
2020	606	1	0	0	1	1	0	1	2	2	4	5	4	5	0.0754562	0	41	1	9	3	4	87560	112000	1	0	1
2022	606	1	0	0	1	1	0	1	2	3	5	5	3	3	0.0745825	0	43	1	9	3	3	104000	133200	1	0	1
2020	607	1	1	0	1	1	0	1	2	3	2	5	3	4	0.181011	0	34	1	16	3	3	84960	217100	1	0	1
2022	607	1	0	1	1	1	1	1	1	5	3	5	4	5	0.285894	0	36	1	16	3	3	75200	150000	0	0	0
2020	608	1	0	0	0	1	0	1	1	3	1	5	3	3	0.0521763	0	41	1	9	4	4	19920	40000	1	0	0
2022	608	1	0	0	1	1	0	1	2	3	2	4	4	4	0.0712398	0	43	1	9	2	5	31040	60000	1	0	1
2020	609	1	0	1	1	0	0	1	1	1	1	5	1	5	0.122956	0	56	1	9	3	4	55696	116900	1	0	0
2022	609	1	0	0	0	0	0	1	1	1	1	5	1	1	0.0026372	0	58	0	9	3	1	194300	11000	0	0	0
2020	610	1	0	0	0	1	0	1	2	2	3	3	2	2	0.0540114	0	53	1	9	3	3	29755	38900	1	0	0
2022	610	1	0	0	1	1	0	1	5	3	3	5	3	3	0.0867123	0	55	1	9	5	3	47960	50000	1	0	0
2020	611	1	0	0	0	0	0	1	1	1	1	5	3	3	0.0105118	0	51	1	9	5	3	29755	38900	1	0	0
2022	611	1	0	0	0	1	0	1	6	3	2	5	3	2	0.0799282	0	53	1	9	5	3	47960	50000	1	0	0
2020	612	1	0	0	0	0	0	1	2	4	4	4	4	4	0.0347252	0	47	1	9	3	2	17690	17280	1	0	0
2022	612	1	0	0	1	1	0	1	1	5	1	5	1	2	0.0602181	0	49	1	9	3	3	30160	85000	1	0	1
2020	613	1	0	0	1	0	0	1	1	4	3	5	4	3	0.0335789	0	51	1	6	3	2	17690	17280	1	0	0
2022	613	1	0	0	1	1	0	1	1	3	4	5	4	2	0.0666518	0	53	1	6	3	3	30160	85000	1	0	1
2020	614	1	0	0	1	1	0	1	2	4	4	5	5	4	0.0810892	0	37	1	9	2	4	57560	55600	1	0	0
2022	614	1	0	0	0	1	1	1	2	3	5	5	5	5	0.179835	1	39	1	9	3	4	27008	33900	1	0	0
2020	615	1	0	0	1	1	0	1	5	3	3	5	5	3	0.0904551	0	48	1	6	2	5	111800	70900	1	0	0
2022	615	1	0	0	1	1	0	1	4	5	5	5	4	3	0.0933223	1	50	0	6	4	2	58000	50000	0	0	0
2020	616	1	0	0	1	0	0	1	3	2	5	5	4	2	0.0411577	0	54	1	9	3	2	35556	41800	1	0	1
2022	616	1	0	0	1	0	0	1	1	1	5	5	2	3	0.0255262	1	56	1	9	2	2	61120	75000	1	0	1
2020	617	1	0	0	1	1	0	1	2	4	5	5	3	4	0.0795621	0	49	1	8	2	2	35556	41800	1	0	0
2022	617	1	0	0	1	1	0	1	2	3	4	5	2	5	0.0746272	0	51	1	8	2	2	61120	75000	1	0	0
2020	618	1	1	0	1	1	1	1	2	4	2	2	4	3	0.287232	1	44	1	16	4	2	242156	84600	1	0	1
2022	618	1	0	0	1	1	1	1	2	4	5	5	4	4	0.186834	1	46	1	16	4	2	80620	100000	1	0	1
2020	619	1	0	0	0	0	0	1	2	2	2	3	3	3	0.0198961	0	42	1	9	3	2	242156	84600	1	0	1
2022	619	1	0	0	1	1	0	1	3	3	3	4	3	3	0.0750387	0	44	1	9	4	2	80620	100000	1	0	1
2020	620	1	0	0	1	0	0	1	7	5	5	5	5	2	0.0738522	0	54	1	6	3	4	30000	75000	1	0	1
2022	620	1	0	0	1	0	1	1	1	5	5	5	5	2	0.14613	0	56	1	6	3	3	95200	68080	1	0	0
2020	621	1	0	0	1	0	0	1	2	3	4	4	5	2	0.0375739	1	55	1	9	3	4	30000	75000	1	0	1
2022	621	1	0	0	1	0	0	1	5	4	4	5	3	3	0.0560049	1	57	1	9	3	3	95200	68080	1	0	1
2020	622	1	0	0	1	1	1	1	1	2	4	4	5	2	0.170377	0	30	1	12	3	5	57000	100000	0	0	0
2022	622	1	0	0	1	1	0	1	4	1	5	5	1	3	0.076053	0	32	1	12	2	5	42300	180000	1	0	1
2020	623	1	0	0	1	1	0	1	5	2	5	5	5	4	0.0940387	0	25	1	9	3	5	57000	100000	0	0	0
2022	623	1	0	0	1	1	0	1	5	1	5	5	4	5	0.0913194	0	27	1	9	4	5	42300	180000	1	0	1
2020	624	1	0	1	1	0	0	1	1	5	5	5	5	3	0.146828	0	54	0	9	1	1	21900	30000	0	0	1
2022	624	1	0	1	1	0	0	1	1	3	3	5	3	3	0.132826	0	56	0	9	2	1	16320	29000	0	0	1
2020	625	1	0	0	1	1	0	1	4	5	5	5	5	5	0.0993255	0	29	1	10	3	5	63300	100000	1	0	1
2022	625	1	0	1	1	1	0	1	2	3	3	5	3	5	0.178316	0	31	1	10	4	6	51000	30000	1	0	1
2020	626	1	0	0	1	1	0	1	5	3	5	5	3	3	0.0911438	0	32	1	9	1	5	54400	50000	1	0	1
2022	626	1	0	0	1	1	0	1	2	3	5	5	3	5	0.0787143	0	34	1	9	3	5	72900	52000	1	0	1
2020	627	1	0	0	1	1	0	1	3	1	2	4	3	3	0.0669954	0	45	1	7	2	3	108800	68800	1	0	1
2022	627	1	0	0	1	1	0	1	2	3	4	5	5	1	0.0719777	0	47	1	7	1	3	38500	44500	1	0	1
2020	628	1	0	0	1	1	0	1	1	2	3	5	3	4	0.0637827	0	45	1	7	3	3	108800	68800	1	0	0
2022	628	1	0	0	1	1	0	1	1	3	3	5	3	5	0.0687624	0	47	1	7	3	3	38500	44500	1	0	0
2020	629	1	0	0	1	0	0	1	3	3	4	4	3	3	0.0414175	0	23	0	9	2	3	108800	68800	1	0	0
2022	629	1	0	0	1	0	0	1	1	3	3	3	3	3	0.0275281	0	25	0	9	2	3	38500	44500	1	0	0
2020	630	1	0	1	1	0	0	1	1	1	3	3	2	1	0.11973	0	31	1	9	2	5	43530	45030	0	1	1
2022	630	1	0	1	1	1	0	1	2	1	3	5	1	2	0.162548	0	33	1	6	1	5	33570	78220	1	1	1
2020	631	1	0	0	1	1	1	1	6	3	3	4	3	3	0.197	1	37	1	15	3	6	252400	240000	0	0	0
2022	631	1	0	0	1	1	0	1	4	4	5	3	3	4	0.0893374	0	39	1	12	3	6	72200	151000	0	0	1
2020	632	1	0	1	1	1	0	1	4	5	5	5	5	5	0.203358	0	24	1	9	1	4	35680	36000	1	0	1
2022	632	1	0	0	1	1	0	1	2	5	4	5	5	5	0.0860689	0	26	1	9	3	5	31980	63000	0	0	1
2020	633	1	1	1	1	1	1	1	4	5	5	5	5	4	0.417702	0	34	1	9	2	5	50000	50000	1	0	1
2022	633	1	1	1	1	1	0	1	5	5	5	5	5	5	0.319888	0	36	1	9	3	5	75080	80000	1	0	1
2020	634	1	1	1	1	1	1	1	4	5	3	5	4	4	0.4114	0	26	1	12	3	5	50000	50000	1	0	0
2022	634	1	1	1	1	1	1	1	4	5	3	5	5	3	0.411205	1	28	1	12	3	5	75080	80000	1	0	0
2020	635	1	0	0	1	0	0	1	1	1	1	5	1	1	0.0106601	0	50	1	6	3	3	29590	20000	1	0	1
2022	635	1	0	0	1	0	0	1	1	5	5	5	5	4	0.0448614	0	52	1	6	3	2	17460	15000	1	0	1
2020	636	1	0	0	0	0	0	1	3	5	1	5	1	5	0.0335968	0	52	1	0	1	3	29590	20000	1	0	1
2022	636	1	0	0	1	1	0	1	1	5	5	5	5	5	0.0827642	0	54	1	0	3	2	17460	15000	1	0	1
2020	637	1	0	0	0	0	0	1	4	5	5	5	5	5	0.0554656	0	28	1	12	3	8	11400	20000	1	0	0
2022	637	1	0	0	1	0	1	1	4	5	5	5	5	5	0.168889	0	30	1	12	3	8	43640	77000	1	0	1
2020	638	1	1	0	1	1	0	1	5	4	4	3	2	3	0.199714	0	33	0	9	3	2	16000	247457	0	0	1
2022	638	1	0	0	1	0	1	1	2	4	3	3	4	4	0.1453	0	35	0	9	3	2	1390	3500	1	0	1
2020	639	1	1	0	1	1	1	1	1	4	4	5	4	5	0.292173	0	31	0	15	3	1	17676	100000	0	0	0
2022	639	1	1	1	1	0	0	1	1	4	5	3	4	1	0.247655	1	33	0	15	3	1	16880	180000	1	0	1
2020	640	1	0	0	1	1	0	1	1	5	5	5	5	5	0.0827642	0	51	0	6	1	1	43220	30000	1	0	0
2022	640	1	0	0	1	1	0	1	1	5	5	5	5	5	0.0827642	0	53	0	6	1	1	23890	32500	1	0	0
2020	641	1	0	0	1	1	1	1	2	4	3	3	3	3	0.1772	0	33	1	15	3	2	41740	138000	0	0	0
2022	641	1	0	0	1	1	0	1	2	4	3	3	3	3	0.0717992	1	35	1	15	3	3	80820	80000	0	0	0
2020	642	1	0	0	0	0	0	1	1	1	1	4	3	2	0.0078131	0	32	1	12	1	4	28020	10000	1	0	0
2022	642	1	0	0	1	0	0	1	5	1	2	5	5	4	0.0486408	0	34	1	12	1	4	137270	11000	1	0	1
2020	643	1	1	0	1	1	1	1	1	4	5	5	5	5	0.29626	0	30	1	9	4	6	114160	70800	1	0	1
2022	643	1	1	1	1	1	0	1	1	4	5	5	5	3	0.290761	0	32	1	9	3	6	118640	103000	1	0	1
2020	644	1	0	0	1	0	0	1	1	5	1	5	5	3	0.0339326	0	27	1	9	3	6	114160	70800	1	0	0
2022	644	1	0	0	1	1	1	1	1	5	5	5	5	5	0.188165	0	29	1	9	4	6	118640	103000	1	0	0
2020	645	1	0	0	1	0	0	1	1	3	4	5	5	3	0.0347522	0	46	1	6	3	2	242240	48500	1	0	1
2022	645	1	0	0	1	0	0	1	2	5	5	5	5	3	0.0483159	0	48	1	6	3	2	39800	31080	1	0	1
2020	646	1	1	0	1	0	0	1	1	5	3	5	3	3	0.145631	1	36	1	16	3	5	63760	160000	0	1	0
2022	646	1	1	0	1	1	1	1	1	4	4	4	3	3	0.285537	1	38	1	16	3	3	66360	100000	0	0	1
2020	647	1	1	1	1	0	0	1	2	5	5	5	5	5	0.26749	0	35	1	16	3	5	63760	160000	0	1	0
2022	647	1	1	0	1	0	0	1	1	3	3	3	3	3	0.138538	0	37	1	16	3	3	66360	100000	0	0	0
2020	648	1	0	0	1	1	0	1	2	3	3	4	3	2	0.0674523	1	33	0	9	2	2	34300	15000	1	0	1
2022	648	1	0	0	1	0	0	1	3	1	3	3	2	1	0.0267382	0	35	0	9	1	2	89840	30000	1	0	1
2020	649	1	0	0	1	1	0	1	1	1	1	5	5	1	0.0539826	0	51	1	6	1	3	11540	22300	1	0	0
2022	649	1	1	1	1	1	0	1	5	3	5	5	5	4	0.311995	0	53	1	6	5	3	45720	50000	1	0	1
2020	650	1	0	0	1	1	0	1	4	5	3	5	4	3	0.0888909	0	50	1	9	3	2	35800	5000	1	0	1
2022	650	1	0	0	1	1	0	1	3	3	4	5	5	2	0.0795641	0	52	1	9	3	1	51620	10480	1	0	1
2020	651	1	0	0	1	0	0	1	3	4	4	4	4	4	0.0482685	0	55	1	9	3	4	34800	40000	1	0	1
2022	651	1	0	0	1	1	0	1	1	5	5	5	5	5	0.0827642	0	57	1	9	3	4	44600	50000	1	0	1
2020	652	1	1	1	1	1	0	1	7	5	4	5	5	5	0.328713	0	20	0	14	2	4	34800	40000	1	0	0
2022	652	1	1	1	1	1	1	1	7	4	3	5	4	4	0.425047	0	22	0	16	2	4	44600	50000	1	0	0
2020	653	1	0	0	0	0	0	1	1	3	1	4	3	4	0.0177724	0	52	1	6	3	7	42100	211236	0	0	0
2022	653	1	0	0	1	0	0	1	1	4	3	4	4	4	0.035012	0	54	1	6	4	6	35920	59350	1	0	0
2020	654	1	0	0	1	0	0	1	5	4	3	5	5	5	0.0616638	0	46	0	9	1	4	30310	35000	1	0	1
2022	654	1	0	0	1	0	0	1	3	5	5	5	5	5	0.0579681	0	48	0	9	3	4	108936	71992	1	0	1
2020	655	1	0	0	1	1	1	1	6	3	2	5	5	2	0.197094	0	21	0	15	2	4	30310	35000	1	0	0
2022	655	1	0	0	1	1	1	1	5	2	3	5	5	5	0.197074	0	23	0	15	3	4	108936	71992	1	0	0
2020	656	1	0	0	1	1	0	1	3	3	4	5	5	4	0.0836959	0	38	1	8	2	3	100660	80000	1	0	1
2022	656	1	0	1	1	1	0	1	2	3	3	4	3	2	0.171485	0	40	1	8	1	3	169320	70000	1	0	0
2020	657	1	0	1	1	0	0	1	4	3	3	5	3	3	0.149388	0	37	1	12	3	3	41100	40000	1	0	0
2022	657	1	0	0	1	0	0	1	4	3	3	5	3	3	0.045355	0	39	1	12	5	3	70500	81600	1	0	0
2020	658	1	0	0	1	1	0	1	2	3	3	4	3	3	0.0695182	0	35	1	9	2	3	41100	40000	1	0	0
2022	658	1	0	0	1	1	0	1	4	3	5	5	5	5	0.0934979	0	37	1	6	2	3	70500	81600	1	0	0
2020	659	1	0	0	1	1	0	1	1	5	4	5	4	3	0.0745453	0	38	0	9	1	1	13900	5000	0	0	0
2022	659	1	0	0	1	1	0	1	4	3	3	5	4	4	0.0851292	0	40	0	9	3	1	42956	96500	0	0	1
2020	660	1	1	0	1	1	0	1	1	5	5	5	5	5	0.193774	0	21	0	15	3	1	23800	50000	0	0	0
2022	660	1	1	0	1	1	0	1	2	4	3	3	3	4	0.184875	1	23	0	15	3	1	29100	92200	0	0	0
2020	661	1	0	0	1	0	0	1	1	2	4	5	5	4	0.0339043	0	47	1	6	2	2	24280	116500	0	0	1
2022	661	1	0	0	1	1	0	1	1	3	5	5	5	4	0.0748707	0	49	1	6	3	2	48000	76500	0	0	0
2020	662	1	0	0	1	0	0	1	3	5	5	5	5	5	0.0579681	1	47	1	6	4	2	24280	116500	0	0	0
2022	662	1	0	0	1	0	0	1	1	3	5	5	5	5	0.0410997	1	49	1	6	3	2	48000	76500	0	0	0
2020	663	1	0	0	1	1	0	1	2	4	5	5	3	3	0.0774962	0	19	0	12	3	4	26600	36000	1	0	0
2022	663	1	0	1	0	1	0	1	4	4	1	5	4	4	0.179621	0	21	0	12	3	4	42464	83000	1	0	0
2020	664	1	0	1	1	0	0	1	2	3	3	4	4	1	0.135454	0	44	1	8	3	3	12360	33000	0	0	0
2022	664	1	0	0	1	0	0	1	1	1	1	5	1	1	0.0106601	0	46	1	6	1	3	27074	38300	1	0	1
2020	665	1	0	0	1	0	0	1	6	3	4	4	4	3	0.0598502	0	45	1	9	3	3	12360	33000	0	0	0
2022	665	1	0	0	1	0	0	1	1	1	2	4	4	2	0.0199231	0	47	1	9	1	3	27074	38300	1	0	1
2020	666	1	0	1	1	1	0	1	4	5	3	5	5	5	0.198927	1	27	1	15	3	2	103130	80000	0	0	0
2022	666	1	1	0	1	0	1	1	2	5	4	5	5	3	0.26251	1	29	1	15	2	2	128210	100000	1	0	1
2020	667	1	0	0	1	0	0	1	1	2	3	5	3	1	0.0217481	0	59	1	9	2	2	23500	43300	0	0	0
2022	667	1	0	0	1	0	0	1	1	3	3	5	3	1	0.0246619	0	61	1	6	2	5	37600	33900	0	0	0
2020	668	1	0	0	0	0	0	1	1	1	2	3	1	1	0.0035873	0	62	1	0	1	2	23500	43300	0	0	0
2022	668	1	0	0	1	0	0	1	2	2	3	5	2	2	0.0274631	0	64	1	0	1	5	37600	33900	0	0	0
2020	669	1	0	1	1	1	0	1	4	3	5	5	5	5	0.197531	0	32	1	6	3	4	56080	30000	1	0	0
2022	669	1	0	1	1	1	0	1	5	3	5	5	5	5	0.203051	0	34	1	6	3	4	61240	50000	1	0	1
2020	670	1	0	1	1	1	0	1	5	5	4	5	5	5	0.206663	0	44	1	12	3	3	114700	50000	0	0	0
2022	670	1	0	0	1	0	0	1	1	5	3	5	5	3	0.038364	1	46	1	9	3	3	71820	80000	0	0	0
2020	671	1	0	0	1	1	0	1	2	5	5	5	5	5	0.0882846	0	42	1	12	3	3	114700	50000	0	0	0
2022	671	1	0	0	1	1	0	1	1	5	5	5	5	5	0.0827642	0	44	1	9	2	3	71820	80000	0	0	0
2020	672	1	0	0	1	0	0	1	4	5	2	5	5	2	0.0506437	0	49	1	6	2	2	7000	15000	0	0	1
2022	672	1	0	0	1	0	0	1	2	5	5	5	5	5	0.0524477	0	51	1	6	2	2	4456	16000	1	0	1
2020	673	1	0	0	1	0	0	1	1	2	2	2	2	2	0.0178285	0	54	1	6	2	2	7000	14500	0	0	1
2022	673	1	0	0	1	0	0	1	1	5	5	5	5	5	0.0469273	0	56	1	6	1	2	4456	16000	1	0	1
2020	674	1	0	0	1	1	0	1	4	5	5	5	5	5	0.0993255	0	58	1	6	3	4	77460	100000	1	0	1
2022	674	1	0	0	1	0	0	1	4	5	5	5	5	5	0.0634886	0	60	1	6	5	3	56580	60000	0	0	1
2020	675	1	0	0	1	0	0	1	1	1	3	3	1	2	0.0158918	0	54	1	6	3	4	77460	100000	1	0	1
2022	675	1	0	0	1	0	0	1	1	3	2	5	5	2	0.0282549	0	56	1	6	3	3	56580	60000	0	0	1
2020	676	1	0	0	1	1	0	1	1	1	1	5	3	1	0.0502398	0	49	1	6	3	3	56626	85800	1	0	1
2022	676	1	0	0	1	1	0	1	1	3	3	3	3	3	0.063365	0	51	1	6	3	3	54460	80780	1	0	1
2020	677	1	0	0	1	0	0	1	2	3	3	5	5	3	0.0380569	0	50	1	6	3	3	56626	85800	1	0	1
2022	677	1	0	0	1	1	0	1	1	1	4	5	3	3	0.0610188	0	52	1	6	2	3	54460	80780	1	0	0
2020	678	1	0	0	0	1	0	1	2	3	5	4	3	2	0.0638608	0	36	1	9	3	5	103104	148000	1	0	1
2022	678	1	0	0	1	0	0	1	2	3	4	5	4	5	0.042533	0	38	1	9	3	5	72324	50000	1	0	1
2020	679	1	0	0	1	1	1	1	3	2	4	3	3	2	0.177042	0	36	1	9	1	5	103104	148000	1	0	0
2022	679	1	0	0	1	1	0	1	1	2	5	5	4	5	0.0721514	0	38	1	9	1	5	72324	50000	1	0	1
2020	680	1	1	0	1	1	1	1	2	4	4	4	5	4	0.296866	1	32	1	16	4	7	42100	211236	0	0	1
2022	680	1	1	0	1	1	1	1	1	4	4	5	5	4	0.291979	1	34	1	16	3	6	35920	59350	1	0	1
2020	681	1	0	1	1	1	0	1	4	5	5	5	4	5	0.201487	0	32	1	12	3	7	120000	255000	0	0	0
2022	681	1	0	1	1	1	0	1	2	3	4	4	3	4	0.177833	0	34	1	12	3	6	156600	200000	1	0	0
2020	682	1	0	1	1	1	0	1	5	5	5	5	5	5	0.208879	0	22	1	9	2	5	40000	77000	1	0	0
2022	682	1	0	0	1	1	0	1	3	5	5	5	5	5	0.093805	0	24	1	9	2	5	30000	150000	1	0	0
2020	683	1	1	0	1	0	1	1	4	3	3	4	4	4	0.26507	0	58	1	15	3	2	78260	120000	1	0	0
2022	683	1	1	0	1	0	1	1	5	4	3	4	4	4	0.273504	0	60	1	15	3	2	79300	109800	1	0	0
2020	684	1	0	0	1	0	0	1	4	5	5	5	5	5	0.0634886	0	47	1	6	3	2	23900	50000	1	0	0
2022	684	1	0	0	1	1	0	1	6	5	5	5	5	5	0.110366	0	49	1	6	2	2	57420	50000	1	0	0
2020	685	1	0	0	1	0	0	1	2	1	3	5	4	1	0.0262262	0	42	1	9	4	5	109840	290900	1	0	1
2022	685	1	0	0	1	0	0	1	2	1	2	3	2	1	0.019002	0	44	1	9	2	4	86310	50000	1	0	1
2020	686	1	0	0	1	1	0	1	3	2	3	2	2	1	0.0648561	0	52	0	15	1	1	45564	40000	1	0	1
2022	686	1	0	0	1	1	0	1	1	3	2	3	2	3	0.0592779	0	54	0	15	1	1	50240	25500	1	0	1
2020	687	1	1	0	0	0	1	1	2	4	4	5	5	3	0.251574	1	29	0	16	3	3	70630	72410	1	0	0
2022	687	1	0	0	0	0	0	1	7	5	2	5	4	5	0.0635084	0	31	0	16	3	3	84136	100000	1	0	0
2020	688	1	0	0	1	0	1	1	6	5	2	5	5	5	0.173283	0	50	1	6	3	5	258600	500000	1	0	0
2022	688	1	0	0	1	0	0	1	4	5	4	5	5	5	0.0612729	0	52	1	6	3	5	36144	100000	1	0	0
2020	689	1	0	1	0	1	0	1	2	4	3	3	4	3	0.16968	0	37	1	6	3	4	31030	64700	1	0	0
2022	689	1	0	1	1	1	0	1	2	5	3	5	4	4	0.183949	0	39	1	0	3	4	63054	120000	1	0	0
2020	690	1	0	0	0	0	0	1	5	5	3	5	5	3	0.0524229	0	43	1	6	3	4	31030	64700	1	0	0
2022	690	1	0	0	1	0	0	1	6	5	3	5	2	2	0.0582862	0	45	1	5	3	4	63054	120000	1	0	0
2020	691	1	0	0	1	1	0	1	5	3	4	5	4	3	0.0907994	0	38	1	9	3	5	109860	112600	1	0	0
2022	691	1	0	0	1	1	0	1	4	3	5	5	5	3	0.0893661	0	40	1	9	1	5	139500	130000	1	0	1
2020	692	1	0	0	1	1	0	1	1	3	5	5	5	5	0.0769366	0	37	1	9	4	5	117120	110000	1	1	0
2022	692	1	0	0	1	1	0	1	1	5	5	5	5	5	0.0827642	0	39	1	9	3	5	10000	103140	1	0	1
2020	693	1	0	0	1	0	0	1	2	4	2	3	3	3	0.0337466	0	31	1	9	3	5	6000	200000	1	0	0
2022	693	1	0	1	1	1	0	1	4	5	3	5	4	5	0.197055	0	33	1	6	3	5	160000	300000	1	0	1
2020	694	1	1	0	1	0	1	1	4	5	3	5	5	3	0.271335	1	26	0	15	3	1	47380	141500	0	1	0
2022	694	1	1	1	1	1	1	1	4	5	5	5	5	5	0.419768	0	28	0	16	4	1	75130	181500	0	1	0
2020	695	1	0	0	1	0	0	1	2	2	4	5	3	1	0.0294843	0	52	1	7	3	4	48836	39200	0	0	1
2022	695	1	0	0	1	0	0	1	4	5	5	5	5	5	0.0634886	0	54	1	7	3	4	62444	69100	0	0	1
2020	696	1	0	0	1	0	0	1	4	5	3	5	5	5	0.0590571	0	48	1	0	1	3	85547	79400	0	0	1
2022	696	1	0	0	1	0	0	1	3	5	5	5	5	5	0.0579681	1	50	1	0	5	2	35254	88600	1	0	1
2020	697	1	0	1	1	1	0	1	3	3	3	4	4	3	0.180943	0	50	1	0	3	3	85547	79400	0	0	0
2022	697	1	0	1	0	0	0	1	1	4	2	5	5	4	0.13131	0	52	1	0	2	2	35254	88600	1	0	1
2020	698	1	0	1	0	1	1	1	3	1	3	5	3	5	0.275386	0	16	0	11	2	3	85547	79400	0	0	0
2022	698	1	0	1	1	1	1	1	5	3	4	5	3	2	0.296295	0	18	0	11	3	1	41106	112000	0	0	0
2020	699	1	1	1	0	1	1	1	2	5	3	4	5	5	0.39564	0	24	0	16	3	3	51800	40000	1	0	0
2022	699	1	1	1	1	1	1	1	1	4	4	4	5	5	0.397445	1	26	0	16	2	3	79240	60000	1	0	0
2020	700	1	0	0	1	0	0	1	1	1	5	5	3	1	0.0232658	1	27	1	9	3	3	62300	25000	0	0	0
2022	700	1	1	0	1	0	0	1	1	3	3	3	3	3	0.138538	0	29	1	9	2	3	48500	35000	0	0	0
2020	701	1	0	0	0	0	0	1	1	1	1	5	5	1	0.0101228	0	51	1	9	1	6	49560	44800	1	0	1
2022	701	1	0	0	1	0	0	1	1	1	5	5	5	1	0.0270085	0	53	1	9	1	6	46220	97840	1	0	1
2020	702	1	0	0	1	0	0	1	2	5	5	5	1	5	0.0449622	0	49	1	9	2	2	37690	30000	0	0	0
2022	702	1	0	0	1	1	0	1	1	5	5	5	5	5	0.0827642	0	51	1	9	2	2	43040	43900	0	0	0
2020	703	1	0	0	1	1	0	1	2	3	5	5	3	5	0.0787143	0	43	0	6	1	5	27260	40000	1	0	1
2022	703	1	0	0	1	0	0	1	1	5	5	5	3	5	0.0431845	0	45	0	5	1	5	36292	80000	1	0	1
2020	704	1	0	0	1	0	0	1	2	3	1	5	2	4	0.0300772	0	42	0	6	1	5	27260	40000	1	0	1
2022	704	1	0	0	1	0	0	1	2	3	3	3	1	3	0.0293057	0	44	0	6	2	5	36292	80000	1	0	1
2020	705	1	0	0	1	0	0	1	2	4	3	4	4	3	0.0384665	0	39	0	9	1	3	45600	20000	1	0	0
2022	705	1	0	0	1	0	0	1	1	5	4	5	5	4	0.0426456	0	41	0	9	3	3	40980	44000	1	0	0
2020	706	1	0	0	1	1	0	1	2	3	3	5	5	2	0.0718279	0	53	1	9	5	2	10670	30000	1	0	0
2022	706	1	0	0	1	0	0	1	1	1	3	5	5	5	0.0308407	0	55	1	9	3	2	48250	80000	1	0	0
2020	707	1	0	1	1	0	0	1	2	4	1	5	2	5	0.13909	0	41	1	9	3	3	50100	70000	0	0	1
2022	707	1	0	1	1	1	0	1	5	5	3	5	5	4	0.202381	0	43	1	9	2	5	72872	99250	1	0	1
2020	708	1	0	0	1	1	0	1	1	4	3	4	5	3	0.0706543	0	39	1	9	3	3	50100	70000	0	0	0
2022	708	1	0	0	1	0	0	1	1	1	2	1	1	1	0.0103446	0	41	1	9	3	5	72872	99250	1	0	0
2020	709	1	0	0	1	0	1	1	1	4	1	5	5	2	0.134353	0	22	0	15	3	2	20840	13000	0	0	0
2022	709	1	0	1	1	1	0	1	2	5	5	5	5	5	0.192317	0	24	0	15	2	2	25700	53500	0	0	0
2020	710	1	0	0	1	0	0	1	2	3	3	5	3	1	0.0301823	0	47	1	9	1	3	25210	31030	1	0	1
2022	710	1	0	0	1	1	0	1	2	5	4	5	4	4	0.0821316	0	49	1	9	3	3	42236	58526	1	0	1
2020	711	1	0	1	1	1	0	1	4	3	3	4	4	3	0.186463	0	31	1	9	3	3	142160	120000	1	0	1
2022	711	1	0	1	1	1	0	1	2	1	5	5	5	5	0.180662	0	33	1	9	3	3	102280	110000	1	0	1
2020	712	1	0	0	1	0	0	1	1	1	2	2	3	3	0.018852	0	35	1	9	3	6	56860	50000	1	0	1
2022	712	1	0	0	1	0	0	1	2	5	3	5	3	4	0.0422076	0	37	1	9	3	6	72304	60000	1	0	1
2020	713	1	0	0	1	1	0	1	3	3	3	5	3	3	0.0756715	0	32	1	9	3	6	56860	50000	1	0	1
2022	713	1	0	0	1	1	0	1	2	3	3	4	4	3	0.0713896	0	34	1	9	2	6	72304	60000	1	0	1
2020	714	1	1	0	1	1	0	1	1	3	5	5	3	5	0.184203	0	46	1	15	3	2	208120	180600	0	1	0
2022	714	1	1	0	1	1	1	1	1	5	5	5	5	5	0.299174	1	48	1	15	3	2	285700	240300	0	1	0
2020	715	1	0	0	1	1	1	1	1	3	4	3	3	4	0.173047	1	37	1	15	2	6	131400	42000	1	0	1
2022	715	1	0	0	1	1	1	1	1	3	4	4	4	5	0.177617	1	39	1	15	3	6	90960	106200	1	0	1
2020	716	1	1	1	1	0	1	1	4	5	3	5	5	3	0.375368	0	34	1	16	3	6	131740	189000	1	0	0
2022	716	1	1	0	1	1	1	1	3	5	2	4	4	3	0.296932	0	36	1	16	3	6	185420	220000	1	1	0
2020	717	1	0	0	1	1	0	1	3	3	4	5	3	4	0.0799531	0	24	1	9	4	2	25440	80000	0	0	0
2022	717	1	0	0	1	1	0	1	2	4	4	5	5	5	0.0831551	0	26	1	9	4	4	21440	10700	1	0	1
2020	718	1	0	1	1	0	0	1	4	3	5	5	5	5	0.161694	0	29	1	12	3	6	222852	199500	1	1	0
2022	718	1	0	0	1	1	0	1	2	5	5	5	5	5	0.0882846	0	31	1	12	3	6	181440	200000	1	0	0
2020	719	1	0	1	1	0	0	1	5	3	3	4	4	5	0.160279	0	28	1	12	3	7	73920	70000	1	0	0
2022	719	1	0	0	1	0	0	1	4	4	4	5	5	5	0.0583591	0	30	1	6	3	6	122240	100000	1	0	0
2020	720	1	0	0	1	1	0	1	1	3	2	2	3	2	0.0584505	0	32	1	9	3	4	50300	40000	0	0	0
2022	720	1	0	1	1	0	0	1	1	4	4	5	5	4	0.143765	0	34	1	9	3	4	30110	45000	0	0	0
2020	721	1	0	0	1	1	0	1	3	3	3	5	5	4	0.0814801	1	33	1	13	1	3	74830	50000	0	0	1
2022	721	1	0	0	1	1	1	1	1	3	4	5	5	5	0.180121	0	35	1	15	1	3	138120	69000	0	0	1
2020	722	1	0	0	1	1	1	1	3	5	4	5	5	5	0.19699	0	31	1	15	3	3	108260	66000	0	0	0
2022	722	1	1	0	1	1	1	1	3	5	5	5	5	4	0.308149	1	33	1	15	3	3	95580	50000	0	0	0
2020	723	1	1	0	1	1	0	1	4	3	5	5	5	5	0.204508	1	27	1	16	2	2	103130	80000	0	0	0
2022	723	1	1	0	1	1	0	1	6	5	5	5	5	5	0.221376	1	29	1	16	1	2	128210	100000	1	0	1
2020	724	1	0	0	1	1	0	1	1	1	3	5	5	5	0.0666776	0	35	1	6	2	4	48772	35000	0	0	0
2022	724	1	0	1	1	0	0	1	2	1	5	5	5	5	0.144825	0	37	1	6	1	4	44230	30000	0	0	1
2020	725	1	0	1	1	1	0	1	5	5	5	5	5	5	0.208879	0	30	1	15	3	6	205344	80000	1	0	0
2022	725	1	0	0	1	1	0	1	4	3	4	5	5	5	0.0912822	0	32	1	15	4	7	147500	117200	1	0	1
2020	726	1	1	0	1	1	0	1	5	3	3	3	4	3	0.198328	0	26	1	9	3	3	62300	25000	0	0	1
2022	726	1	1	0	1	1	0	1	7	3	4	4	4	4	0.214283	0	28	1	9	1	3	48500	35000	0	0	0
2020	727	1	0	1	1	1	0	1	4	5	3	5	5	5	0.198927	0	47	1	9	3	3	62680	90000	0	1	0
2022	727	1	0	1	0	1	0	1	4	5	5	5	5	4	0.193269	0	49	1	9	3	3	54704	130800	0	0	0
2020	728	1	0	0	1	0	0	1	3	3	3	5	5	3	0.0435773	0	39	1	9	1	2	66380	98700	0	1	0
2022	728	1	0	0	1	0	0	1	4	1	3	5	4	4	0.0434647	0	41	1	9	1	2	18140	131300	1	0	1
2020	729	1	0	0	1	1	0	1	7	1	2	4	3	4	0.091143	0	39	1	9	3	2	66380	98700	0	1	0
2022	729	1	0	0	1	1	0	1	5	2	3	4	3	3	0.0831657	0	41	1	9	3	2	18140	131300	1	0	0
2020	730	1	1	0	1	1	0	1	2	5	4	5	3	5	0.193336	0	39	1	12	3	3	150420	162660	0	0	0
2022	730	1	1	0	1	1	0	1	2	5	4	5	4	4	0.193141	1	41	1	12	3	3	167960	170900	0	0	0
2020	731	1	1	1	1	1	0	1	3	1	5	5	5	4	0.295126	0	41	1	9	3	3	150420	162660	0	0	0
2022	731	1	1	0	1	1	0	1	3	1	5	5	4	5	0.191288	0	43	1	9	2	3	167960	170900	0	0	0
2020	732	1	1	0	0	1	1	1	5	4	4	3	4	4	0.302901	1	36	1	16	2	6	166740	333000	1	0	1
2022	732	1	1	0	1	1	1	1	3	5	4	4	5	5	0.307367	1	38	1	16	1	6	251140	352000	0	1	1
2020	733	1	1	1	1	0	0	1	2	5	4	5	4	3	0.259271	1	35	1	15	3	6	166740	333000	1	0	1
2022	733	1	1	1	1	1	0	1	2	4	4	5	4	4	0.29426	1	37	1	15	3	6	251140	352000	0	1	1
2020	734	1	1	0	1	1	0	1	4	3	3	3	3	4	0.193002	1	38	1	15	3	5	216320	713000	0	1	1
2022	734	1	1	0	1	1	0	1	3	5	3	5	4	5	0.198512	0	40	1	12	3	5	539900	400000	0	1	1
2020	735	1	0	0	1	0	0	1	2	2	3	3	3	4	0.0322006	1	43	1	9	2	5	156200	231500	0	0	0
2022	735	1	0	1	1	0	0	1	3	1	2	4	4	4	0.139128	1	45	1	6	2	5	158910	220000	0	0	1
2020	736	1	1	0	1	1	0	1	2	3	4	5	3	3	0.183376	1	39	1	12	3	5	87440	200000	0	0	1
2022	736	1	0	0	1	1	0	1	1	3	4	4	4	4	0.0701508	1	41	1	12	4	5	192700	313600	0	1	1
2020	737	1	0	0	1	0	0	1	5	4	3	4	3	2	0.0510905	1	43	1	15	3	5	87440	200000	0	0	1
2022	737	1	1	1	1	0	1	1	4	3	3	4	3	4	0.367231	1	45	1	15	3	5	192700	313600	0	1	1
2020	738	1	0	0	1	1	0	1	1	2	5	4	3	4	0.0675813	1	46	1	9	3	3	100000	100000	0	0	0
2022	738	1	0	0	1	1	0	1	2	5	5	5	5	5	0.0882846	0	48	1	9	4	3	138320	120200	0	0	0
2020	739	1	0	0	0	0	0	1	1	2	2	3	3	3	0.0143757	0	43	1	9	3	3	100000	100000	0	0	0
2022	739	1	0	0	0	0	0	1	1	1	1	3	3	2	0.0071803	0	45	1	6	3	3	138320	120200	0	0	0
2020	740	1	0	0	1	1	1	1	3	3	4	4	4	4	0.186592	0	23	0	15	3	3	16360	93000	0	0	1
2022	740	1	0	0	1	1	1	1	4	4	4	4	3	3	0.191089	0	25	0	15	3	3	61260	203000	0	0	1
2020	741	1	1	0	1	1	1	1	5	5	5	5	5	5	0.321256	1	26	0	16	2	5	120396	265000	0	0	1
2022	741	1	1	1	1	1	1	1	4	5	5	5	5	5	0.419768	1	28	1	16	3	5	230100	385760	0	1	1
2020	742	1	0	0	1	0	0	1	3	2	3	4	3	2	0.0342221	0	42	1	12	2	5	136200	100000	1	0	1
2022	742	1	0	0	1	0	0	1	2	3	2	3	4	3	0.0327042	0	44	1	12	1	5	83600	80000	1	0	1
2020	743	1	1	0	1	1	0	1	4	5	5	5	5	5	0.210335	1	38	1	12	3	5	68620	166100	1	0	1
2022	743	1	0	0	1	1	1	1	2	4	4	5	4	5	0.186684	1	40	1	9	4	5	63300	130000	1	0	1
2020	744	1	0	0	0	1	1	1	4	5	5	5	5	5	0.196703	1	51	1	9	3	3	66796	120000	0	0	1
2022	744	1	0	0	0	1	1	1	1	4	4	5	5	5	0.175012	1	53	1	9	3	3	50000	250000	0	0	1
2020	745	1	0	0	0	1	0	1	3	3	4	5	5	4	0.0756729	0	31	1	6	2	7	80960	60000	1	0	1
2022	745	1	0	0	1	1	0	1	2	2	4	4	3	4	0.0708861	0	33	1	6	2	7	203100	128000	1	0	1
2020	746	1	0	0	1	1	0	1	2	3	3	5	1	3	0.0664083	0	50	1	6	3	3	43640	62300	0	0	0
2022	746	1	0	0	1	1	0	1	5	1	3	5	3	3	0.0808848	0	52	1	6	3	2	63070	38000	1	0	0
2020	747	1	1	0	1	1	1	1	2	5	4	5	4	3	0.296476	1	50	1	12	3	2	394620	185000	0	0	1
2022	747	1	1	0	1	1	1	1	2	5	4	5	5	5	0.302479	1	52	1	15	3	2	110740	208300	0	0	1
2020	748	1	0	1	1	1	0	1	2	3	3	3	3	3	0.172918	0	35	1	9	3	4	110040	100000	1	0	0
2022	748	1	0	0	1	1	1	1	2	2	3	3	3	3	0.171372	0	37	1	9	3	4	108610	126200	1	0	1
2020	749	1	0	1	1	1	0	1	2	4	3	5	5	5	0.184972	0	43	1	9	3	5	190380	203800	1	0	0
2022	749	1	0	0	1	1	0	1	2	5	3	4	3	5	0.0794776	1	45	1	9	2	4	153180	200000	1	0	1
2020	750	1	0	0	1	1	0	1	2	1	5	5	1	1	0.0608803	0	49	1	0	2	3	116678	134350	1	0	0
2022	750	1	0	0	1	1	0	1	3	3	4	5	5	5	0.0857618	0	51	1	6	3	3	400092	106500	0	0	1
2020	751	1	0	0	1	0	0	1	1	5	5	5	5	5	0.0469273	0	47	1	6	3	6	72440	80000	0	0	0
2022	751	1	0	0	1	0	0	1	1	5	5	1	1	1	0.0286469	0	49	1	6	4	6	83500	73500	1	0	1
2020	752	1	0	1	1	1	0	1	4	4	5	5	5	5	0.200444	0	30	1	9	1	7	110300	296100	1	0	0
2022	752	1	0	1	1	1	0	1	5	3	3	5	5	5	0.19862	0	32	1	9	2	6	351300	180000	0	0	0
2020	753	1	1	0	1	0	1	1	1	5	4	5	5	1	0.252858	1	51	1	12	4	4	109120	255000	0	0	0
2022	753	1	1	0	1	1	1	1	1	5	3	5	5	4	0.292677	0	53	1	15	3	2	250000	406000	0	1	1
2020	754	1	0	0	1	1	0	1	3	3	3	4	3	4	0.0771046	0	35	1	9	3	3	137080	97000	0	0	1
2022	754	1	0	0	1	0	0	1	3	5	5	4	5	5	0.0573353	0	37	1	9	3	3	240860	75500	0	0	0
2020	755	1	0	0	1	0	0	1	2	3	3	3	3	3	0.0330485	0	46	1	9	2	3	149700	185000	0	0	0
2022	755	1	0	0	1	0	1	1	4	4	4	4	4	3	0.157123	1	48	1	9	3	2	57780	150000	0	1	1
2020	756	1	0	0	1	1	0	1	1	1	4	3	4	3	0.0616245	0	47	1	12	1	3	149700	185000	0	0	1
2022	756	1	0	0	1	0	0	1	1	1	5	3	5	5	0.0340065	1	49	1	12	2	2	57780	150000	0	1	1
2020	757	1	1	0	1	1	1	1	3	5	4	5	5	5	0.307999	0	24	1	15	2	3	149700	185000	0	0	0
2022	757	1	1	0	1	1	1	1	2	5	5	5	5	5	0.304695	1	26	1	15	3	2	122000	200000	0	0	0
2020	758	1	1	0	1	0	1	1	4	4	5	5	5	5	0.276985	1	47	1	15	4	3	103000	185000	0	0	1
2022	758	1	1	1	1	1	1	1	7	5	2	5	5	4	0.427617	0	49	1	15	4	3	105440	240000	0	0	1
2020	759	1	0	0	1	1	0	1	4	5	4	4	5	3	0.0923451	0	44	1	9	3	3	103000	185000	0	0	1
2022	759	1	0	0	1	1	0	1	4	4	4	4	3	4	0.0877545	1	46	1	9	4	3	105440	240000	0	0	1
2020	760	1	0	1	1	0	1	1	6	5	3	5	5	5	0.279531	0	33	1	9	3	5	371180	220000	0	0	0
2022	760	1	1	1	1	1	1	1	5	5	5	5	4	3	0.419285	1	35	1	9	2	5	179260	197000	0	0	0
2020	761	1	0	0	0	1	0	1	1	1	1	2	2	3	0.0425789	0	56	1	11	3	6	148600	242100	0	1	1
2022	761	1	0	0	0	1	0	1	1	5	1	4	4	5	0.0633742	0	58	1	11	3	6	231356	254716	1	0	1
2020	762	1	0	1	1	1	0	1	2	3	3	5	4	5	0.180187	1	31	1	12	3	6	148600	242100	0	1	0
2022	762	1	1	1	1	1	1	1	2	3	3	5	4	4	0.394531	1	33	1	9	3	6	231356	254716	1	0	0
2020	763	1	1	1	1	1	1	1	4	5	5	5	5	5	0.419768	0	31	1	15	3	6	148600	242100	0	1	0
2022	763	1	1	1	1	1	0	1	2	5	5	5	5	5	0.303327	1	33	1	15	2	6	231356	254716	1	0	1
2020	764	1	1	0	0	0	0	1	2	4	3	3	3	3	0.138949	1	33	0	15	3	3	20000	143000	0	0	0
2022	764	1	0	0	0	0	0	1	1	3	3	3	3	3	0.0195052	0	35	1	12	3	4	180020	180000	0	0	1
2020	765	1	1	0	1	0	1	1	3	5	3	4	5	4	0.267248	1	36	1	15	3	5	111590	160000	1	1	1
2022	765	1	1	0	1	1	0	1	4	5	4	5	5	5	0.208119	0	38	1	15	3	5	96060	201400	1	0	1
2020	766	1	0	0	1	0	0	1	3	2	5	5	3	2	0.0392863	0	51	1	0	5	4	79900	266200	1	1	1
2022	766	1	0	0	1	0	0	1	2	1	5	3	2	2	0.0277151	0	53	1	0	3	4	94860	239000	1	0	0
2020	767	1	1	1	1	1	0	1	2	5	5	5	5	5	0.303327	1	26	0	12	4	4	79900	266200	1	1	0
2022	767	1	1	1	1	1	1	1	2	5	5	5	5	5	0.408727	0	28	0	13	3	4	94860	239000	1	0	1
2020	768	1	0	1	1	1	0	1	4	3	4	4	5	5	0.194682	0	31	1	11	3	4	34570	60590	1	0	0
2022	768	1	0	1	1	1	0	1	3	1	5	5	4	4	0.182245	0	33	1	11	3	4	75740	63500	0	0	0
2020	769	1	1	1	1	1	0	1	1	5	4	5	5	5	0.295591	0	18	0	12	1	4	148620	100000	1	0	0
2022	769	1	1	0	1	1	1	1	7	5	5	5	5	5	0.332297	0	20	0	15	2	4	183800	100600	1	0	1
2020	770	1	1	0	1	0	1	1	6	5	5	5	5	5	0.29094	0	35	1	16	3	5	100000	512600	0	0	0
2022	770	1	1	0	1	1	1	1	6	5	5	5	5	5	0.326776	0	37	1	16	3	5	120000	208500	0	0	1
2020	771	1	1	1	1	0	0	1	2	3	3	5	4	5	0.25536	1	27	1	12	3	2	132620	200000	0	0	1
2022	771	1	0	0	1	0	0	1	2	5	5	5	5	5	0.0524477	1	29	1	12	3	5	69000	205200	0	0	1
2020	772	1	1	0	1	0	1	1	1	3	3	2	4	2	0.243111	1	40	1	9	3	5	127500	125950	1	0	1
2022	772	1	1	0	0	0	1	1	1	5	3	5	4	2	0.242814	0	42	1	9	3	5	416000	160000	1	0	1
2020	773	1	0	0	1	0	0	1	2	2	3	5	3	1	0.0272686	0	54	1	9	3	3	107800	254000	0	0	1
2022	773	1	0	1	1	0	0	1	2	1	2	5	5	1	0.129915	0	56	1	9	3	5	100000	150000	0	0	1
2020	774	1	0	0	0	1	0	1	4	3	3	4	3	1	0.0684044	0	58	1	6	3	2	175000	200000	0	0	1
2022	774	1	0	0	1	1	0	1	1	4	3	3	3	4	0.0683447	0	60	1	6	4	3	105330	50000	0	0	1
2020	775	1	1	0	0	0	1	1	1	5	5	5	5	4	0.253248	1	29	0	16	3	3	102500	337000	1	0	0
2022	775	1	1	0	1	1	1	1	3	5	5	5	5	5	0.310215	1	31	1	16	4	3	452420	450000	1	0	0
2020	776	1	1	0	1	1	1	1	5	5	5	5	5	5	0.321256	1	27	0	15	1	4	97260	121000	0	0	1
2022	776	1	1	1	1	1	1	1	2	5	5	5	5	5	0.408727	1	29	1	15	1	1	162460	100000	0	0	0
2020	777	1	0	0	1	0	0	1	1	5	1	5	4	4	0.0341271	0	45	1	9	3	3	30630	61060	0	0	1
2022	777	1	0	0	1	0	0	1	1	3	5	5	5	4	0.0390338	1	47	1	9	3	3	47173	122880	0	0	1
2020	778	1	0	1	0	1	0	1	1	4	3	4	4	4	0.166859	0	54	1	9	3	3	142680	55900	1	0	0
2022	778	1	0	0	1	1	0	1	2	5	5	5	5	5	0.0882846	0	56	1	9	1	1	46320	30000	0	0	1
2020	779	1	1	0	1	1	0	1	4	5	5	5	5	5	0.210335	1	52	1	9	3	3	192800	285700	0	0	1
2022	779	1	0	0	1	0	0	1	3	3	4	5	5	5	0.0499249	0	54	1	6	4	3	150460	234000	0	0	1
2020	780	1	1	0	1	1	1	1	1	5	5	5	5	5	0.299174	1	25	0	15	2	3	192800	285700	0	0	0
2022	780	1	1	1	0	0	0	1	2	5	5	5	5	5	0.259467	1	27	0	16	3	3	150460	234000	0	0	1
2020	781	1	1	0	1	1	0	1	5	3	3	4	3	3	0.197089	0	17	0	10	3	5	15000	123770	1	0	0
2022	781	1	1	1	1	0	0	1	1	4	4	4	3	4	0.250399	0	19	0	13	3	5	42500	88140	1	0	1
2020	782	1	0	0	1	1	0	1	7	4	4	5	4	4	0.10682	1	32	1	12	3	5	324320	179500	0	0	1
2022	782	1	0	0	1	1	0	1	4	5	4	4	4	4	0.0925397	0	34	1	12	1	5	162200	900000	0	0	1
2020	783	1	0	0	0	1	0	1	2	5	5	5	5	5	0.0802617	0	32	1	16	3	6	175000	517050	1	0	1
2022	783	1	1	0	1	1	0	1	3	5	4	3	4	5	0.199462	1	34	1	16	2	7	287020	538000	0	0	1
2020	784	1	0	0	1	1	0	1	7	5	3	5	5	5	0.111455	0	36	1	9	4	6	205400	400000	0	0	0
2022	784	1	1	0	1	1	1	1	6	4	4	5	5	5	0.321647	0	38	1	9	4	6	142900	1000000	0	0	1
2020	785	1	0	1	1	0	0	1	4	5	3	5	3	5	0.159347	0	34	1	6	3	5	47464	119000	1	0	0
2022	785	1	0	0	1	0	0	1	1	3	3	5	3	4	0.0308596	0	36	1	9	3	5	40840	70908	1	0	1
2020	786	1	0	0	1	1	0	1	2	5	5	5	1	5	0.0807991	0	41	1	9	2	3	95524	130000	0	0	0
2022	786	1	0	0	1	1	0	1	1	1	5	5	5	5	0.071109	0	43	1	9	3	3	28060	121000	0	0	0
2020	787	1	0	0	1	0	0	1	4	5	3	5	4	5	0.0571858	0	32	0	9	3	1	69980	60000	0	0	0
2022	787	1	0	1	1	0	0	1	2	5	4	5	3	4	0.148456	0	34	0	9	1	1	59100	77000	0	0	0
2020	788	1	0	0	1	1	0	1	2	4	4	5	5	5	0.0831551	0	44	0	9	2	1	36650	90000	0	1	0
2022	788	1	0	0	1	1	0	1	2	3	4	4	5	5	0.0796085	0	46	0	9	3	1	60980	90000	0	1	1
2020	789	1	1	1	1	1	0	1	2	5	5	5	5	5	0.303327	1	28	1	16	3	1	31100	71000	0	1	0
2022	789	1	1	0	1	1	1	1	2	5	5	5	5	5	0.304695	0	30	1	16	3	3	154360	130000	0	1	1
2020	790	1	1	1	1	1	1	1	5	4	3	4	4	4	0.413373	1	34	1	12	2	7	67952	110000	1	0	1
2022	790	1	1	0	1	0	1	1	2	5	4	5	4	5	0.264771	0	36	1	12	3	7	109340	200000	1	0	1
2020	791	1	0	0	1	1	0	1	3	3	4	4	4	3	0.0791258	0	30	1	12	3	7	67952	110000	1	0	1
2022	791	1	0	0	1	1	0	1	3	5	5	5	4	5	0.0919337	0	32	1	12	3	7	109340	200000	1	0	1
2020	792	1	0	0	1	1	0	1	5	3	4	5	3	4	0.090994	0	34	1	9	3	6	107520	483800	0	0	0
2022	792	1	0	0	1	1	1	1	4	2	4	5	4	3	0.187766	0	36	1	9	4	6	155172	140900	0	0	1
2020	793	1	1	1	1	1	0	1	1	2	3	4	3	4	0.278192	0	35	1	12	3	6	107520	483800	0	0	1
2022	793	1	1	1	1	1	0	1	2	3	4	4	3	4	0.288842	0	37	1	12	3	6	155172	140900	0	0	1
2020	794	1	0	0	1	1	0	1	4	5	4	5	5	5	0.0971098	0	33	1	12	3	6	123040	210000	1	0	0
2022	794	1	0	0	1	1	0	1	7	5	3	5	5	5	0.111455	0	35	1	12	3	6	817820	300000	1	0	1
2020	795	1	1	1	1	1	1	1	6	4	2	5	4	4	0.417311	0	30	1	16	3	3	194700	260000	0	0	1
2022	795	1	1	1	1	1	1	1	7	5	5	5	5	5	0.43633	1	32	1	16	3	5	219040	350350	1	1	1
2020	796	1	0	0	1	1	1	1	1	3	2	5	2	5	0.170076	0	55	1	0	3	2	15300	40000	1	0	1
2022	796	1	0	0	1	1	0	1	1	5	3	5	3	5	0.07459	0	57	1	0	3	2	37020	45000	1	0	1
2020	797	1	1	0	1	1	1	1	1	4	1	5	4	5	0.285526	0	37	1	12	3	4	243000	100000	1	0	1
2022	797	1	1	0	1	1	1	1	1	5	5	5	5	3	0.295042	0	39	1	12	2	4	135780	150000	1	0	1
2020	798	1	0	0	1	1	0	1	2	1	1	1	1	1	0.0494862	0	35	1	9	2	4	243000	100000	1	0	1
2022	798	1	0	0	0	1	0	1	3	2	5	5	2	2	0.0652289	0	37	1	9	1	4	135780	150000	1	0	1
2020	799	1	1	0	1	0	1	1	6	4	1	1	2	2	0.26482	1	41	1	16	3	6	151800	152900	1	0	1
2022	799	1	1	0	1	1	1	1	5	4	3	3	3	3	0.30477	1	43	1	16	4	6	136400	180000	1	0	1
2020	800	1	1	0	1	1	0	1	4	3	2	4	3	4	0.191419	0	37	1	16	3	6	151800	152900	1	0	1
2022	800	1	1	0	1	1	1	1	3	4	3	4	4	5	0.300366	1	39	1	16	4	6	136400	180000	1	0	1
2020	801	1	0	1	1	0	0	1	2	3	5	5	3	3	0.142778	0	29	1	9	4	4	160600	250000	0	0	1
2022	801	1	1	1	1	1	0	1	1	2	3	5	2	3	0.274888	1	31	1	9	4	4	272500	461500	0	0	1
2020	802	1	0	0	1	1	0	1	1	4	4	5	4	5	0.0757633	0	39	1	9	3	6	51930	140000	0	0	0
2022	802	1	0	0	1	1	0	1	1	5	5	5	5	5	0.0827642	1	41	1	9	4	6	90400	200000	1	0	0
2020	803	1	0	0	0	1	0	1	1	3	3	5	3	4	0.0586736	0	42	1	9	3	6	397640	62400	0	0	0
2022	803	1	0	0	1	1	0	1	1	4	4	4	5	5	0.0770019	0	44	1	9	3	6	253580	150000	0	1	1
2020	804	1	0	0	1	1	0	1	5	5	5	5	1	4	0.0952945	0	52	1	9	3	4	50000	130000	0	0	0
2022	804	1	1	0	1	1	0	1	2	5	5	4	4	5	0.19679	0	54	1	9	3	10	242800	300000	0	0	0
2020	805	1	0	0	0	1	0	1	2	5	1	5	2	5	0.0657847	0	44	1	6	4	4	37500	200000	0	0	1
2022	805	1	1	0	1	1	1	1	3	5	3	5	5	5	0.305784	0	46	1	9	3	4	70000	150000	0	0	1
2020	806	1	0	1	1	0	1	1	2	5	3	5	5	5	0.257449	0	27	0	9	3	1	58180	100000	0	0	0
2022	806	1	0	0	1	0	0	1	1	2	4	5	5	3	0.0318384	0	29	0	9	2	1	124060	100000	0	0	0
2020	807	1	0	0	1	1	0	1	3	4	4	5	2	5	0.0830614	0	29	1	9	3	7	120000	255000	0	0	0
2022	807	1	0	0	1	1	0	1	4	5	5	5	5	5	0.0993255	0	31	1	9	3	6	156600	200000	1	0	0
2020	808	1	0	0	1	1	0	1	4	3	5	5	3	5	0.0897551	1	42	1	12	3	4	277240	182400	0	0	1
2022	808	1	1	0	1	1	1	1	4	4	5	5	5	4	0.310756	0	44	1	12	3	4	238759	180175	0	0	0
2020	809	1	0	0	1	0	0	1	1	2	3	4	3	3	0.0252471	0	44	1	12	3	4	277240	182400	0	0	0
2022	809	1	1	0	1	0	0	1	1	3	3	3	3	3	0.138538	1	46	1	12	3	4	238759	180175	0	0	0
2020	810	1	0	0	0	1	0	1	1	5	2	4	4	4	0.063524	0	37	1	9	3	5	123613	153650	1	0	1
2022	810	1	0	0	1	1	0	1	1	2	2	5	4	4	0.0634384	0	39	1	9	3	6	113920	138100	1	0	0
2020	811	1	1	0	1	1	0	1	6	4	4	5	4	5	0.214375	0	33	1	9	4	5	75000	175000	0	0	0
2022	811	1	1	0	1	1	0	1	5	4	4	5	4	4	0.206789	0	35	1	9	3	4	128500	144000	0	0	0
2020	812	1	1	0	0	1	0	1	4	5	2	4	4	4	0.191095	1	28	1	12	3	4	99080	60000	0	0	0
2022	812	1	0	0	1	1	0	1	1	4	2	5	4	5	0.0713319	0	30	1	15	3	4	66060	80000	0	0	0
2020	813	1	0	0	1	0	0	1	1	3	3	4	3	4	0.0302268	0	35	1	9	3	5	148340	100000	1	0	1
2022	813	1	0	0	0	0	0	1	1	3	3	4	2	2	0.0162007	0	37	1	6	3	5	148840	150000	1	0	0
2020	814	1	0	0	1	1	0	1	4	2	4	5	5	5	0.0883684	0	37	1	9	3	5	148340	100000	1	0	1
2022	814	1	0	0	1	1	0	1	3	5	5	5	5	5	0.093805	0	39	1	9	3	5	148840	150000	1	0	1
2020	815	1	0	0	1	1	1	1	6	5	2	3	5	5	0.207854	0	34	0	9	3	5	44550	104400	1	0	1
2022	815	1	0	0	1	1	0	1	4	5	5	5	5	5	0.0993255	0	36	0	9	3	4	71460	83600	1	0	1
2020	816	1	0	0	1	0	0	1	1	3	3	4	5	4	0.0339696	0	51	1	8	2	5	40000	103200	1	0	0
2022	816	1	0	0	1	0	0	1	1	2	2	4	2	5	0.0252918	1	53	1	6	2	5	94510	250000	1	0	0
2020	817	1	1	0	0	0	0	1	1	3	2	5	4	3	0.131436	0	20	0	12	2	5	40000	103200	1	0	0
2022	817	1	1	1	0	1	1	1	1	3	3	3	4	3	0.377656	0	22	0	14	2	5	94510	250000	1	0	0
2020	818	1	0	0	1	1	0	1	4	5	5	5	5	5	0.0993255	0	58	0	6	3	1	29200	30700	0	0	0
2022	818	1	0	0	1	1	0	1	1	5	3	5	3	5	0.07459	0	60	0	6	3	1	22720	13500	0	0	0
2020	819	1	0	0	1	0	0	1	5	1	3	5	5	3	0.0487906	0	33	1	9	2	6	194160	70700	0	0	1
2022	819	1	0	0	1	1	0	1	5	2	4	4	5	5	0.093256	0	35	1	9	3	5	97600	160000	0	0	1
2020	820	1	0	0	1	0	0	1	3	2	3	5	3	5	0.0410526	0	37	1	9	3	6	194160	70700	0	0	0
2022	820	1	0	0	1	0	0	1	3	1	1	3	2	1	0.0223068	0	39	1	9	3	5	97600	160000	0	0	1
2020	821	1	0	0	1	1	0	1	2	5	5	5	5	5	0.0882846	0	40	1	12	2	7	67400	111000	1	0	1
2022	821	1	0	0	1	1	0	1	3	3	3	5	4	5	0.0816747	0	42	1	12	2	7	83300	129800	1	0	1
2020	822	1	0	0	1	1	0	1	2	5	3	5	5	4	0.0817873	1	34	1	9	3	5	86800	100900	0	0	0
2022	822	1	0	0	1	1	0	1	4	5	5	5	4	4	0.0953882	1	36	1	9	3	5	81286	120800	0	0	0
2020	823	1	0	1	1	1	0	1	2	4	3	3	3	3	0.175832	0	40	1	6	2	4	45200	60000	0	0	1
2022	823	1	0	1	1	1	0	1	2	4	3	3	4	4	0.179769	0	42	1	6	3	5	44212	32590	1	0	1
2020	824	1	0	1	1	0	0	1	2	3	3	5	3	2	0.136281	0	41	1	8	2	4	45200	60000	0	0	1
2022	824	1	0	0	1	0	1	1	2	4	3	5	5	5	0.150503	0	43	1	8	2	5	44212	32590	1	0	1
2020	825	1	0	0	1	1	0	1	2	5	5	5	5	5	0.0882846	0	31	1	9	1	11	104010	75000	0	0	0
2022	825	1	0	0	1	1	0	1	2	3	3	5	4	5	0.0761542	0	33	1	9	1	11	214700	100000	0	0	1
2020	826	1	0	0	1	0	0	1	5	5	4	5	5	5	0.0667933	0	30	1	6	4	3	66060	50000	0	0	0
2022	826	1	0	0	0	1	0	1	3	5	4	5	4	4	0.0796291	0	32	1	6	5	5	83100	80000	1	0	0
2020	827	1	1	1	1	1	0	1	3	4	5	3	5	4	0.302602	1	24	0	15	3	3	15250	127500	1	0	0
2022	827	1	1	1	1	1	1	1	3	5	5	5	5	5	0.414248	1	26	0	15	3	4	189520	272500	1	1	1
2020	828	1	0	1	1	1	1	1	5	3	3	5	4	3	0.298017	0	18	0	14	3	5	27100	30000	1	0	0
2022	828	1	0	1	1	1	0	1	6	5	3	5	5	3	0.205836	0	20	0	14	2	5	8000	45300	1	0	0
2020	829	1	0	0	0	0	0	1	2	5	5	5	4	2	0.0363557	0	52	1	9	3	3	260660	68000	1	0	1
2022	829	1	0	0	1	0	0	1	3	3	5	5	4	1	0.0420056	0	54	1	9	3	3	31180	48000	0	0	1
2020	830	1	0	0	1	0	0	1	4	1	5	5	5	5	0.0518334	0	39	1	9	2	7	50500	50000	1	0	1
2022	830	1	0	0	1	1	0	1	3	2	4	4	4	4	0.0782779	1	41	1	6	2	6	67540	100000	1	1	1
2020	831	1	1	0	1	1	0	1	4	5	3	5	5	5	0.205904	0	34	1	9	3	4	141220	130000	0	1	0
2022	831	1	1	0	1	1	1	1	1	5	3	5	4	5	0.292871	0	36	1	9	2	4	90040	170000	0	0	0
2020	832	1	0	0	1	0	0	1	1	1	1	5	1	5	0.0189238	0	49	1	12	1	1	48364	70000	0	0	0
2022	832	1	0	0	1	0	0	1	1	1	3	5	4	1	0.0207057	0	51	1	12	2	1	8340	70000	0	0	0
2020	833	1	1	0	1	1	0	1	3	5	3	5	5	3	0.196251	0	44	1	12	2	4	80492	84310	1	0	1
2022	833	1	1	0	1	1	0	1	2	5	3	5	5	3	0.190731	0	46	1	12	4	4	120740	92000	1	0	1
2020	834	1	0	0	1	1	1	1	3	5	3	5	3	5	0.191031	0	47	1	6	4	7	171700	210000	1	0	1
2022	834	1	0	1	0	1	0	1	2	5	3	5	5	5	0.179863	0	49	1	6	4	6	107060	150000	0	0	1
2020	835	1	0	0	0	1	0	1	3	5	3	5	3	5	0.0776079	0	46	1	0	5	7	171700	210000	1	0	1
2022	835	1	0	0	1	0	0	1	5	5	5	5	5	5	0.069009	1	48	1	0	5	6	107060	150000	0	0	1
2020	836	1	0	0	1	0	0	1	4	3	3	5	3	1	0.0412232	0	58	1	6	3	5	31920	75000	1	0	1
2022	836	1	0	0	1	0	0	1	1	1	1	5	1	5	0.0189238	0	60	1	6	5	6	36820	80300	0	0	1
2020	837	1	0	0	1	1	0	1	2	5	4	5	5	5	0.0860689	0	36	1	9	4	7	323060	60000	1	0	0
2022	837	1	0	0	1	0	0	1	1	3	5	5	5	5	0.0410997	0	38	1	9	4	1	45620	60000	0	0	0
2020	838	1	0	0	0	1	1	1	4	3	2	5	4	5	0.182357	0	17	0	13	1	7	323060	60000	1	0	0
2022	838	1	1	0	0	1	0	1	6	5	5	5	5	2	0.207155	0	19	0	13	5	6	62940	120000	1	0	0
2020	839	1	0	0	0	1	0	1	1	3	5	5	4	5	0.0670423	0	50	1	0	1	4	46540	73020	0	0	1
2022	839	1	0	0	1	1	0	1	1	1	5	5	4	5	0.0692377	0	52	1	0	1	4	78120	121800	0	0	1
2020	840	1	0	1	1	1	0	1	5	3	3	4	3	4	0.192178	0	17	0	9	2	4	46540	73020	0	0	0
2022	840	1	0	0	1	1	0	1	4	2	4	5	2	4	0.0806884	0	19	0	9	2	4	78120	121800	0	0	0
2020	841	1	1	1	1	1	1	1	4	5	5	5	4	4	0.415831	0	37	1	9	3	4	53060	46200	0	0	1
2022	841	1	1	1	1	1	0	1	3	5	3	4	3	3	0.295909	1	39	1	9	3	6	97680	81170	0	0	1
2020	842	1	1	0	1	1	1	1	4	4	5	5	5	5	0.312822	1	24	0	16	3	5	86940	75000	1	1	1
2022	842	1	1	0	1	1	0	1	5	5	3	5	4	5	0.209553	1	26	0	16	2	1	60340	120000	0	1	0
2020	843	1	0	0	1	0	0	1	3	3	4	4	3	2	0.0393516	0	55	1	8	4	3	65620	30000	1	0	1
2022	843	1	0	0	1	0	0	1	4	3	3	4	2	3	0.0428508	0	57	1	8	3	4	34460	40000	1	0	1
2020	844	1	1	1	1	1	0	1	4	5	5	5	5	4	0.312302	0	31	1	15	2	4	48320	31200	0	0	1
2022	844	1	0	1	1	1	0	1	2	5	4	5	3	4	0.184293	0	33	1	15	2	5	44790	96000	0	0	1
2020	845	1	0	0	1	0	0	1	4	4	3	5	2	2	0.0443315	1	55	1	9	3	8	212040	202300	1	0	0
2022	845	1	0	0	1	1	0	1	2	2	4	4	2	2	0.0648829	0	57	1	9	2	3	28928	177100	0	0	0
2020	846	1	0	0	1	1	0	1	6	5	5	5	5	5	0.110366	0	44	1	9	5	3	10000	41350	1	0	1
2022	846	1	0	0	0	0	0	1	6	1	1	5	5	1	0.0377249	0	46	1	9	5	3	16704	31960	1	0	1
2020	847	1	0	0	1	0	1	1	6	3	3	4	4	2	0.160969	0	38	0	9	3	8	75000	62100	0	0	0
2022	847	1	0	0	1	1	0	1	3	5	5	5	5	5	0.093805	0	40	0	9	1	9	173000	78400	1	0	0
2020	848	1	0	1	1	1	0	1	5	5	2	4	5	5	0.201599	0	32	1	9	3	8	75000	62100	0	0	0
2022	848	1	1	0	1	1	0	1	7	5	2	5	5	5	0.220249	1	34	1	9	3	9	173000	78400	1	0	0
2020	849	1	1	1	1	1	0	1	4	4	4	4	3	5	0.304863	0	38	1	9	4	7	99020	110000	1	0	0
2022	849	1	1	1	1	1	1	1	4	3	4	5	2	5	0.406111	1	40	1	9	3	7	103620	84600	1	0	0
2020	850	1	0	0	0	0	0	1	1	5	5	5	5	5	0.0389043	0	50	1	9	3	2	132320	23000	1	0	1
2022	850	1	0	0	0	1	0	1	1	5	5	5	5	5	0.0747413	0	52	1	9	2	4	70000	48000	1	0	1
2020	851	1	0	0	0	0	0	1	2	2	3	4	4	4	0.0266819	0	47	1	9	3	3	46580	46780	1	0	1
2022	851	1	0	0	1	0	0	1	2	4	3	5	4	3	0.0390993	1	49	1	9	3	3	42790	56050	1	0	1
2020	852	1	0	0	1	0	0	1	2	3	3	4	3	2	0.0316154	0	48	1	9	3	3	46580	46780	1	0	0
2022	852	1	0	0	1	0	0	1	2	2	3	4	2	3	0.0288962	0	50	1	9	3	3	42790	56050	1	0	1
2020	853	1	0	0	1	1	0	1	4	5	5	5	5	5	0.0993255	0	47	1	6	3	4	32820	67300	1	0	1
2022	853	1	0	0	1	1	0	1	2	3	4	5	4	5	0.0783699	0	49	1	6	3	4	80000	40000	1	0	1
2020	854	1	0	0	1	1	0	1	2	5	4	5	5	5	0.0860689	0	49	1	9	3	4	32820	67300	1	0	0
2022	854	1	0	0	1	1	0	1	2	5	5	5	5	5	0.0882846	0	51	1	9	1	4	80000	40000	1	0	1
2020	855	1	1	0	1	1	0	1	4	4	3	4	3	5	0.198614	0	23	0	9	3	1	45200	50000	0	0	0
2022	855	1	1	0	1	1	0	1	3	3	2	5	4	5	0.190469	0	25	0	12	3	1	48000	52400	0	0	0
2020	856	1	0	1	1	0	0	1	1	3	4	1	3	1	0.128379	0	16	0	8	4	4	32820	67300	1	0	0
2022	856	1	0	1	1	0	1	1	3	5	5	5	2	4	0.259721	0	18	0	10	5	4	80000	40000	1	0	0
2020	857	1	0	0	1	1	0	1	4	4	4	5	5	5	0.094196	0	34	1	9	2	4	102850	66020	1	1	0
2022	857	1	0	0	1	1	0	1	5	5	5	5	4	5	0.102974	0	36	1	9	2	4	140220	300000	1	0	0
2020	858	1	0	0	1	0	0	1	7	4	3	4	4	2	0.0640028	0	55	1	12	4	5	118470	104940	1	0	1
2022	858	1	0	0	1	0	0	1	6	3	5	5	5	3	0.0645701	0	57	1	12	3	4	326800	36000	1	0	1
2020	859	1	1	0	1	1	1	1	2	3	3	4	3	2	0.283862	1	31	1	16	3	4	391480	193000	0	0	0
2022	859	1	1	0	1	1	0	1	4	5	4	4	4	4	0.203549	1	33	1	16	3	4	147580	180000	0	0	0
2020	860	1	1	0	1	1	1	1	5	5	5	5	5	3	0.317124	0	30	1	16	3	3	186440	100000	0	0	0
2022	860	1	1	0	1	1	1	1	1	5	5	5	5	5	0.299174	1	32	1	16	3	3	223972	100000	0	0	0
2020	861	1	0	0	1	0	0	1	2	3	2	5	4	3	0.0339698	0	56	1	12	3	3	28060	40000	1	0	1
2022	861	1	0	0	1	1	0	1	4	1	4	3	3	4	0.0783803	0	58	1	12	2	3	31520	40000	1	0	1
2020	862	1	0	0	1	1	0	1	1	5	5	5	5	1	0.0745006	0	45	1	9	3	2	12900	60500	1	0	1
2022	862	1	0	0	1	0	0	1	1	5	5	5	5	3	0.0427955	1	47	1	9	3	2	46980	43000	1	0	1
2020	863	1	0	0	0	1	0	1	1	1	2	3	3	3	0.0472988	0	42	1	12	2	5	32760	37500	1	0	0
2022	863	1	0	0	0	0	0	1	2	5	5	5	5	5	0.0444248	0	44	1	12	3	5	42740	35000	1	0	1
2020	864	1	1	0	1	1	1	1	4	4	3	3	5	4	0.305059	0	38	1	12	2	7	42740	64150	1	0	1
2022	864	1	1	1	1	0	1	1	2	4	3	3	4	3	0.358276	0	40	1	12	3	7	88212	170000	1	0	1
2020	865	1	0	0	1	1	0	1	3	2	4	4	3	4	0.0764065	0	33	1	9	3	4	48000	94700	1	1	1
2022	865	1	0	0	1	1	0	1	7	3	4	4	4	4	0.103273	0	35	1	9	3	4	64420	107700	1	1	1
2020	866	1	0	0	1	1	0	1	2	1	1	3	3	3	0.0586264	0	34	1	9	3	4	48000	94700	1	1	1
2022	866	1	0	0	1	1	0	1	1	3	2	3	3	3	0.0611493	1	36	1	9	4	4	64420	107700	1	1	1
2020	867	1	0	0	1	1	0	1	2	1	3	4	2	2	0.0597534	0	54	1	9	2	2	18400	9000	1	0	1
2022	867	1	0	0	1	1	0	1	2	3	3	5	4	4	0.0740883	0	56	1	9	3	2	17328	30160	1	0	1
2020	868	1	1	0	0	1	1	1	4	5	3	5	5	5	0.303281	1	26	0	16	3	3	44200	47500	0	0	0
2022	868	1	1	0	0	1	1	1	4	3	3	4	5	3	0.292689	1	28	0	16	3	3	34554	61500	1	0	1
2020	869	1	1	1	1	0	0	1	3	5	5	5	5	5	0.273011	1	32	0	12	3	1	71000	150000	1	1	0
2022	869	1	1	0	1	1	0	1	4	4	3	4	3	4	0.196548	1	34	0	12	2	1	40820	120000	0	1	0
2020	870	1	1	0	1	0	1	1	4	5	4	5	4	4	0.273746	0	56	1	16	4	3	169744	166680	1	0	0
2022	870	1	1	0	1	1	1	1	4	5	4	5	5	5	0.31352	1	58	1	16	4	3	134848	147030	1	0	1
2020	871	1	0	0	1	0	0	1	1	5	5	5	5	5	0.0469273	0	42	1	9	4	4	49760	35000	1	0	0
2022	871	1	0	0	1	0	0	1	2	3	5	5	3	2	0.0366797	0	44	1	9	3	4	244300	60000	1	0	1
2020	872	1	0	0	1	1	1	1	2	3	3	5	4	2	0.175357	0	51	1	9	4	3	16040	104500	1	0	1
2022	872	1	0	0	1	0	1	1	1	3	4	5	5	3	0.140153	0	53	1	9	4	3	150800	121000	1	1	0
2020	873	1	0	0	1	1	0	1	4	4	5	5	5	4	0.0943458	0	31	1	9	2	4	30890	40000	1	0	0
2022	873	1	0	0	1	1	0	1	2	4	3	3	4	3	0.0736706	0	33	1	9	1	4	41540	100000	1	0	1
2020	874	1	1	0	0	0	1	1	1	5	3	5	5	4	0.248817	0	48	1	8	2	5	83840	40500	0	0	1
2022	874	1	1	0	1	1	0	1	1	3	3	5	5	3	0.179383	0	50	1	8	3	3	62710	72000	1	0	1
2020	875	1	0	0	1	1	0	1	4	3	3	5	3	4	0.0832578	0	47	1	6	3	5	83840	40500	0	0	1
2022	875	1	0	0	1	0	0	1	5	3	3	5	3	3	0.0508754	0	49	1	6	3	3	62710	72000	1	0	1
2020	876	1	0	0	1	1	0	1	2	5	4	5	5	5	0.0860689	0	38	1	9	4	4	368320	200400	1	0	1
2022	876	1	0	0	1	0	0	1	2	1	1	3	1	5	0.0231786	0	40	1	9	3	5	108920	250200	1	0	1
2020	877	1	0	0	0	1	0	1	5	4	1	5	5	5	0.0850464	0	45	1	9	3	4	88800	500000	1	0	0
2022	877	1	1	0	1	1	0	1	4	3	3	3	3	4	0.193002	0	47	1	9	3	3	112800	400000	1	0	0
2020	878	1	0	1	1	1	0	1	4	5	5	5	5	5	0.203358	0	45	1	9	3	4	88800	500000	1	0	1
2022	878	1	0	0	1	1	0	1	3	3	3	5	3	5	0.0798033	1	47	1	9	3	3	112800	400000	1	0	1
2020	879	1	0	0	0	0	0	1	4	1	2	4	3	3	0.028656	0	54	1	9	3	5	107900	80000	1	0	1
2022	879	1	0	0	1	0	0	1	3	2	3	4	3	2	0.0342221	1	56	1	9	3	6	89440	122200	1	0	1
2020	880	1	1	1	1	0	0	1	1	1	3	5	2	4	0.238203	0	27	1	12	3	5	107900	80000	1	0	1
2022	880	1	0	1	1	0	0	1	1	3	3	4	4	2	0.131999	1	29	1	12	3	6	89440	122200	1	0	1
2020	881	1	0	0	1	1	0	1	3	1	2	5	3	3	0.0676282	0	40	1	9	3	4	100160	91770	1	0	1
2022	881	1	0	0	1	0	0	1	1	1	2	4	3	3	0.0201176	0	42	1	9	3	4	117984	121012	1	0	1
2020	882	1	0	0	1	0	0	1	1	3	3	5	4	3	0.0306651	0	54	1	6	3	2	38160	90125	1	0	1
2022	882	1	0	0	1	1	0	1	2	5	5	5	5	5	0.0882846	0	56	1	6	2	2	55880	100120	1	0	1
2020	883	1	1	0	1	1	0	1	1	4	4	5	4	5	0.186773	0	51	1	9	3	2	38160	90125	1	0	1
2022	883	1	0	0	1	1	0	1	1	5	4	5	4	5	0.0786771	0	53	1	9	1	2	55880	100120	1	0	1
2020	884	1	0	1	1	1	0	1	2	3	3	4	2	3	0.17168	0	49	1	9	1	3	78250	40260	1	0	1
2022	884	1	0	1	1	1	0	1	1	1	5	4	4	4	0.170572	0	51	1	9	1	3	26050	30000	0	0	1
2020	885	1	0	1	1	1	0	1	4	3	3	5	4	5	0.191228	0	36	1	9	3	4	66970	60000	0	0	0
2022	885	1	0	1	1	1	0	1	3	3	3	4	4	4	0.183009	0	38	1	9	3	4	170740	80000	0	0	0
2020	886	1	0	0	1	1	0	1	5	4	3	5	4	5	0.0956293	0	43	1	9	3	4	66970	60000	0	0	0
2022	886	1	0	0	1	1	0	1	3	5	5	5	5	5	0.093805	0	45	1	9	4	4	170740	80000	0	0	0
2020	887	1	1	0	1	1	1	1	3	1	3	4	4	4	0.289558	0	38	1	12	3	8	105770	100000	1	1	0
2022	887	1	0	0	1	1	0	1	1	2	3	5	3	4	0.0637827	0	40	1	12	2	8	102460	100000	0	0	0
2020	888	1	0	0	0	1	0	1	2	1	3	5	4	5	0.0623037	0	36	1	12	3	8	105770	100000	1	1	0
2022	888	1	0	0	1	0	0	1	7	5	5	5	5	5	0.0800499	0	38	1	9	4	8	102460	100000	0	0	0
2020	889	1	0	0	1	1	0	1	2	5	3	3	5	5	0.0825875	0	30	1	12	3	8	92392	60320	1	0	0
2022	889	1	0	0	1	1	0	1	1	5	3	5	5	5	0.0783327	0	32	1	9	2	9	87250	83500	1	0	0
2020	890	1	0	0	0	1	1	1	6	5	5	5	5	2	0.201546	0	34	1	9	4	8	92392	60320	1	0	0
2022	890	1	0	0	1	1	1	1	7	5	5	5	5	5	0.221287	0	36	1	9	4	9	87250	83500	1	0	0
2020	891	1	0	1	1	1	0	1	2	3	5	3	5	5	0.185224	0	33	1	9	3	7	562620	192000	0	0	0
2022	891	1	0	1	1	1	0	1	1	4	5	2	4	3	0.175982	0	35	1	9	3	7	187320	180000	0	0	0
2020	892	1	0	0	0	0	0	1	1	5	5	5	1	5	0.0314188	0	45	1	9	3	3	34280	138000	1	0	0
2022	892	1	0	0	1	1	0	1	5	5	5	5	5	5	0.104846	0	47	1	6	3	3	11110	88390	1	0	0
2020	893	1	0	1	1	0	0	1	1	3	3	4	4	4	0.136131	0	19	0	9	2	3	34280	138000	1	0	0
2022	893	1	0	1	1	0	0	1	1	1	2	2	2	2	0.118947	0	21	0	9	2	3	11110	88390	1	0	1
2020	894	1	0	1	1	0	0	1	2	4	3	3	2	2	0.136058	0	45	1	9	3	5	53840	54000	1	0	0
2022	894	1	0	0	1	1	0	1	2	1	2	5	1	3	0.058365	0	47	1	9	3	5	48290	58220	1	0	0
2020	895	1	1	0	1	1	1	1	2	5	5	5	5	5	0.304695	1	30	1	16	3	3	46900	80000	0	0	0
2022	895	1	1	0	1	1	0	1	1	5	5	5	5	5	0.193774	0	32	1	16	4	2	79460	160000	0	0	0
2020	896	1	0	0	1	1	1	1	4	4	4	5	5	5	0.199596	0	39	1	12	3	5	20000	31000	1	0	1
2022	896	1	1	1	1	0	0	1	5	5	1	5	5	5	0.275189	1	41	1	9	3	5	101340	106400	1	0	0
2020	897	1	0	0	1	1	0	1	4	4	5	4	5	5	0.0957789	0	37	1	12	3	5	20000	31000	1	0	0
2022	897	1	1	0	1	1	1	1	3	3	4	5	4	5	0.3003	0	39	1	9	2	5	101340	106400	1	0	0
2020	898	1	0	1	1	0	0	1	2	3	5	5	5	5	0.150653	0	35	1	9	2	3	130440	100000	1	0	0
2022	898	1	0	0	1	1	0	1	2	3	3	5	5	5	0.0780256	0	37	1	9	3	3	182860	160000	0	0	0
2020	899	1	1	0	1	0	0	1	4	5	5	5	5	5	0.174498	0	35	1	9	3	3	130440	100000	1	0	0
2022	899	1	1	0	1	1	0	1	5	5	5	4	5	5	0.215223	0	37	1	9	3	3	182860	160000	0	0	0
2020	900	1	0	1	0	0	0	1	1	1	5	1	1	1	0.113002	0	39	1	12	3	10	230068	306200	1	0	0
2022	900	1	0	0	0	0	0	1	1	3	3	4	3	3	0.020138	0	41	1	9	3	9	70000	154700	1	0	0
2020	901	1	0	0	0	1	0	1	2	3	3	4	5	5	0.0693699	0	35	1	0	3	10	230068	306200	1	0	0
2022	901	1	0	0	0	1	0	1	3	3	2	4	3	3	0.0648	0	37	1	6	3	9	70000	154700	1	0	0
2020	902	1	0	1	1	0	0	1	2	3	3	5	4	1	0.136086	0	56	1	0	3	5	75000	124700	1	0	0
2022	902	1	0	0	1	1	0	1	1	3	3	4	3	3	0.0639978	0	58	1	0	3	6	39332	80000	1	0	0
2020	903	1	0	0	1	0	0	1	4	3	3	5	3	2	0.0432891	0	57	1	9	2	5	75000	124700	1	0	0
2022	903	1	0	0	1	1	0	1	5	3	5	2	3	1	0.0851135	0	59	1	9	3	6	39332	80000	1	0	1
2020	904	1	0	0	1	1	1	1	2	5	5	5	5	5	0.193685	0	28	1	12	1	5	75000	124700	1	0	0
2022	904	1	0	0	1	1	0	1	1	5	5	5	5	5	0.0827642	0	30	1	15	2	6	39332	80000	1	0	0
2020	905	1	0	1	1	1	0	1	2	3	4	3	4	4	0.179071	0	29	1	9	5	5	75000	124700	1	0	0
2022	905	1	0	1	1	1	0	1	2	2	2	4	3	3	0.168422	0	31	1	9	3	6	39332	80000	1	0	0
2020	906	1	0	0	1	1	0	1	5	5	4	5	5	5	0.10263	0	32	1	9	3	6	20000	70446	1	0	0
2022	906	1	0	0	0	1	0	1	1	4	3	5	4	4	0.0634588	0	34	1	9	3	6	82152	223440	1	0	0
2020	907	1	0	0	1	0	0	1	3	1	3	5	3	2	0.0319411	0	57	1	9	3	2	70640	30000	1	0	1
2022	907	1	0	0	1	1	0	1	6	1	3	1	2	3	0.0820026	0	59	1	9	3	6	159800	357300	1	0	1
2020	908	1	1	0	1	1	0	1	6	5	5	5	5	5	0.221376	0	30	1	9	5	4	44200	223000	0	0	0
2022	908	1	0	0	1	1	0	1	4	5	5	5	5	5	0.0993255	0	32	1	9	4	6	159800	357300	1	0	0
2020	909	1	1	1	1	1	1	1	3	5	5	5	5	5	0.414248	0	32	1	12	4	3	73165	104400	1	0	1
2022	909	1	1	0	1	1	0	1	3	2	3	5	4	4	0.187705	0	34	1	12	4	4	20254	55000	0	0	0
2020	910	1	0	0	0	0	1	1	2	5	4	5	5	3	0.143478	0	32	1	9	4	3	17980	61000	0	0	1
2022	910	1	0	0	1	1	1	1	1	5	3	4	5	3	0.178969	0	34	1	6	4	4	20254	55000	0	0	1
2020	911	1	0	0	1	0	1	1	1	4	4	3	5	3	0.141801	0	56	1	9	4	3	42780	36000	1	0	0
2022	911	1	0	0	1	1	0	1	1	2	3	4	3	2	0.0590181	0	58	1	9	3	3	28740	61978	1	0	1
2020	912	1	0	0	1	1	0	1	2	2	3	5	4	3	0.0691086	0	48	1	9	3	3	50000	107400	1	0	0
2022	912	1	0	0	1	1	0	1	3	3	3	4	4	3	0.07691	0	50	1	9	3	3	15660	40000	1	0	1
2020	913	1	0	0	1	0	0	1	2	1	1	5	5	3	0.0277979	0	34	1	9	3	3	47640	102700	1	0	0
2022	913	1	0	0	1	0	0	1	1	4	2	5	4	3	0.0313632	1	36	1	6	4	3	25000	100000	1	0	0
2020	914	1	0	0	1	1	0	1	1	1	1	5	5	5	0.0622462	0	33	1	6	5	3	47640	102700	1	0	0
2022	914	1	0	0	1	1	1	1	2	1	1	5	1	5	0.165682	0	35	1	6	3	3	25000	100000	1	0	0
2020	915	1	0	0	1	0	0	1	1	5	5	5	5	5	0.0469273	0	53	0	6	2	3	16452	20000	1	0	0
2022	915	1	0	0	1	0	0	1	1	5	5	5	5	5	0.0469273	0	55	0	6	3	4	28100	44200	1	0	0
2020	916	1	0	0	1	1	1	1	4	5	5	4	5	5	0.204093	0	21	0	14	3	3	16452	20000	1	0	0
2022	916	1	0	0	1	1	0	1	3	4	4	5	4	5	0.0868042	1	23	0	15	3	4	28100	44200	1	0	0
2020	917	1	0	0	1	0	0	1	5	5	5	4	4	5	0.0665048	1	37	1	9	3	10	172504	300000	1	0	0
2022	917	1	0	1	1	1	0	1	7	5	5	5	5	5	0.219919	0	39	1	9	3	10	253740	279700	1	0	0
2020	918	1	0	0	1	1	0	1	6	5	5	5	5	5	0.110366	0	34	1	9	4	10	172504	300000	1	0	0
2022	918	1	1	0	1	1	1	1	3	5	4	5	5	5	0.307999	0	36	1	9	3	10	253740	279700	1	0	0
2020	919	1	0	0	1	1	0	1	6	5	5	5	5	4	0.1083	0	34	1	12	3	10	172504	300000	1	0	0
2022	919	1	0	0	1	1	0	1	4	5	3	4	5	5	0.0942612	1	36	1	12	4	10	253740	279700	1	0	0
2020	920	1	0	0	1	0	0	1	2	4	4	4	3	4	0.0408767	0	34	1	9	4	4	34090	95000	0	0	0
2022	920	1	0	0	1	1	0	1	3	3	3	4	4	4	0.0789759	0	36	1	6	3	4	61498	165500	1	0	0
2020	921	1	0	0	1	1	0	1	5	4	4	3	4	4	0.0945135	0	37	1	9	3	4	34090	95000	0	0	1
2022	921	1	0	1	1	1	1	1	4	3	3	5	5	5	0.2985	0	39	1	9	4	4	61498	165500	1	0	1
2020	922	1	0	0	1	1	0	1	6	5	3	5	3	3	0.0980603	0	46	1	9	3	3	101740	110800	1	0	0
2022	922	1	0	0	1	0	0	1	7	4	3	5	4	5	0.0708333	0	48	1	9	3	3	83320	150000	1	0	0
2020	923	1	0	1	1	0	0	1	2	3	3	4	3	4	0.13978	0	42	1	9	4	3	101740	110800	1	0	0
2022	923	1	0	0	1	1	1	1	1	4	4	5	5	5	0.183035	0	44	1	9	3	3	83320	150000	1	0	0
2020	924	1	0	0	0	0	0	1	1	5	5	5	5	5	0.0389043	0	52	1	0	5	6	54160	220600	1	0	0
2022	924	1	0	0	1	0	0	1	1	1	1	5	5	1	0.0181457	0	54	1	4	4	6	189200	85800	1	0	0
2020	925	1	0	0	1	1	0	1	3	2	3	4	4	4	0.0760622	0	28	1	15	3	6	54160	220600	1	0	0
2022	925	1	0	0	1	1	0	1	3	5	4	5	5	5	0.0915893	0	30	1	15	1	6	189200	85800	1	0	0
2020	926	1	0	0	1	1	0	1	2	3	4	4	5	4	0.0775426	0	21	0	12	2	6	54160	220600	1	0	0
2022	926	1	0	0	1	1	0	1	2	3	4	4	4	4	0.0756712	0	23	0	12	3	6	189200	85800	1	0	0
2020	927	1	0	0	1	1	1	1	2	3	3	5	5	3	0.179294	0	43	1	9	3	3	78120	60400	1	0	1
2022	927	1	0	0	0	1	0	1	1	3	3	4	5	5	0.0638494	0	45	1	9	3	4	71240	42000	1	0	0
2020	928	1	0	0	1	0	0	1	4	5	5	5	5	5	0.0634886	0	37	1	9	5	4	139440	250000	0	0	0
2022	928	1	0	0	0	0	0	1	3	5	3	5	3	3	0.0376392	0	39	1	9	3	4	187280	155560	1	0	0
2020	929	1	0	0	1	1	1	1	4	5	3	5	5	3	0.196163	0	37	1	6	1	4	139440	250000	0	0	0
2022	929	1	0	0	1	0	1	1	3	5	5	5	4	5	0.161497	0	39	1	6	3	4	187280	155560	1	0	0
2020	930	1	0	0	0	1	0	1	4	1	1	2	1	1	0.053137	0	45	0	12	3	4	20792	70200	1	0	0
2022	930	1	0	0	1	1	0	1	5	5	1	3	3	3	0.0868428	0	47	1	12	3	4	238550	47800	1	0	0
2020	931	1	0	0	1	0	0	1	7	5	5	5	5	5	0.0800499	0	45	1	9	5	3	88320	60000	1	0	0
2022	931	1	0	0	1	1	0	1	6	5	5	5	5	5	0.110366	0	47	1	9	4	3	148300	30000	1	0	0
2020	932	1	0	0	1	1	0	1	2	1	3	4	3	3	0.0636907	0	32	1	9	2	4	92700	60000	0	0	0
2022	932	1	0	1	1	1	1	1	2	2	3	4	4	4	0.279975	1	34	1	9	3	6	229044	140000	0	0	0
2020	933	1	0	0	1	1	1	1	4	5	3	5	5	5	0.200294	0	32	1	9	3	4	92700	60000	0	0	0
2022	933	1	0	0	1	0	0	1	3	5	5	5	5	5	0.0579681	1	34	1	9	4	6	229044	140000	0	0	0
2020	934	1	0	1	0	1	0	1	2	3	5	5	5	5	0.178467	0	35	0	6	5	4	26104	106000	1	0	1
2022	934	1	0	0	1	0	0	1	1	5	5	5	5	5	0.0469273	0	37	0	6	5	3	9396	73280	1	0	0
2020	935	1	0	0	1	1	0	1	4	3	5	5	5	5	0.0934979	0	32	0	9	3	4	26104	106000	1	0	0
2022	935	1	0	0	1	1	0	1	5	5	5	5	5	5	0.104846	0	34	0	6	3	1	31438	84000	0	0	0
2020	936	1	1	1	1	1	0	1	2	3	4	4	4	4	0.290714	0	24	1	15	3	4	26530	130000	1	0	1
2022	936	1	1	1	1	1	1	1	1	5	5	4	5	5	0.402574	1	26	1	15	3	4	10500	79734	1	0	1
2020	937	1	0	0	1	0	0	1	1	1	1	1	3	1	0.0118716	0	53	1	9	2	2	54594	76000	1	0	1
2022	937	1	0	0	1	0	0	1	2	1	1	5	1	1	0.0161806	1	55	1	9	1	2	45500	46080	1	0	1
2020	938	1	0	0	1	1	0	1	3	5	1	5	5	5	0.0849422	0	35	1	12	1	4	43080	75000	0	0	1
2022	938	1	0	0	1	1	0	1	2	4	3	5	3	4	0.0751307	1	37	1	12	1	4	77800	44000	0	0	0
2020	939	1	0	1	1	1	0	1	5	3	5	5	5	4	0.200985	0	23	0	12	2	3	7970	22600	1	0	1
2022	939	1	0	0	1	1	1	1	6	2	2	5	5	5	0.200378	1	25	1	9	3	3	43900	43000	1	0	1
2020	940	1	1	0	1	1	1	1	7	5	5	5	5	5	0.332297	0	42	0	9	2	1	26500	109600	0	0	1
2022	940	1	1	0	1	1	1	1	5	5	3	5	5	5	0.316825	0	44	0	9	1	1	43080	50000	1	0	1
2020	941	1	0	0	0	0	0	1	3	1	4	4	4	2	0.0273725	0	53	0	9	2	4	10000	81200	1	0	1
2022	941	1	0	0	1	0	0	1	2	2	2	4	3	3	0.0285518	0	55	1	9	2	5	166520	170000	1	0	1
2020	942	1	1	1	1	1	0	1	2	5	3	4	4	5	0.296391	0	27	1	16	3	4	10000	81200	1	0	1
2022	942	1	1	1	1	1	1	1	3	3	3	3	5	5	0.402723	1	29	1	16	2	5	166520	170000	1	0	1
2020	943	1	1	1	0	1	0	1	3	2	4	5	4	2	0.281798	0	37	1	9	3	5	39740	100000	1	0	1
2022	943	1	1	1	1	1	0	1	1	4	4	4	4	5	0.290173	0	39	1	9	3	3	37440	130000	1	0	1
2020	944	1	1	1	1	1	1	1	1	1	3	5	5	1	0.378857	0	26	0	15	3	1	188740	100000	0	0	0
2022	944	1	1	0	1	1	0	1	1	3	2	5	5	2	0.175101	1	28	0	15	1	1	67200	46000	0	0	1
2020	945	1	0	0	1	1	0	1	1	5	4	5	5	5	0.0805485	0	40	1	9	3	3	50800	80000	1	0	1
2022	945	1	0	0	1	1	0	1	3	4	4	5	5	5	0.0886756	1	42	1	9	3	3	83616	124800	1	0	1
2020	946	1	0	0	1	0	0	1	2	4	5	5	5	4	0.047468	0	54	1	12	3	3	53028	70000	1	0	1
2022	946	1	0	0	1	1	0	1	1	5	3	5	4	3	0.0723296	0	56	1	12	3	2	37320	80000	1	0	1
2020	947	1	1	0	1	0	1	1	4	5	3	4	4	4	0.270897	0	31	0	19	3	1	44850	85000	0	0	0
2022	947	1	1	0	1	1	1	1	7	5	5	5	4	5	0.330425	1	33	1	19	4	3	160000	160000	0	0	0
2020	948	1	0	0	1	0	0	1	1	1	1	1	1	1	0.0081289	0	44	1	9	5	4	74010	72150	1	0	1
2022	948	1	0	0	1	1	0	1	1	5	5	5	3	5	0.0790214	0	46	1	9	2	4	35506	73000	1	0	1
2020	949	1	0	0	1	0	1	1	3	3	3	3	3	3	0.143969	0	54	1	9	3	5	5000	139200	0	0	1
2022	949	1	0	0	1	0	1	1	3	2	3	3	3	3	0.141056	1	56	1	9	3	6	52500	126050	1	0	1
2020	950	1	0	1	1	0	1	1	3	3	5	3	5	3	0.256176	0	31	1	9	3	5	5000	139200	0	0	0
2022	950	1	0	0	1	0	0	1	1	3	4	3	3	4	0.0318097	1	33	1	9	3	6	52500	126050	1	0	1
2020	951	1	0	0	1	1	1	1	1	5	3	5	5	3	0.179601	0	31	1	9	3	5	5000	139200	0	0	1
2022	951	1	0	0	1	1	0	1	1	3	3	5	3	3	0.0646306	1	33	1	9	3	6	52500	126050	1	0	0
2020	952	1	0	0	1	1	0	1	2	1	3	3	4	3	0.0649292	0	32	1	12	3	5	107040	169700	1	0	1
2022	952	1	1	0	1	0	0	1	1	3	3	2	1	4	0.136228	0	34	1	12	3	6	90400	125800	1	0	1
2020	953	1	0	0	1	1	0	1	5	4	4	4	4	4	0.0951463	0	34	1	2	4	5	107040	169700	1	0	1
2022	953	1	0	0	1	1	0	1	7	4	4	4	4	4	0.106187	0	36	1	0	3	6	90400	125800	1	0	1
2020	954	1	1	0	1	1	0	1	3	4	4	3	3	5	0.194677	0	33	1	12	3	5	73970	253920	1	0	1
2022	954	1	1	0	1	1	1	1	1	4	3	4	4	5	0.289325	1	35	1	12	2	5	72004	143160	1	0	1
2020	955	1	0	0	1	0	0	1	1	5	5	5	5	5	0.0469273	0	49	1	9	3	2	117300	74500	1	0	1
2022	955	1	0	0	1	0	0	1	2	5	3	5	3	5	0.0442735	0	51	1	9	3	3	151760	133800	0	0	1
2020	956	1	0	0	1	0	0	1	4	3	3	5	4	4	0.0492923	0	51	1	9	3	4	39850	43420	1	0	1
2022	956	1	0	0	1	0	0	1	1	5	5	5	5	5	0.0469273	0	53	1	9	4	4	24800	58100	1	0	1
2020	957	1	0	0	1	1	0	1	2	3	4	3	4	5	0.0771043	0	44	1	12	3	6	194300	179300	1	0	1
2022	957	1	0	0	1	1	0	1	2	5	4	5	5	4	0.084003	0	46	1	12	3	8	199020	163600	0	0	1
2020	958	1	0	0	0	0	0	1	5	3	3	5	5	3	0.0465953	0	38	0	9	3	3	32200	60000	1	0	0
2022	958	1	0	0	0	0	0	1	2	1	1	5	1	1	0.0081577	0	40	0	9	3	3	11900	24500	1	0	0
2020	959	1	0	0	1	1	1	1	1	2	3	3	4	4	0.169789	0	16	0	9	4	6	194300	179300	1	0	0
2022	959	1	0	0	0	0	0	1	1	2	3	2	4	3	0.0178299	0	18	0	11	3	8	199020	163600	0	0	0
2020	960	1	0	0	1	1	0	1	5	5	2	5	3	3	0.0903242	0	43	1	9	2	6	194300	179300	1	0	1
2022	960	1	0	0	1	1	0	1	2	1	1	4	1	5	0.0596483	0	45	1	9	2	8	199020	163600	0	0	1
2020	961	1	1	0	1	0	0	1	1	3	5	5	5	5	0.152109	0	62	1	12	3	2	49260	51840	1	0	1
2022	961	1	1	1	1	0	0	1	1	3	5	5	5	3	0.25201	0	64	1	12	2	2	75270	30000	1	0	1
2020	962	1	0	0	1	0	0	1	2	4	3	3	4	3	0.0378337	0	54	1	9	4	6	71800	144050	1	0	1
2022	962	1	0	0	1	0	0	1	2	1	3	3	2	2	0.0232837	0	56	1	9	3	6	20000	152700	1	0	1
2020	963	1	0	0	1	0	0	1	3	3	3	4	3	3	0.0392018	0	29	1	15	4	6	71800	144050	1	0	1
2022	963	1	1	0	1	0	0	1	3	3	3	4	4	5	0.156215	0	31	1	15	4	6	20000	152700	1	0	0
2020	964	1	0	0	1	0	0	1	6	5	5	5	5	5	0.0745294	0	35	1	12	2	5	45610	60000	1	0	1
2022	964	1	0	0	1	0	0	1	5	3	1	5	5	3	0.0501868	0	37	1	12	3	5	39850	51500	1	0	1
2020	965	1	0	0	1	1	0	1	2	5	5	3	5	5	0.087019	0	47	1	9	2	3	130380	100000	1	0	1
2022	965	1	0	0	1	0	0	1	2	1	5	1	1	1	0.0225122	0	49	1	9	1	3	48600	50000	1	0	1
2020	966	1	0	1	1	1	1	1	5	5	5	5	5	5	0.314279	0	22	1	15	3	4	129420	25600	1	0	0
2022	966	1	0	1	1	1	0	1	5	5	5	5	5	5	0.208879	0	24	1	15	2	5	41780	35000	1	0	0
2020	967	1	1	0	1	0	1	1	1	5	4	4	5	4	0.258423	0	25	0	16	3	4	3000	90675	1	0	0
2022	967	1	1	0	1	0	1	1	1	5	3	4	5	3	0.254141	0	27	1	16	2	4	265920	131800	1	0	1
2020	968	1	0	0	1	0	0	1	1	5	5	5	1	1	0.0311781	0	54	1	0	1	5	94300	250000	1	0	1
2022	968	1	0	0	1	0	0	1	1	2	5	5	3	3	0.0303113	1	56	1	6	3	2	232036	134910	1	0	1
2020	969	1	0	0	0	0	0	1	1	1	5	5	5	1	0.0189856	0	56	1	9	3	5	94300	250000	1	0	1
2022	969	1	0	0	0	0	0	1	1	2	5	5	5	5	0.030163	1	58	1	9	2	2	232036	134910	1	0	1
2020	970	1	1	0	1	1	0	1	3	5	5	5	5	5	0.204815	1	33	1	19	4	5	94300	250000	1	0	0
2022	970	1	1	0	1	1	1	1	5	5	5	5	5	5	0.321256	0	35	1	19	3	3	322120	150000	0	1	0
2020	971	1	0	0	0	0	0	1	7	5	5	5	5	5	0.072027	0	48	1	6	2	3	29820	40000	1	0	1
2022	971	1	0	0	1	0	0	1	1	5	5	5	5	5	0.0469273	1	50	1	6	2	4	43178	68000	1	0	1
2020	972	1	0	0	1	0	0	1	4	1	3	5	4	5	0.0455306	0	46	1	9	3	3	60660	50000	0	0	0
2022	972	1	0	0	1	1	0	1	1	4	4	4	4	5	0.0751305	0	48	1	9	3	3	40000	60000	0	0	0
2020	973	1	0	0	1	0	0	1	1	3	4	5	4	3	0.0328808	0	56	1	9	3	2	8000	20000	0	0	1
2022	973	1	0	0	1	0	0	1	1	1	2	4	1	2	0.0143089	0	58	1	9	3	2	31320	30000	0	0	0
2020	974	1	0	0	1	1	1	1	2	4	4	4	4	5	0.186051	0	33	1	12	3	3	100000	100000	0	0	0
2022	974	1	0	0	1	1	1	1	3	5	5	5	5	5	0.199205	0	35	1	12	3	4	107920	60000	0	0	1
2020	975	1	0	0	1	0	0	1	1	5	2	5	3	4	0.0344715	0	32	1	10	3	6	25940	10000	1	0	1
2022	975	1	0	0	1	1	1	1	7	5	5	5	5	5	0.221287	0	34	0	10	3	6	50880	75960	1	0	1
2020	976	1	0	0	1	0	0	1	1	4	4	5	5	5	0.0417978	0	39	1	6	4	5	42296	60000	1	0	1
2022	976	1	0	0	1	0	0	1	1	3	4	3	3	3	0.0297438	1	41	1	6	3	5	30000	45595	1	0	1
2020	977	1	0	0	1	0	0	1	1	3	4	5	2	1	0.0250062	0	38	1	8	3	5	42296	60000	1	0	0
2022	977	1	0	0	1	0	0	1	1	3	3	5	2	3	0.0269223	1	40	1	8	3	5	30000	45595	1	0	1
2020	978	1	0	0	1	0	0	1	5	5	5	5	5	5	0.069009	0	47	1	9	5	5	18520	62000	1	0	1
2022	978	1	0	0	1	1	0	1	5	4	5	5	5	5	0.101932	1	49	1	9	4	5	60660	101000	1	0	1
2020	979	1	0	0	1	0	0	1	2	3	3	4	4	4	0.0376186	0	22	1	12	4	4	79540	90000	1	1	0
2022	979	1	0	1	1	1	1	1	3	3	3	4	4	3	0.286343	1	24	1	12	3	4	145977	116000	0	0	1
2020	980	1	0	0	1	0	0	1	6	1	4	5	5	2	0.0544609	0	45	1	7	2	4	235976	120000	1	0	1
2022	980	1	0	0	1	1	0	1	7	5	5	5	5	5	0.115887	1	47	1	7	3	3	85556	71125	1	0	1
2020	981	1	0	1	1	0	0	1	4	4	5	5	4	5	0.162736	0	48	1	0	4	4	235976	120000	1	0	1
2022	981	1	0	0	1	0	0	1	3	3	3	1	4	5	0.0433065	0	50	1	0	5	3	85556	71125	1	0	1
2020	982	1	0	0	1	0	0	1	1	1	1	5	1	5	0.0189238	0	50	1	3	2	2	121316	40000	1	0	1
2022	982	1	0	0	1	1	0	1	1	1	1	5	5	5	0.0622462	0	52	1	6	3	2	32816	37200	1	0	1
2020	983	1	0	0	1	1	0	1	1	3	3	5	3	3	0.0646306	1	38	1	6	4	6	40000	115000	1	0	1
2022	983	1	0	0	1	0	0	1	1	1	1	1	1	4	0.0143266	0	40	1	9	4	6	58460	107100	1	0	0
2020	984	1	1	0	1	0	0	1	2	1	3	4	5	5	0.146738	0	38	1	12	3	4	95520	40000	1	0	1
2022	984	1	0	0	1	0	0	1	1	3	5	2	5	5	0.0392013	0	40	1	12	3	5	99980	109000	1	0	1
2020	985	1	1	0	1	1	0	1	5	5	5	5	5	5	0.215856	0	34	1	12	4	6	252400	240000	0	0	0
2022	985	1	1	0	1	0	0	1	5	4	4	4	4	3	0.168253	0	36	1	12	3	6	72200	151000	0	0	0
2020	986	1	1	0	1	1	1	1	5	4	3	3	4	4	0.308708	0	25	0	16	3	4	66500	115000	1	0	1
2022	986	1	1	0	1	1	1	1	4	5	4	4	4	5	0.311016	0	27	1	16	3	2	71700	120000	0	0	1
2020	987	1	0	0	1	0	0	1	1	4	2	5	5	5	0.0373663	0	52	1	6	3	5	30550	32400	0	0	1
2022	987	1	0	0	1	1	0	1	1	3	3	5	4	3	0.066502	1	54	1	6	3	5	5629	45410	1	0	1
2020	988	1	0	0	1	1	0	1	1	3	3	4	3	5	0.0681296	0	45	1	9	3	4	45286	170750	1	0	1
2022	988	1	0	0	1	1	0	1	2	1	3	5	5	4	0.0701321	1	47	1	9	3	4	34461	75000	1	0	1
2020	989	1	0	0	1	0	0	1	1	1	1	5	5	1	0.0181457	0	51	1	9	3	3	40036	57200	1	0	1
2022	989	1	0	0	1	0	0	1	2	5	5	5	5	5	0.0524477	0	53	1	9	4	3	53784	72000	0	0	1
2020	990	1	0	0	1	0	0	1	1	1	2	3	2	3	0.0176134	0	51	1	8	1	1	27200	23000	0	0	1
2022	990	1	0	0	1	0	0	1	1	5	3	5	5	5	0.0424958	0	53	1	8	2	2	31550	41200	1	0	1
2020	991	1	1	1	1	1	0	1	3	3	3	5	5	4	0.296523	1	31	1	15	3	5	130360	150000	1	1	0
2022	991	1	1	1	0	0	1	1	5	4	3	5	5	5	0.374084	1	33	1	15	2	5	128290	110200	0	1	0
2020	992	1	0	1	1	0	0	1	3	4	4	5	5	5	0.156871	0	29	1	9	1	6	33146	175000	0	0	0
2022	992	1	0	1	1	0	0	1	4	2	3	5	4	5	0.152477	0	31	1	9	4	5	103940	150000	1	0	1
2020	993	1	1	0	1	1	0	1	6	5	4	5	4	4	0.215223	1	27	0	16	3	6	33146	175000	0	0	0
2022	993	1	1	0	1	1	1	1	6	4	3	4	3	4	0.31299	0	29	0	16	3	1	51640	100000	0	0	0
2020	994	1	0	0	1	1	0	1	5	5	5	5	5	5	0.104846	0	26	1	9	3	6	33146	175000	0	0	0
2022	994	1	0	0	1	1	0	1	2	4	5	5	5	5	0.0853708	0	28	1	9	3	5	103940	150000	1	0	0
2020	995	1	1	1	1	1	0	1	2	5	3	5	4	4	0.294958	1	27	1	16	3	4	28131	182000	1	1	0
2022	995	1	1	1	1	0	1	1	2	4	3	3	4	4	0.360342	1	29	1	16	2	2	82619	210000	0	1	0
2020	996	1	0	1	1	1	0	1	6	3	4	5	4	5	0.204484	0	33	1	6	1	3	35420	3715	1	0	1
2022	996	1	0	0	1	1	0	1	4	2	3	5	4	4	0.0822154	0	35	1	6	3	3	50500	30000	0	1	0
2020	997	1	0	0	1	0	1	1	2	5	4	5	5	5	0.155632	1	31	1	9	3	6	38272	134090	1	0	1
2022	997	1	0	0	1	1	0	1	2	5	2	5	1	4	0.072086	0	33	1	9	2	6	99290	150000	0	0	1
2020	998	1	0	0	1	0	0	1	3	5	5	5	5	5	0.0579681	0	30	1	15	3	6	38272	134090	1	0	0
2022	998	1	1	0	1	1	1	1	1	5	5	5	5	5	0.299174	0	32	1	9	4	6	99290	150000	0	0	0
2020	999	1	0	0	1	0	0	1	1	3	2	3	2	1	0.0193092	0	50	1	6	3	3	21284	21600	1	0	1
2022	999	1	0	0	1	0	0	1	1	3	1	5	1	5	0.0247513	0	52	1	6	3	3	23100	40000	1	0	1
2020	1000	1	0	1	1	0	0	1	2	3	4	5	4	3	0.142434	0	28	1	9	2	7	67280	81450	1	0	0
[truncated: 2,439 more rows]
