# Supplementary material
Source: Research Square preprint supplement (doi:10.21203/rs.3.rs-9391948/v1)
Supplement: Supplementary file 1 [file eb9d54c1cbb85e6f5134e92a.docx]

Table 1: Digital Literacy Indicator Framework

| Dimension | Digital Literacy Content | Evaluate the options | Assignment | Properties |
| --- | --- | --- | --- | --- |
| Digital Skills | Digital Operational Literacy | Do you use mobile data? | 0~1 | + |
| Do you access the internet using a computer? | 0~1 | + |
| Digital  Literacy | Digital Media Literacy | Do you play online games? | 0~1 | + |
| Do you watch short videos? | 0~1 | + |
| Digital Business Literacy | Do you shop online? | 0~1 | + |
| Digital Learning Literacy | Do you engage in online learning? | 0~1 | + |
| Digital Social Literacy | Do you use WeChat? | 0~1 | + |
| Frequency of posts on Moments | 1~7 | + |
| Digital Attitudes | Digital Operational Literacy | The Importance of the Internet for Work | 1~5 | + |
| The Importance of the Internet for Leisure and Entertainment | 1~5 | + |
| The Importance of the Internet for Staying in Touch with Family and Friends | 1~5 | + |
| The Importance of the Internet for Learning | 1~5 | + |
| The Importance of the Internet in Daily Life | 1~5 | + |

Table 2: Definitions of Key Variables and Descriptive Statistics

| Variable types | Variable names | Symbols | Variable Definitions | mean | sd | min | max |
| --- | --- | --- | --- | --- | --- | --- | --- |
| Dependent Variable | Rural Residents' Willingness to Participate in Old-age Insurance | insurance | Whether enrolled in basic old-age insurance: Yes = 1; No = 0 | 0.118 | 0.322 | 0 | 1 |
| Explanatory Variable | Digital Literacy | sz | Calculated using the entropy method. | 0.131 | 0.097 | 0.0001 | 0.436 |
| Mediating Variables | Social Participation | tpp | Did you vote in the village committee election? Yes = 1; No = 0 | 0.429 | 0.495 | 0 | 1 |
| Financial Participation | jr | Whether the household has purchased financial products: Yes = 1, No = 0 | 0.039 | 0.194 | 0 | 1 |
| Control variables at the individual level | Age | age | / | 37.975 | 10.312 | 16 | 70 |
| Marital Status | marry | Married = 1; Unmarried, divorced, or widowed = 0 | 0.821 | 0.383 | 0 | 1 |
| Level of Education | edu | Years of education | 9.580 | 3.521 | 0 | 19 |
| Economic Status | economic | Your income in this area: very low = 1; low = 2; high = 3; relatively high = 4; very high = 5 | 2.852 | 0.931 | 1 | 5 |
| Control variables at the household level | Household Size | family | Number of family members | 4.652 | 1.966 | 1 | 13 |
| Total household Expenses | lnzc | The logarithm of total household expenditure | 10.980 | 0.828 | 6.685 | 13.964 |
| Total household Income | lnsr | The logarithm of household net income | 11.232 | 0.751 | 6.551 | 13.964 |
| Agricultural Production | agriculture | If the household is engaged in agricultural work, set to 1; otherwise, set to 0 | 0.685 | 0.465 | 0 | 1 |
